# Supplementary material
Source: Research Square preprint supplement (doi:10.21203/rs.3.rs-9540103/v1)
Supplement: Supplementary file 1 [file 0117efeb6bc83152a4962b7a.xlsx]

## Sheet: PFT_counts
Age, yr BP	wt.e.mb.lhs	ft.ml.lhs	wt.cd.mb.lhs	lsuc	te.cd.mb.lhs	ha	dt.sl.lhs	ar.fb	ar.cd.mb.eds	ar.cd.mb.pds	s	g	eu-dt.fb	rc.fb	te-dt.fb	te-fa.cd.mb.t	te-fi.cd.mb.t	bo.cd.mb.t	te-ft.cd.mb.t	bo.cd.mb.lhs	bo.e.n.lhs	eu.e.n.t	bo.e.n.t	c-te.e.n.t
0	0.632456	0.316228	1.9741	2.42899	6.1723	3.26565	7.84684	3.82947	4.70319	5.53985	1.09545	3.04959	8.05105	8.6835	11.6063	0.83666	0.83666	4.19821	4.19821	4.19821	4.09878	4.20714	4.41501	4.52336
7.9	0	0	0.632456	2.93258	5.15582	2.93258	7.80084	1.09082	4.83959	5.15582	0.316228	2.79285	7.80084	7.80084	9.20789	0.316228	0.316228	4.52336	4.52336	4.52336	3.34664	4.03733	5.63781	6.3285
65.4	0	0	0	2.73861	2.82807	2.73861	8.36	2.31956	2.28035	2.82807	1.61245	1.89737	8.36	8.36	9.06711	0.547723	0.547723	2.82807	2.82807	2.82807	2.82843	5.01986	5.39381	7.03752
138	0	0	0	3.17805	2.58844	3.17805	9.62786	2.34458	2.58844	2.58844	1.89737	2.23607	9.62786	9.62786	10.0751	0	0	2.58844	2.58844	2.58844	1.48324	5.68892	2.19035	5.30058
209.4	0	0	0	3.60555	2.44949	3.60555	9.60555	1.09082	2.76572	2.76572	0.774597	1.30384	9.60555	9.60555	9.92178	0	0	2.44949	2.44949	2.44949	2.75681	5.31332	4.9477	6.72961
271.7	0	0	0	3.39116	2.77489	3.39116	9.05685	2.13282	2.77489	2.77489	1.81659	1.51658	9.05685	9.05685	9.37308	0	0	2.77489	2.77489	2.77489	2.94958	4.97455	4.13279	5.84154
344.4	0	0	0	3.31662	3.03315	3.31662	9.8588	2.10157	3.03315	3.03315	1.26491	1.84391	9.8588	9.8588	13.245	0	0	3.03315	3.03315	3.03315	1.48324	4.15328	3.6983	5.53169
420.3	0	0.774597	0	3.72827	2.84605	3.72827	9.96526	1.87004	2.84605	2.84605	1.09545	1.44914	9.96526	9.96526	10.7399	0	0	2.84605	2.84605	2.84605	1.78885	4.40279	4.38071	6.67841
497.1	0	0	0	3.91152	2.68328	3.91152	9.5418	0.632456	2.68328	2.68328	0.632456	2.73861	9.5418	9.5418	11.6631	0	0	2.68328	2.68328	2.68328	3.20936	4.09242	4.67848	4.72488
565.8	0	0.316228	0.316228	3.47851	2.84605	4.11096	9.6672	1.99749	2.84605	2.84605	1.04881	2.60768	10.2997	10.2997	12.3463	0	0	2.52982	2.52982	2.52982	2.66458	3.14643	5.49097	5.97281
634.5	0	0	0	3.82099	3.81995	3.82099	9.8043	1.89737	2.98329	3.81995	1.58114	2.21359	9.8043	9.8043	10.1205	0.83666	0.83666	3.81995	3.81995	3.81995	2.60768	4.41437	3.76057	4.7306
706.9	0	0	0	2.98329	3.4641	3.29951	8.86546	0.547723	3.4641	3.4641	0.547723	1.67332	9.18169	9.18169	9.18169	0	0	3.4641	3.4641	3.4641	2.62679	4.4833	5.58355	7.44007
780.3	0	0	0	3.20936	2.68328	3.20936	8.86622	2.87968	2.68328	2.68328	1.78885	2.02485	8.86622	8.86622	9.95704	0	0	2.68328	2.68328	2.68328	3.03315	5.60701	4.37479	5.99997
847.7	0	0	0.83666	3.06594	4.13817	3.6984	9.01573	2.58114	4.13817	4.13817	1	2.36643	9.64819	9.64819	11.4335	0	0	3.30151	3.30151	3.30151	3.01662	5.26403	3.01662	3.71484
934.3	0	0.83666	0	3	2.64575	3.63246	8.5857	1.7279	2.64575	2.64575	1.09545	1.22474	9.21815	9.21815	9.21815	0	0	2.64575	2.64575	2.64575	1.94936	5.31977	5.96837	9.33879
1012	0	0	0	3.28634	3.06594	3.28634	9.26965	1.40705	3.06594	3.06594	0.316228	2.32379	9.26965	9.26965	10.3605	0	0	3.06594	3.06594	3.06594	1.84391	4.92057	3.84325	6.60369
1089.7	0	0	0.316228	3.44964	4.32027	3.76587	9.29771	3.72131	4.00405	4.32027	1.26491	2.50998	9.61394	9.61394	12.0703	0.316228	0.316228	4.00405	4.00405	4.00405	2.44949	3.66509	4.96807	5.34701
1159.6	0	0	0	3.97492	2.82843	3.97492	9.86559	2.0346	2.82843	2.82843	1.14018	2.23607	9.86559	9.86559	10.76	0	0	2.82843	2.82843	2.82843	3.25576	3.28634	6.44566	6.47623
1229.4	0	0.316228	0	2.54951	3.7927	2.54951	8.1709	1.36504	2.89828	3.7927	0.316228	1.81659	8.1709	8.1709	9.92681	0.894427	0.894427	3.7927	3.7927	3.7927	4.03733	4.03106	7.82822	7.50573
1289.4	0	0	0.316228	3.03315	4.12411	3.34938	8.63672	3.16773	4.12411	4.12411	1.76068	2.94958	8.95295	8.95295	10.36	0	0	3.80789	3.80789	3.80789	2.19089	4.4352	4.65615	6.12586
1336.9	0	0.316228	0	3.68782	3.43071	3.68782	9.76235	2.64464	3.11448	3.43071	1.09545	2.89828	9.76235	9.76235	11.3115	0.316228	0.316228	3.43071	3.43071	3.43071	2.58844	2.93258	4.13763	4.48177
1388.6	0	0.316228	0.316228	2.28035	3.70739	2.59658	7.93721	4.08309	4.7562	4.7562	1.30384	2.46982	8.25343	8.25343	12.6759	0	0	3.39116	3.39116	3.39116	2.82843	4.14729	4.64502	5.96388
1444.8	0	0	0	3.40588	3.64908	3.72211	9.28805	2.56113	3.01662	3.64908	1.61245	2.50998	9.60428	9.60428	10.553	0.632456	0.632456	3.64908	3.64908	3.64908	2.56905	4.92179	4.66666	5.9706
1501.1	0	0.547723	0	2.75681	2.44949	2.75681	8.34251	1.54772	2.44949	2.44949	0.547723	2.34521	8.34251	8.34251	9.34251	0	0	2.44949	2.44949	2.44949	3.36155	4.81664	6.23377	7.68886
1562.6	0	0	0.547723	3.14643	3.11677	3.14643	8.7767	2.54521	3.11677	3.11677	1.04881	2.72029	8.7767	8.7767	10.8208	0	0	2.56905	2.56905	2.56905	2.09762	4.76445	4.86197	7.52881
1616.3	0	0	0	3.39116	2.58844	3.39116	9.22212	2.60929	2.58844	2.58844	1.14018	1.48324	9.22212	9.22212	10.6912	0	0	2.58844	2.58844	2.58844	2.70185	4.75395	5.42317	7.47526
1671.6	0	0	0	3.24037	3.2145	3.24037	8.87952	3.06954	2.89828	3.2145	1.34164	2.09762	8.87952	8.87952	10.6074	0.316228	0.316228	3.2145	3.2145	3.2145	1.94936	4.97455	5.19895	7.90792
1725.7	0	0	0.83666	3.20936	3.95114	3.84182	8.88387	3.47851	3.95114	3.95114	1.26491	2.64575	9.51632	9.51632	11.9341	0	0	3.11448	3.11448	3.11448	2.07364	4.92198	3.45205	5.66793
1775.5	0	0	0.632456	3.64692	3.88822	3.64692	9.52909	2.86164	3.88822	3.88822	1.48324	2.40832	9.52909	9.52909	11.54	0	0	3.25576	3.25576	3.25576	2.58844	3.83759	4.05755	4.99048
1830	0	0	0	3.6606	2.91548	3.97683	9.75978	1.26491	2.91548	2.91548	0.632456	1.89737	10.076	10.076	10.7085	0	0	2.91548	2.91548	2.91548	2.91548	4.05789	5.23567	6.06185
1884.6	0	0	0	3.6606	2.60768	3.97683	10.5017	1.99749	2.60768	2.60768	0	2.40832	10.8179	10.8179	12.4991	0	0	2.60768	2.60768	2.60768	1.97484	3.75134	3.65611	5.11638
1938.1	0	0	0.316228	2.96648	3.69262	2.96648	9.03278	3.73403	3.69262	3.69262	1.58114	3.19374	9.03278	9.34901	11.5019	0	0	3.37639	3.37639	3.37639	2.70185	4.00884	3.84203	4.51656
1994.1	0	0.316228	0	3.28634	3.73675	3.91879	9.37731	2.1319	3.42053	3.73675	1.18322	2.58844	10.0098	10.0098	10.9585	0.316228	0.316228	3.73675	3.73675	3.73675	2.30217	3.89872	4.02545	5.622
2054.8	0	0	0	2.93258	4.15382	2.93258	8.1191	1.04881	3.52136	4.15382	1.04881	2.04939	8.1191	8.1191	8.1191	0.632456	0.632456	4.15382	4.15382	4.15382	2.34521	4.90918	5.72043	8.28439
2112.3	0	0	0.316228	2.70185	3.76587	2.70185	8.37636	2.73403	3.76587	3.76587	0.83666	2.16795	8.37636	8.37636	10.5899	0	0	3.44964	3.44964	3.44964	1.54919	5.35474	3.40639	6.57949
2173.7	0	0	0.547723	2.91548	4.12543	3.4632	8.55462	2.78885	5.01986	5.01986	1	2.23607	9.10235	9.10235	11.4389	0	0	3.57771	3.57771	3.57771	3.1305	4.12543	5.78725	6.23446
2230.6	0	0	0	3.34664	2.89828	3.34664	9.01233	2.88333	3.53073	3.53073	0.83666	2.50998	9.01233	9.01233	11.059	0	0	2.89828	2.89828	2.89828	2.44949	4.52336	5.00388	6.76153
2285.2	0	0	0	3.19374	4.36592	3.19374	8.81513	2.04413	4.59741	4.91364	0.948683	2.07364	8.81513	8.81513	9.91058	0.316228	0.316228	4.36592	4.36592	4.36592	2.21359	4.32435	4.67885	6.78961
2340.4	0	0	0	3.86005	3.25576	3.86005	9.52574	2.97298	3.25576	3.25576	1.51658	1.70294	9.52574	9.52574	10.9821	0	0	3.25576	3.25576	3.25576	2.02485	4.43933	5.04969	7.14795
2394.2	0	0.316228	0	3.28634	3.03315	3.28634	8.92548	2.63235	3.03315	3.03315	1.44914	2.30217	8.92548	8.92548	10.1087	0	0	3.03315	3.03315	3.03315	2.16795	3.28634	5.54062	6.65901
2451.9	0	0	0.774597	3.50714	4.39399	4.28173	9.56519	2.35574	4.39399	4.39399	0.948683	1.92354	10.3398	10.3398	11.7468	0	0	3.61939	3.61939	3.61939	2.75681	3.25576	5.00933	5.50829
2514	0	0	0	3.4641	2.68328	3.4641	8.98678	2.25946	2.68328	2.68328	0.316228	2.21359	8.98678	8.98678	11.2462	0	0	2.99951	2.99951	2.99951	1.73205	4.13521	6.26327	8.66643
2575.4	0	0	0	3.1305	2.94301	3.1305	8.805	1.87004	2.62679	2.94301	1.09545	1.78885	8.805	8.805	9.5796	0.316228	0.316228	2.94301	2.94301	2.94301	3.08221	4.60575	6.95309	8.16041
2633.7	0	0.83666	0.316228	3.74166	3.63246	3.74166	9.68304	3.22251	3.31623	3.63246	1.54919	2.42899	9.68304	9.68304	11.6726	0.316228	0.316228	3.31623	3.31623	3.31623	2.81069	3.75214	4.39183	4.49661
2695.7	0	0	0	3.34664	3.20936	3.34664	8.70388	1.63246	3.20936	3.20936	0.632456	1	8.70388	8.70388	9.70388	0	0	3.20936	3.20936	3.20936	2.91548	5.25847	6.66679	8.37732
2757.3	0	0	0	3.33167	2.84605	3.33167	9.11094	2.69463	2.84605	2.84605	1.3784	2.30217	9.11094	9.11094	10.4272	0	0	2.84605	2.84605	2.84605	3.28634	3.31623	7.18201	6.89567
2820.9	0	0.316228	0	2.88097	3.14465	2.88097	8.3582	2.31557	3.14465	3.46088	0.774597	2.28035	8.3582	8.3582	9.89917	0.316228	0.316228	3.14465	3.14465	3.14465	2.56905	4.48756	6.78745	8.38974
2882	0	0	0.316228	4.13521	4.28448	4.13521	9.89716	3.28904	3.73675	4.28448	1.51658	2	9.89716	9.89716	11.9859	0.547723	0.547723	3.96825	3.96825	3.96825	1.78885	3.53553	3.90509	5.65177
2945.1	0	0	0	2.94958	3.16228	2.94958	9.05695	2.38043	3.16228	3.16228	1.67332	2.40832	9.05695	9.05695	9.76406	0	0	3.16228	3.16228	3.16228	2.46982	3.78153	5.1531	6.46482
3006.4	0	0	0.632456	3.70135	3.84182	3.70135	9.04925	2.26491	3.84182	3.84182	1	2.23607	9.04925	9.04925	10.9466	0	0	3.20936	3.20936	3.20936	3.11448	4.01248	6.39573	7.29372
3068.3	0	0	0	3.28634	3.34664	3.28634	9.56328	2.59658	3.66287	3.66287	1.14018	2.09762	9.56328	9.56328	12.0197	0	0	3.34664	3.34664	3.34664	1.14018	4.01248	3.98329	6.85559
3127.9	0	0	0	3.36155	3.14643	3.67778	9.50972	1.46912	3.14643	3.14643	0	1.44914	9.82595	9.82595	10.9788	0	0	3.14643	3.14643	3.14643	1.78885	3.92428	5.66809	7.80352
3189.5	0	0.632456	0.632456	3.47851	4.07918	3.47851	9.53656	2.89737	3.76295	4.07918	1.26491	1.97484	9.53656	9.53656	12.4339	0.316228	0.316228	3.44672	3.44672	3.44672	2.93258	2.95625	5.19749	4.5887
3259	0	0	0	3.20936	3.16228	3.52559	9.79723	2.36643	2.84605	3.16228	1.18322	1.73205	10.1135	10.1135	11.2967	0.316228	0.316228	3.16228	3.16228	3.16228	1.18322	3.88587	3.78122	6.48387
3334.6	0	0	0	3.16228	3.9791	3.16228	8.58445	3.26887	3.34664	3.9791	0.948683	2.14476	8.58445	8.58445	11.5371	0.632456	0.632456	3.9791	3.9791	3.9791	2.79285	4.20714	4.90909	6.32337
3411.9	0	0	0.316228	3.57771	3.17979	4.21016	9.37426	1.26491	3.17979	3.17979	0	0.948683	10.0067	10.0067	10.9554	0	0	2.86356	2.86356	2.86356	2.91548	5.54792	7.01396	8.19726
3486.1	0	0.774597	0	3.4641	4.24907	3.4641	9.37172	3.34797	3.70135	4.24907	1.30384	2.19089	9.37172	9.37172	13.0892	0.547723	0.547723	4.7968	4.7968	4.7968	1.67332	2.97671	5.34664	6.10231
3571.2	0	0	0	3.755	2.98329	3.755	9.31377	4.01851	3.29951	3.29951	1.22474	1.94936	9.31377	9.31377	12.1075	0	0	2.98329	2.98329	2.98329	2.28035	3.61774	6.29594	7.3171
3646.1	0	0.316228	0	2.89828	2.79285	2.89828	8.38462	3.28408	3.10908	3.10908	1.70294	2.66458	8.38462	8.38462	10.282	0	0	2.79285	2.79285	2.79285	1.78885	4.66905	5.44115	8.32134
3713.7	0	0.707107	0	3.6606	2.68328	3.6606	9.55127	2.39045	2.68328	2.68328	1.34164	2.36643	9.55127	9.55127	10.6001	0	0	2.68328	2.68328	2.68328	1.44914	5.31031	4.6415	7.60824
3789.4	0	0.316228	0	3.2249	3.42053	3.54113	9.14943	2.26491	3.42053	3.42053	0.632456	2.09762	9.46566	9.46566	10.7819	0	0	3.42053	3.42053	3.42053	2.48998	3.50714	5.84405	6.8612
3874.7	0	0.774597	0	2.93258	3.28271	3.2488	8.81475	3.44525	2.96648	3.28271	1.61245	1.92354	9.13098	9.13098	10.6476	0.316228	0.316228	3.28271	3.28271	3.28271	2.21359	4.06202	5.33075	7.17917
3955	0	0.547723	0	3.40588	2.73861	3.40588	9.18515	3.28013	3.92183	3.92183	0.774597	2.40832	9.18515	9.18515	12.9945	0	0	2.73861	2.73861	2.73861	2.46982	3.79473	5.65971	6.98463
4046.3	0	0	0	3	3	3	8.2345	2.27866	3	3	1.09545	2.19089	8.2345	8.2345	9.41772	0	0	3	3	3	2.89828	4.42719	7.21258	8.74149
4128.9	0	0	0	2.96648	2.32379	2.96648	7.95647	1.31623	2.32379	2.32379	0.316228	2.12132	7.95647	7.95647	9.79313	0	0	2.32379	2.32379	2.32379	1.51658	5.54977	6.53511	10.5683
4221.4	0	0	0.547723	3.2249	4.01182	3.2249	8.29442	3.14509	4.55955	4.55955	0.894427	2.09762	8.29442	8.29442	11.0928	0	0	3.4641	3.4641	3.4641	2.98329	4.15327	6.58788	7.21014
4293.1	0	0.632456	0	3.08221	2.56905	3.08221	8.31671	2.26491	2.56905	2.56905	1.26491	1.54919	8.31671	8.31671	10.1534	0	0	2.56905	2.56905	2.56905	2.77489	4.73286	6.7128	8.67077
4372	0	0	0	3.37639	4.40037	3.37639	8.76155	3.09545	3.56371	4.40037	1	1.87083	8.76155	8.76155	10.857	0.83666	0.83666	4.40037	4.40037	4.40037	2.81069	4.01248	4.81069	6.01248
4454.7	0	0	0	3.28634	2.98329	3.28634	8.0192	2.39387	2.98329	2.98329	0.894427	2.34521	8.0192	8.0192	9.83487	0	0	2.98329	2.98329	2.98329	3.52136	4.08656	7.96602	8.53122
4526.4	0	0	0	3.54965	3.50714	4.09737	9.12639	0.547723	3.50714	3.50714	0	2	9.67411	9.67411	9.67411	0	0	3.50714	3.50714	3.50714	2.58844	3.70135	6.66208	7.775
4591	0	0.316228	0.316228	3.33167	4.41278	3.33167	8.77225	2.60929	3.78033	4.41278	0.632456	2.07364	8.77225	8.77225	11.0653	0.632456	0.632456	4.09656	4.09656	4.09656	2.40832	3.71484	6.9183	8.22482
4670.7	0	0.316228	0	3.43511	3.47851	3.43511	8.8665	3.2594	3.79473	3.79473	1.34164	2.36643	8.8665	8.8665	10.7843	0	0	3.47851	3.47851	3.47851	2.07364	3.94968	6.31524	8.19128
4747.5	0	0.632456	0.316228	3.74166	4.66978	3.74166	9.56403	2.85619	4.35355	4.66978	0.774597	1.44914	9.56403	9.56403	11.9618	0.316228	0.316228	4.35355	4.35355	4.35355	2.21359	3.03315	5.27518	6.09474
4825.7	0	0.316228	0	3.25576	0.707107	3.25576	8.65021	2.598	0.707107	0.707107	1.54919	2.89828	8.65021	8.65021	11.4311	0	0	0.707107	0.707107	0.707107	1.73205	4.89898	6.1194	9.28633
4906.5	0.707107	0	0.707107	3.755	4.70711	4.4621	10.1101	3.07208	4	4	1.34164	2.23607	10.1101	10.8172	13.1334	0	0	4	4	4	0.894427	5.15049	1.78885	4.59578
4983.8	0	0	1.26491	3.03315	4.82862	3.03315	8.65454	3.97641	4.82862	4.82862	1.54919	1.64317	8.65454	8.65454	12.8944	0	0	3.56371	3.56371	3.56371	1.92354	3.59166	5.90874	7.57686
5059	0	0.316228	1.26491	3.49285	5.58114	3.49285	9.14086	1.15289	5.26491	5.58114	0	2.04939	9.14086	9.14086	11.8749	0.316228	0.316228	4.31623	4.31623	4.31623	2.19089	3.92428	4.16573	5.89913
5141.7	0	0.316228	0.774597	3.2249	4.2531	3.2249	7.96832	2.19089	4.2531	4.2531	1.09545	2.19089	7.96832	7.96832	10.9338	0	0	3.47851	3.47851	3.47851	2.07364	4.82701	6.10037	8.85374
5215.4	0	0.316228	0.632456	3.59166	4.00884	3.90788	8.92082	2.39314	4.6413	4.6413	1.76068	1.48324	9.23705	9.23705	10.502	0	0	3.37639	3.37639	3.37639	2.89828	3.28634	7.78165	8.16971
5297.9	0	0	1	3.34664	4.86005	3.79385	8.68518	3.55361	5.30727	5.30727	1.30384	2.16795	9.13239	9.13239	12.3822	0	0	3.86005	3.86005	3.86005	1.22474	4.23084	4.82762	7.83372
5380.4	0	0	1	3.40588	5.11096	3.40588	9.51325	2.55439	5.11096	5.11096	1.41421	1.94936	9.51325	9.51325	11.6534	0	0	4.11096	4.11096	4.11096	1.14018	3.09839	4.47334	6.43155
5458.7	0	0	1.14018	3.83406	5.17124	3.83406	9.21922	2.08886	4.85501	5.17124	0.632456	2.36643	9.21922	9.21922	12.6525	0.316228	0.316228	4.03106	4.03106	4.03106	1.34164	3.43511	5.44042	7.53389
5537	2.38747	0	2.38747	3.25576	6.04807	3.57199	10.8777	5.20314	4.29306	4.29306	1	1.78885	8.80649	11.194	13.0096	0	0	3.6606	3.6606	3.6606	1.61245	4.79473	5.18313	7.36542
5614.2	0	0	0.316228	3.31662	3.85176	3.31662	8.71107	4.28271	4.16799	4.16799	1.48324	2.25832	8.71107	8.71107	11.8268	0	0	3.53553	3.53553	3.53553	1.67332	4.15328	5.76158	7.40488
5690.3	0	0.316228	1.34164	2.89828	6.40129	3.2145	8.19922	3.93879	5.4526	6.40129	0.948683	2.46982	8.51545	8.51545	13.7557	0.948683	0.948683	5.05964	5.05964	5.05964	2.09762	3.2249	4.98845	6.11574
5769.5	0	0	0.316228	3.91152	4.51146	4.22775	9.08839	1.58114	4.51146	4.51146	0.948683	1.34164	9.40462	9.40462	10.6695	0	0	4.19524	4.19524	4.19524	1.22474	3.79473	5.71396	8.28395
5846.8	0	0.632456	1.44914	2.94958	5.37342	2.94958	8.54422	3.95912	6.21008	6.21008	0.83666	2.46982	8.54422	8.54422	14.0645	0	0	3.92428	3.92428	3.92428	0.948683	2.86356	4.82792	6.7428
5927.8	0	0	1.30384	3.27109	6.22582	3.27109	8.98948	2.80328	5.59336	6.22582	1.18322	1.70294	8.98948	8.98948	11.9134	0.632456	0.632456	4.92198	4.92198	4.92198	0.83666	2.96648	4.58899	6.71881
6007.2	0	0.707107	0	2.94958	3.94941	2.94958	7.93957	3.49186	3.63318	3.94941	1.41421	2.40832	7.93957	7.93957	10.0172	0.316228	0.316228	3.94941	3.94941	3.94941	1.81659	4	6.52806	8.71147
6082.2	0	0	0.83666	2.70185	4.85424	2.70185	7.48725	3.94701	5.17047	5.48669	1.54919	2.30217	7.48725	7.48725	11.5584	0.316228	0.316228	4.01758	4.01758	4.01758	1.87083	3.49285	7.57431	9.19633
6159.7	0	0.316228	0	3.24037	3.82099	3.24037	7.99432	3.30578	3.82099	3.82099	1	2.44949	7.99432	7.99432	10.6163	0	0	3.82099	3.82099	3.82099	2.04939	4.29115	6.49888	8.42441
6223.4	0	0.632456	0.632456	3.64692	4.46651	3.64692	8.47392	3.73186	4.46651	4.46651	1.09545	2.21359	8.47392	8.79015	11.7428	0	0	3.83406	3.83406	3.83406	1.70294	3.937	5.99751	8.23157
6288.9	0	0.316228	1.73205	3.31662	6.50922	3.31662	7.67552	4.39524	6.50922	6.82545	1.54919	1.54919	7.67552	7.67552	12.8861	0.316228	0.316228	4.77717	4.77717	4.77717	2.19089	3.44964	6.6573	7.91605
6352.5	0	0.948683	0.316228	2.81069	4.34115	2.81069	7.30513	2.96087	4.65738	4.65738	1.54919	2.46982	7.30513	7.30513	9.03304	0	0	4.02492	4.02492	4.02492	1.87083	4.86329	6.3183	8.67831
6413.3	0	0.547723	0.547723	2.88097	5.29068	2.88097	7.55002	2.18881	4.74296	5.29068	1.41421	1.89737	7.55002	7.55002	9.42006	0.547723	0.547723	4.74296	4.74296	4.74296	1.04881	4.03733	6.73451	9.72303
6475.4	0	1.04881	0.894427	3.33167	4.86935	3.64789	8.36158	3.57771	4.86935	4.86935	1.34164	2.32379	8.6778	8.6778	13.0732	0	0	3.97492	3.97492	3.97492	1.14018	3.937	4.35693	7.15376
6540.6	0	0	1.30384	3.50714	5.27876	3.50714	8.69366	2.60768	5.27876	5.27876	1.30384	1.58114	8.69366	8.69366	11.3013	0	0	3.97492	3.97492	3.97492	1.67332	3.2249	6.12153	7.67311
6602.4	1.09545	1.09545	1.64317	4.44972	5.69803	4.44972	10.9303	4.3353	4.05486	4.60258	1.51658	2.42899	9.83488	10.9303	13.2013	0.547723	0.547723	4.05486	4.05486	4.05486	2.54951	1.84391	6.22204	5.51644
6667.7	0	0.632456	0.632456	3.86005	4.13959	3.86005	9.08499	3.4813	4.13959	4.13959	1.54919	2.23607	9.08499	9.08499	11.9658	0	0	3.50714	3.50714	3.50714	1.22474	3.33167	5.79814	7.90507
6726	0	0.547723	0	3.44964	3.49285	3.44964	8.79753	3.86936	4.04057	4.04057	1.3784	1.48324	8.79753	8.79753	12.0631	0	0	3.49285	3.49285	3.49285	2.54951	3.67423	6.14151	7.26623
6797.4	0	0.948683	1.04881	3.79473	5.06129	4.56933	8.46378	3.53141	5.06129	5.06129	1.3784	2.34521	9.23838	9.23838	12.4402	0	0	4.01248	4.01248	4.01248	1.48324	3.61939	5.45166	7.58782
6879.8	0	0.316228	1.09545	3.56371	5.09545	3.56371	8.49321	3.66674	5.7279	5.7279	1.41421	1.97484	8.49321	8.49321	13.145	0	0	4	4	4	0.547723	3.60256	5.46141	8.20003
6971	0	0.707107	1.70294	3.68782	6.35973	3.68782	8.86469	3.5923	5.65262	6.35973	1.34164	2.16795	8.86469	8.86469	13.366	0.707107	0.707107	4.65679	4.65679	4.65679	2.60768	2.40832	6.33717	6.13781
7060.3	0	0	1.34164	3.52136	5.9111	3.52136	9.14275	2.99281	5.27864	5.9111	1.09545	2.28035	9.14275	9.14275	12.3818	0.632456	0.632456	4.56946	4.56946	4.56946	1.44914	3.58731	4.68713	6.50908
7142.7	0	0	1.30384	3.43511	6.41835	3.43511	8.25175	3.76449	5.58169	6.41835	1.64317	2.09762	8.25175	8.25175	12.1241	0.83666	0.83666	5.11451	5.11451	5.11451	1	2.62679	6.39285	8.01964
7233.1	0	1.22474	1	3.52136	4.91152	3.52136	8.77493	4.5925	4.91152	4.91152	2.30217	2.54951	8.77493	9.40739	12.6977	0	0	3.91152	3.91152	3.91152	0.632456	2.92391	5.22393	7.19916
7320.7	0	0	1.97484	3.937	6.52256	3.937	8.53048	3.73754	5.97484	6.52256	1.70294	1.97484	8.53048	8.53048	13.247	0.547723	0.547723	4.54772	4.54772	4.54772	0.547723	2.09762	6.5542	8.10409
7403.5	0	0.316228	1.3784	3.42053	5.96078	3.73675	8.23716	4.13218	5.64455	5.96078	2.12132	2.04939	8.55339	8.55339	11.9427	0.316228	0.316228	4.58237	4.58237	4.58237	0.632456	2	6.56957	7.93712
7489.2	0	1	1.89737	3.76829	5.88485	3.76829	8.94516	4.25046	5.88485	5.88485	1.64317	2.25832	8.94516	8.94516	14.7147	0	0	3.98748	3.98748	3.98748	1.26491	1.14018	5.82539	5.70065
7570.4	0	0.774597	2.07364	3.27109	7.79558	3.27109	8.29105	3.26556	7.38696	8.57018	0.547723	2.48998	8.29105	8.29105	14.2657	1.18322	1.18322	5.72194	5.72194	5.72194	0	0.894427	5.3385	6.23293
7654.4	0	0.316228	1.22474	3.39116	5.62929	3.39116	7.91886	3.18668	5.62929	5.62929	1.41421	2.12132	7.91886	7.91886	12.0115	0	0	4.40454	4.40454	4.40454	0.316228	2	6.99046	8.67423
7743.6	0	0.447214	1	3.47851	5.50555	3.92572	8.97396	4.21091	5.95277	5.95277	1.64317	2.38747	9.42117	9.42117	12.5417	0	0	4.50555	4.50555	4.50555	0	1.30384	5.27337	6.57721
7844.7	0	0.316228	0.894427	3.28634	5.99599	3.28634	8.58728	2.94271	5.10156	5.99599	0.894427	2.46982	8.58728	8.58728	11.53	0.894427	0.894427	5.10156	5.10156	5.10156	1.18322	2.04939	6.87952	7.7457
7949.9	0	1.14018	1.81659	4.17133	5.92755	4.17133	9.06009	4.36269	6.76421	6.76421	1.54919	0	9.06009	9.06009	13.6902	0	0	4.11096	4.11096	4.11096	0	1.26491	6.30711	7.57202
8054.9	0	1.04881	1.30384	3.25576	5.68562	3.80349	7.66031	5.09672	6.46022	6.46022	1.81659	2.32379	8.20803	8.20803	13.0189	0	1.18322	4.38178	5.565	4.38178	0	1.04881	6.91902	7.96783
8160.3	0	1.22474	1.22474	3.47851	5.67446	3.47851	8.52826	4.28482	5.67446	5.67446	1.78885	2.42899	8.52826	8.52826	12.249	0	0	4.44972	4.44972	4.44972	0	1.48324	5.54685	7.03009
8273.2	0	0	1.18322	3.53553	4.64732	3.53553	8.8647	3.64611	5.19504	5.19504	1.54919	2.46982	8.8647	8.8647	12.1448	0	0	3.4641	3.4641	3.4641	0	0.774597	6.76443	7.53902
8378.1	0	0.316228	0.83666	3.89872	4.21883	4.53117	9.46648	3.74961	3.9026	4.21883	1.41421	2.38747	10.0989	10.0989	12.6385	0.316228	0.316228	3.6984	3.6984	3.6984	0	1.41421	6.08256	7.49678
8480	0	0.83666	1.18322	3.89872	5.00421	3.89872	8.58913	4.31226	5.32044	5.32044	1.94936	2.79285	8.58913	8.58913	12.7677	0	0	3.82099	3.82099	3.82099	0.316228	1	6.39719	7.08096
8585	0	1.26491	0.632456	4.13521	3.72743	4.13521	9.51109	3.3143	2.89077	3.72743	2.04939	2.12132	9.51109	9.51109	12.5486	0.83666	0.83666	3.09498	3.09498	3.09498	0	0.83666	7.04221	7.87887
8675.8	0	0.632456	1.41421	3.91152	3.85176	3.91152	9.1746	4.13946	3.53553	3.85176	2.32379	2.62679	9.1746	9.1746	12.4045	0.316228	0.316228	2.43755	2.43755	2.43755	0	1.51658	6.8896	8.40618
8742.9	0	0.632456	0.632456	4.23084	3.04077	4.23084	9.75352	3.31603	3.357	3.357	1.81659	2.60768	9.75352	9.75352	12.7798	0	0	2.40832	2.40832	2.40832	0.894427	0.894427	7.18387	7.18387
8819.9	0	0.83666	1.26491	3.76829	3.67323	4.40074	8.70792	5.00243	4.30569	4.30569	1.76068	2.64575	9.34038	9.34038	13.5308	0	0	2.40832	2.40832	2.40832	0	1.26491	6.92165	8.18657
8899.1	0	1	1.41421	3.64692	4.67987	4.27937	9.11501	4.71997	3.84321	4.67987	2.30217	2.48998	9.74746	9.74746	13.2632	0.83666	0.83666	3.26565	3.26565	3.26565	0.83666	0	7.01039	6.17373
8976.4	0.632456	0.948683	1.9741	4.08656	4.3193	4.08656	10.4896	5.21969	3.68685	3.68685	1.78885	2.46982	9.85718	10.4896	15.7251	0	0	2.34521	2.34521	2.34521	0.632456	0.632456	6.17127	6.17127
9056.2	0	0.774597	1.92354	4.07431	3.92354	4.07431	9.93093	4.0348	4.47126	4.47126	1.84391	3.01662	9.93093	9.93093	14.0454	0	0	2	2	2	0.316228	0.774597	5.65473	6.1131
9134.6	0	0.632456	1.76068	4.12311	4.00045	4.43933	10.1064	4.42288	3.68422	4.00045	1.48324	3.08221	10.4226	10.4226	14.8067	0.316228	0.316228	2.23977	2.23977	2.23977	0	1.14018	4.64165	5.78183
9215.1	0	0	1.89737	3.937	4.92492	3.937	9.46873	4.71086	4.72071	5.55737	1.67332	2.89828	9.46873	9.46873	14.4036	0.83666	0.83666	3.02755	3.02755	3.02755	0	0	6.54333	6.54333
9300	0	1.04881	0	3.84708	3.34938	3.84708	9.35162	3.65958	3.34938	3.66561	1.84391	3.14643	9.35162	9.35162	11.4835	0.316228	0.316228	3.34938	3.34938	3.34938	0.316228	1.04881	6.34363	7.07621
9380.6	0	1	1.14018	3.96232	3.30812	3.96232	9.43955	5.13193	3.30812	3.30812	2.42899	2.72029	9.43955	9.43955	13.2827	0	0	2.16795	2.16795	2.16795	0	0.632456	6	6.63246
9448.2	0	1.30384	1.51658	4.51664	4.37311	5.29123	10.0303	6.22714	3.96449	5.14771	2.19089	3.17805	10.8049	10.8049	15.5831	1.18322	1.18322	2.85654	2.85654	2.85654	0.316228	0	4.87355	4.55732
9492.5	0	0.83666	1.94936	3.72827	4.99013	4.0445	9.04804	5.22238	4.35768	4.99013	1.73205	2.40832	9.36427	9.36427	14.4877	0.632456	0.632456	3.04077	3.04077	3.04077	0	0.83666	6.41625	7.25291
9543	0	1.26491	0.83666	3.42053	3.7347	3.42053	9.2343	5.23856	2.78602	3.41847	1.94936	2.73861	9.2343	9.55053	13.0439	0.632456	0.632456	2.58181	2.58181	2.58181	0	1.14018	6.03044	7.17062
9595.4	0	0.83666	1.58114	3.54965	5.07112	3.86588	9.62418	3.34107	4.07112	5.07112	1	3.50714	9.94041	9.94041	13.5464	1	1	3.48998	3.48998	3.48998	0	0.316228	4.40957	4.72579
9646.3	0	0.547723	1.30384	3.82099	3.90095	3.82099	9.24317	3.71849	3.35323	3.90095	1.18322	2.96648	9.24317	9.24317	13.0823	0.547723	0.547723	2.59711	2.59711	2.59711	0	0	6.59397	6.59397
9698.9	0	1.26491	1.64317	3.40588	4.98981	3.72211	8.80958	5.36133	4.15315	4.98981	1.26491	3.2249	9.12581	9.12581	15.1816	0.83666	0.83666	3.34664	3.34664	3.34664	0	1.26491	5.50184	6.76675
9753.9	0	0.894427	2.14476	4	5.03919	4	9.10882	5.49754	4.91936	5.81378	1.48324	3.17805	9.10882	9.10882	15.2679	0.894427	0.894427	2.89443	2.89443	2.89443	0	0	6.05254	6.05254
9808.1	0	0.948683	2.46982	3.49285	5.36786	3.49285	8.57222	4.50398	4.7354	5.68409	1.64317	2.64575	8.57222	8.57222	15.1276	0.948683	0.948683	2.89804	2.89804	2.89804	0	0	6.13955	6.13955
9864.3	0	0.316228	2.58844	3.87298	5.50124	3.87298	9.86464	4.91568	5.64338	6.27584	2.02485	2.79285	9.86464	9.86464	15.9764	0.632456	0.632456	2.91281	2.91281	2.91281	0	0.632456	4.41918	5.05163
9918.5	0	1.14018	1.58114	4.50555	3.25446	4.50555	10.0643	4.20314	3.88691	3.88691	0.632456	2.28035	10.0643	10.0643	15.2162	0	0	1.67332	1.67332	1.67332	0.316228	1.3784	6.06076	7.12294
9973.7	0	0.774597	2.44949	4.07431	5.92128	4.84891	9.97346	4.72378	4.61744	5.92128	1.30384	3.30151	10.7481	10.7481	16.0698	1.30384	1.30384	3.47179	3.47179	3.47179	0	0	3.69683	3.69683
10028.9	0	0.632456	1.87083	4.26615	4.6009	4.26615	10.0971	4.594	3.96845	4.6009	1.94936	3.36155	10.0971	10.0971	14.9288	0.632456	0.632456	2.73007	2.73007	2.73007	0	0.632456	3.8137	4.44616
10086.4	0	0.83666	1.76068	3.91152	3.76068	3.91152	9.90318	5.434	4.76068	4.76068	1.67332	2.64575	9.90318	9.90318	15.4245	0	0	2	2	2	0.316228	0.316228	5.69497	5.69497
10146.6	0	0.316228	1	4.67974	3.31623	4.67974	10.157	3.32715	3	3.31623	1.48324	3.31662	10.157	10.157	13.6333	0.316228	0.316228	2.31623	2.31623	2.31623	0	1.48324	5.19688	6.68012
10209.3	0	0.632456	2.19089	3.39116	4.57674	3.39116	9.23069	3.87223	3.74008	4.57674	1.14018	3.03315	9.23069	9.23069	14.4699	0.83666	0.83666	2.38585	2.38585	2.38585	0	1.44914	6.36769	7.81683
10266.1	0	1.41421	2.36643	3.84708	4.75806	3.84708	9.07202	3.45834	4.21034	4.75806	0.948683	3.08221	9.07202	9.07202	14.8968	0.547723	0.547723	2.39163	2.39163	2.39163	0	0.547723	5.82267	6.37039
10333.3	0	0.948683	2.25832	3.54965	4.62394	3.86588	9.78663	3.41994	4.30771	4.62394	0.948683	3.4641	10.1029	10.1029	14.8324	0.316228	0.316228	2.36562	2.36562	2.36562	0	0	4.51749	4.51749
10408	2.58844	0	4.2316	4.23084	6.96914	4.23084	12.6072	6.55072	3.43202	4.38071	1.22474	3	10.0188	12.9234	16.9879	0.948683	0.948683	2.73754	2.73754	2.73754	0.316228	0.316228	4.63671	4.63671
10482.1	0	1	1.92354	4.20714	4.3999	4.20714	9.5923	3.39314	3.76745	4.3999	1	3.04959	9.5923	9.5923	14.2252	0.632456	0.632456	2.47636	2.47636	2.47636	0	1.15289	5.91545	6.75211
10558.4	0	2	1.92354	4.03733	3.22738	4.03733	9.79059	3.84938	3.7751	3.7751	1.76068	2.66458	9.79059	9.79059	14.5774	0	0	1.30384	1.30384	1.30384	0	1.22474	5.88949	7.11423
10631.4	1.48324	1.54919	2.86164	4.07431	5.24005	4.91097	11.6403	6.66478	2.75681	3.75681	1.3784	3.53553	10.9937	12.477	17.1381	1	1	2.3784	2.3784	2.3784	0.632456	0	4.20175	3.5693
10709	0.316228	1.30384	2.68266	3.89872	5.60618	3.89872	10.3468	5.03486	5.11587	6.06455	0.948683	2.36643	10.0306	10.3468	16.7994	0.948683	0.948683	2.92353	2.92353	2.92353	0	0	4.37373	4.37373

## Sheet: PFTs_codes
Code	Plant functional type	Included taxa
ar.cd.mb.eds	arctic cold-dediduous malacophyll broad-leaved erect dwarf shrub	Betula, Polygonaceae, Rosaceae, Juncaceae
ar.cd.mb.pds	arctic cold-dediduous malacophyll broad-leaved prostrate dwarf shrub	Betula, Salix, Polygonaceae, Rosaceae
ar.cd.mb.lhs	arctic cold-dediduous malacophyll broad-leaved low and high shrub	Alnus
ar.fb	arctic forb	Apiaceae, Brassicaceae, Caryophyllaceae, Cyperaceae, Fabaceae, Geraniaceae, Iridaceae, Lamiaceae, Liliaceae, Polygonaceae, Ranunculaceae, Saxifragaceae, Scrophulariaceae, Thalictrum, Valerianaceae, Asteraceae, Campanulaceae, Polemonium, Juncaceae
bo.d.n.t	boreal deciduous needle-leaved tree	Larix
bo.e.n.t	boreal evergreen needle-leaved tree	Abies, Pinus sibirica, Picea
bo.cd.mb.lhs	boreal cold-deciduous malacophyll broad-leaved low and high shrub	Betula, Salix, Ericaceae, Alnus, Lonicera
bo.cd.mb.t	boreal cold-deciduous malacophyll broad-leaved low and high shrub	Betula, Populus, Salix, Alnus
bo.e.n.lhs	boreal evergreen needle-leaved low and high shrub	Pinus sibirica
bo.e.mb.lhs	boreal evergreen malacophyll broad-leaved low and high shrub	Ericaceae
c-te.e.n.t	cool-temperate evergreen needle-leaved tree	Pinus sylvestris, Picea, Abies
di.sl.lhs	drought-intolerant small-leaved low and high shrub	Ericaceae
dt.sl.lhs	drought-tolerant small-leaved low and high shrub	Amaranthaceae, Fabaceae, Euphorbiaceae, Artemisia
eu.e.n.t	eurythermic evergreen needle-leaved tree	Pinaceae, Pinus, Pinus sylvestris
eu-dt.fb	eurythermic drought-tolerant forb	Alliaceae, Amaranthaceae, Limonium, Asteraceae, Artemisia, Juncaceae
ft.ml.lhs	frost-tolerant micro-leaved low and high shrub_	Ephedraceae
g	grass	Poaceae
ha	halophyte	Amaranthaceae, Asteraceae
lsuc	leaf succulent	Amaranthaceae
rc.fb	rosette or cushion forb	Caryophyllaceae, Fabaceae, Geraniaceae, Saxifragiaceae, Asteraceae, Artemisia, Amaranthaceae, Plantaginaceae
s	sedge	Cyperaceae
sl.t	small-leaved tree	Caprifoliaceae, Euphorbiaceae
te.cd.mb.lhs	temperate cold-deciduous malacophyll broad-leaved low and high shrub	Betula, Salix, Ericaceae, Fabaceae, Lamiaceae, Malvaceae, Rosaceae, Scrophulariaceae, Verbenaceae, Caprifoliaceae, Euphorbiaceae, Scabiosa, Onagraceae
te-dt.fb	temperate drought-tolerant forb	Apiaceae, Artemisia, Brassicaceae, Caryophyllaceae, Convolvulaceae, Fabaceae, Geraniaceae, Iridaceae, Lamiaceae, Linaceae, Liliaceae, Polygonaceae, Rosaceae, Saxifragaceae, Scrophulariaceae, Thalictrum, Asteraceae, Campanulaceae, Polemonium, Amaranthaceae, Ranunculaceae, Juncaceae, Plantaginaceae, Onagraceae
te-ft.cd.mb.t	temperate (spring-frost tolerant) cold-deciduous malacophyll broad-leaved tree	Betula, Populus, Salix, Ulmus, Tilia, Alnus
te-fi.cd.mb.t	temperate (spring-frost intolerant) cold-deciduous malacophyll broad-leaved tree	Populus, Salix, Carpinus, Juglandaceae, Tilia, Caprifoliaceae, Ulmus
te-fa.cd.mb.t	temperate (spring-frorest avoiding) cold-deciduous malacophyll broad-leaved tree)	Salix, Carpinus, Ulmus, Verbenaceae, Euphorbiaceae
wt.e.mb.lhs	warm temperate evergreen malacophyll broad-leaved low and high shrub	Ericaceae, Scrophulariaceae, Thymelaeaceae, Verbenaceae, Caprifoliaceae, Euphorbiaceae, Fabaceae
wt.e.mb.t	warm-temperate evergreen malacophyll broad-leaved tree	Thymelaeaceae, Verbenaceae, Alnus
wt.cd.mb.lhs	warm-temperate cold-deciduous malacophyll broad-leaved low and high shrub	Fabaceae, Linaceae, Malvaceae, Rosaceae, Thymelaeaceae, Urticaceae, Verbenaceae, Caprifoliaceae, Euphorbiaceae, Lonicera
wt.cd.mb.t	warm-temperate cold-deciduous malacophyll broad-leaved tree	Juglandaceae, Thymelaeaceae, Verbenaceae, Caprifoliaceae, Euphorbiaceae
wt.e.sb.t	warm-temperate evergreen sclerophyll broad-leaved tree	Euphorbiaceae
wt.e.sb.lhs	warm-temperate evergreen sclerophyll broad-leaved low and high shrub	Euphorbiaceae
