# Supplementary material
Source: Research Square preprint supplement (doi:10.21203/rs.3.rs-9540103/v1)
Supplement: Supplementary file 2 [file 35f37243e09d63eac60ee86e.xlsx]

## Sheet: Br_Rb
Depth, calibrated age (cal yr BP, where BP = before 1950 CE), and Br/Rb ratio from the composite sediment core of Lake Nizhnee Multa. The age-depth model is based on ¹⁴C dating and ¹³⁷Cs marker (1962 CE). Br/Rb was measured by μ-XRF at 1 mm resolution (~4-year temporal resolution). Interpolated to uniform depth steps.	Depth, cm	Year, BP	Br/Rb
	0	-70	0.12041
	0.1071	-63.8634	0.111676
	0.2142	-57.7242	0.11297
	0.3213	-51.5823	0.113115
	0.4284	-45.4377	0.103743
	0.5355	-39.2904	0.0982437
	0.6426	-33.1404	0.0964913
	0.7497	-26.9877	0.098078
	0.8568	-20.8324	0.0886161
	0.9639	-14.6744	0.0674294
	1.071	-8.51368	0.0924295
	1.1781	-2.35029	0.0889341
	1.2852	3.81577	0.0838389
	1.3923	9.98452	0.0834948
	1.4994	16.1559	0.0897142
	1.6065	22.3301	0.102023
	1.7136	28.5068	0.0926223
	1.8207	34.6863	0.0748081
	1.9278	40.8685	0.0826358
	2.0349	47.0533	0.0906681
	2.142	53.2408	0.0777787
	2.2491	59.431	0.0775755
	2.3562	65.6239	0.0689295
	2.4633	71.8195	0.0897894
	2.5704	78.0177	0.0818911
	2.6775	84.2186	0.0571184
	2.7846	90.4223	0.0792058
	2.8917	96.6285	0.0673252
	2.9919	102.437	0.0539383
	3.09795	108.588	0.0610554
	3.204	114.741	0.0656815
	3.31005	120.897	0.0550353
	3.4161	127.055	0.0492916
	3.52215	133.217	0.0533665
	3.6282	139.38	0.0554628
	3.73425	145.547	0.0470459
	3.8403	151.716	0.0555605
	3.94635	157.887	0.0488856
	4.0524	164.061	0.049382
	4.15845	170.238	0.0439875
	4.2645	176.418	0.0454512
	4.37055	182.6	0.0515931
	4.4766	188.785	0.0385921
	4.58265	194.972	0.0338536
	4.6887	201.162	0.0282359
	4.79475	207.355	0.036212
	4.9008	213.55	0.0372557
	5.00685	219.748	0.0279282
	5.085	224.317	0.0309725
	5.19	230.458	0.0311912
	5.295	236.602	0.0205595
	5.4	242.748	0.0187415
	5.505	248.897	0.0140887
	5.61	255.048	0.0131148
	5.715	261.202	0.0262922
	5.82	267.358	0.0179592
	5.925	273.517	0.0117262
	6.03	279.679	0.0101058
	6.135	285.843	0.00653154
	6.24	292.01	0.00892868
	6.345	298.18	0.011788
	6.45	304.352	0.0130448
	6.555	310.526	0.0144219
	6.66	316.703	0.0144856
	6.765	322.883	0.034489
	6.87	329.065	0.0214503
	6.975	335.25	0.0248205
	7.08	341.438	0.0322554
	7.185	347.628	0.0181614
	7.29	353.82	0.0226236
	7.395	360.015	0.0229588
	7.5	366.213	0.00988456
	7.605	372.413	0.0219543
	7.71	378.616	0.0367889
	7.815	384.822	0.0364379
	7.92	391.03	0.0306915
	8.025	397.241	0.0243724
	8.13	403.454	0.0182614
	8.235	409.67	0.0215919
	8.34	415.888	0.0317709
	8.445	422.109	0.0229152
	8.55	428.332	0.0344594
	8.655	434.559	0.03959
	8.76	440.787	0.0290614
	8.865	447.018	0.0369455
	8.97	453.252	0.03696
	9.075	459.489	0.03872
	9.18	465.728	0.0400117
	9.285	471.969	0.0667913
	9.39	478.213	0.0404885
	9.495	484.46	0.0441015
	9.6	490.71	0.0365941
	9.705	496.961	0.0107099
	9.81	503.216	0.0112695
	9.915	509.473	0.0262465
	10.02	515.733	0.00799031
	10.125	521.995	0.0176
	10.23	528.259	0.00259358
	10.335	534.527	0.004847
	10.44	540.797	0.0197813
	10.545	547.069	0.0225182
	10.65	553.344	0.0117745
	10.755	559.622	0.0258493
	10.86	565.902	0.00981221
	10.965	572.185	0.0116893
	11.07	578.47	0.00411576
	11.175	584.758	0.02112
	11.28	591.049	0.00308231
	11.385	597.342	0.0188124
	11.49	603.638	0.0176965
	11.595	609.936	0.0151166
	11.7	616.237	0.0140633
	11.805	622.54	0.0233628
	11.91	628.846	0.0153377
	12.015	635.155	0.00979592
	12.12	641.466	0.0144136
	12.225	647.78	0.0147217
	12.33	654.096	0.01056
	12.435	660.415	0.0073029
	12.54	666.737	0.01408
	12.645	673.061	0.0176
	12.75	679.387	0.0291742
	12.855	685.717	0.0425445
	12.96	692.048	0.0264582
	13.065	698.383	0.0476114
	13.17	704.72	0.0312391
	13.275	711.059	0.0421485
	13.38	717.401	0.0498888
	13.485	723.746	0.0469803
	13.59	730.093	0.0389648
	13.695	736.443	0.0394366
	13.8	742.795	0.045235
	13.905	749.15	0.0281279
	14.01	755.508	0.0529685
	14.115	761.868	0.0565247
	14.22	768.231	0.0412769
	14.325	774.596	0.0376675
	14.43	780.964	0.0530507
	14.535	787.334	0.0615918
	14.64	793.708	0.0603868
	14.745	800.083	0.0564384
	14.85	806.461	0.0486553
	14.955	812.842	0.0468205
	15.06	819.225	0.0702158
	15.165	825.611	0.0521893
	15.27	832	0.0411004
	15.375	838.391	0.0465608
	15.48	844.785	0.0688968
	15.585	851.181	0.0535859
	15.69	857.58	0.0512081
	15.795	863.981	0.0531365
	15.9	870.385	0.0641458
	16.005	876.792	0.0508873
	16.11	883.201	0.0241964
	16.215	889.612	0.0523983
	16.32	896.027	0.046696
	16.425	902.443	0.0548186
	16.53	908.863	0.0480644
	16.635	915.285	0.0601756
	16.74	921.71	0.0548996
	16.845	928.137	0.0578536
	16.95	934.566	0.0455667
	17.055	940.999	0.0503364
	17.16	947.434	0.0578024
	17.265	953.871	0.0535097
	17.37	960.311	0.0434494
	17.475	966.754	0.064785
	17.58	973.199	0.0569303
	17.685	979.647	0.0608574
	17.79	986.097	0.0540479
	17.895	992.55	0.054908
	18	999.006	0.0612982
	18.105	1005.46	0.0595878
	18.21	1011.92	0.0479598
	18.315	1018.39	0.0533139
	18.42	1024.85	0.0528755
	18.525	1031.32	0.0375122
	18.63	1037.79	0.0397881
	18.735	1044.27	0.0342279
	18.84	1050.74	0.0557611
	18.945	1057.22	0.0402216
	19.05	1063.7	0.0289557
	19.155	1070.19	0.0285045
	19.26	1076.67	0.0430333
	19.365	1083.16	0.0426339
	19.47	1089.65	0.0387225
	19.575	1096.15	0.0474689
	19.68	1102.64	0.0234908
	19.785	1109.14	0.0380035
	19.89	1115.65	0.0546272
	19.995	1122.15	0.0381672
	20.1	1128.66	0.0325926
	20.205	1135.17	0.0361892
	20.31	1141.68	0.0230145
	20.415	1148.19	0.0213438
	20.52	1154.71	0.033015
	20.625	1161.23	0.0591796
	20.73	1167.75	0.0395089
	20.835	1174.28	0.0467753
	20.94	1180.81	0.0582906
	21.045	1187.34	0.0526331
	21.15	1193.87	0.0600414
	21.255	1200.41	0.0630372
	21.36	1206.94	0.0755445
	21.465	1213.48	0.0706436
	21.57	1220.03	0.0363809
	21.675	1226.57	0.051604
	21.78	1233.12	0.0666711
	21.885	1239.67	0.0524069
	21.99	1246.23	0.0556962
	22.095	1252.78	0.0528
	22.2	1259.34	0.043549
	22.305	1265.9	0.0379814
	22.41	1272.46	0.046909
	22.515	1279.03	0.0427036
	22.62	1285.6	0.0837802
	22.725	1292.17	0.0532384
	22.83	1298.75	0.0541538
	22.935	1305.32	0.0440755
	23.04	1311.9	0.0536549
	23.145	1318.48	0.0507807
	23.25	1325.07	0.0601859
	23.355	1331.65	0.0409302
	23.46	1338.24	0.0553325
	23.565	1344.84	0.0612998
	23.67	1351.43	0.0307503
	23.775	1358.03	0.0426741
	23.88	1364.63	0.0746667
	23.985	1371.23	0.0496926
	24.09	1377.84	0.0656716
	24.195	1384.44	0.0482275
	24.3	1391.05	0.0614177
	24.405	1397.67	0.0580858
	24.51	1404.28	0.0573449
	24.615	1410.9	0.0477496
	24.72	1417.52	0.0589804
	24.825	1424.14	0.0819579
	24.93	1430.77	0.0723376
	25.035	1437.4	0.0745174
	25.14	1444.03	0.05848
	25.245	1450.66	0.0583858
	25.35	1457.3	0.044426
	25.455	1463.94	0.0634795
	25.56	1470.58	0.038675
	25.665	1477.22	0.057004
	25.77	1483.87	0.0616
	25.875	1490.52	0.0771418
	25.98	1497.17	0.112131
	26.085	1503.82	0.0885337
	26.19	1510.48	0.0797583
	26.295	1517.14	0.0893529
	26.4	1523.8	0.0763834
	26.505	1530.46	0.0812308
	26.61	1537.13	0.0711368
	26.715	1543.8	0.073872
	26.82	1550.47	0.0472316
	26.925	1557.15	0.0674154
	27.03	1563.82	0.0595866
	27.135	1570.5	0.0762254
	27.24	1577.19	0.0689954
	27.345	1583.87	0.0844303
	27.45	1590.56	0.0718616
	27.555	1597.25	0.0704
	27.66	1603.94	0.0665721
	27.765	1610.64	0.0620513
	27.87	1617.33	0.0746667
	27.975	1624.03	0.0616
	28.08	1630.74	0.0695231
	28.185	1637.44	0.0533728
	28.29	1644.15	0.056994
	28.395	1650.86	0.0666426
	28.5	1657.57	0.0701245
	28.605	1664.29	0.0645354
	28.71	1671.01	0.0535521
	28.815	1677.73	0.0543874
	28.92	1684.45	0.0602235
	29.025	1691.18	0.0541926
	29.13	1697.91	0.0623521
	29.235	1704.64	0.0423222
	29.34	1711.37	0.0353738
	29.445	1718.11	0.0383442
	29.55	1724.85	0.0469681
	29.655	1731.59	0.0614029
	29.76	1738.33	0.04
	29.865	1745.08	0.0511518
	29.97	1751.83	0.0477288
	30.075	1758.58	0.0518625
	30.18	1765.34	0.0653732
	30.285	1772.09	0.0730796
	30.39	1778.85	0.0550414
	30.495	1785.62	0.0897546
	30.6	1792.38	0.073822
	30.705	1799.15	0.0775546
	30.81	1805.92	0.0615785
	30.915	1812.69	0.0705331
	31.02	1819.47	0.0607367
	31.125	1826.24	0.0538353
	31.23	1833.02	0.0497021
	31.335	1839.81	0.0545328
	31.44	1846.59	0.0703148
	31.545	1853.38	0.0602176
	31.65	1860.17	0.0807687
	31.755	1866.96	0.0779457
	31.86	1873.76	0.0739992
	31.965	1880.56	0.0722434
	32.07	1887.36	0.0903556
	32.175	1894.16	0.076278
	32.28	1900.97	0.0774467
	32.385	1907.78	0.0634284
	32.49	1914.59	0.0872841
	32.595	1921.4	0.084204
	32.7	1928.22	0.0921182
	32.805	1935.04	0.0866652
	32.91	1941.86	0.091481
	33.015	1948.68	0.09714
	33.12	1955.51	0.0897588
	33.225	1962.34	0.0845877
	33.33	1969.17	0.0830606
	33.435	1976.01	0.0640185
	33.54	1982.84	0.0617036
	33.645	1989.68	0.0695533
	33.75	1996.53	0.0774874
	33.855	2003.37	0.0657895
	33.96	2010.22	0.08
	34.065	2017.07	0.0948993
	34.17	2023.92	0.0797176
	34.275	2030.77	0.0858661
	34.38	2037.63	0.0705209
	34.485	2044.49	0.0838095
	34.59	2051.36	0.0724239
	34.695	2058.22	0.0829469
	34.8	2065.09	0.0779016
	34.905	2071.96	0.0808412
	35.01	2078.83	0.0721478
	35.115	2085.71	0.0617457
	35.22	2092.59	0.05984
	35.325	2099.47	0.0594708
	35.43	2106.35	0.0707775
	35.535	2113.24	0.0830924
	35.64	2120.12	0.07957
	35.745	2127.02	0.0852955
	35.85	2133.91	0.0755387
	35.955	2140.81	0.0811329
	36.06	2147.7	0.0705828
	36.165	2154.61	0.0822291
	36.27	2161.51	0.0876433
	36.375	2168.42	0.093617
	36.48	2175.33	0.0656597
	36.585	2182.24	0.0766335
	36.69	2189.15	0.0997299
	36.795	2196.07	0.0705613
	36.9	2202.99	0.0596788
	37.005	2209.91	0.0773277
	37.11	2216.84	0.101529
	37.215	2223.76	0.0686435
	37.32	2230.69	0.0652048
	37.425	2237.62	0.106701
	37.53	2244.56	0.106086
	37.635	2251.5	0.108568
	37.74	2258.44	0.0680372
	37.845	2265.38	0.084004
	37.95	2272.33	0.114039
	38.055	2279.27	0.103559
	38.16	2286.22	0.0919088
	38.265	2293.18	0.0995452
	38.37	2300.13	0.0901373
	38.475	2307.09	0.0916151
	38.58	2314.05	0.0923362
	38.685	2321.01	0.0852973
	38.79	2327.98	0.0936117
	38.895	2334.95	0.06896
	39	2341.92	0.0748597
	39.105	2348.89	0.0664253
	39.21	2355.87	0.077673
	39.315	2362.85	0.0963884
	39.42	2369.83	0.0889692
	39.525	2376.81	0.0781518
	39.63	2383.8	0.0925274
	39.735	2390.79	0.0815669
	39.84	2397.78	0.0800247
	39.945	2404.78	0.0931701
	40.05	2411.77	0.0992534
	40.155	2418.77	0.0896296
	40.26	2425.77	0.0923783
	40.365	2432.78	0.0825666
	40.47	2439.79	0.119397
	40.575	2446.79	0.10638
	40.68	2453.81	0.0877805
	40.785	2460.82	0.0861895
	40.89	2467.84	0.0786847
	40.995	2474.86	0.112014
	41.1	2481.88	0.0969956
	41.205	2488.91	0.0710071
	41.31	2495.94	0.0627709
	41.415	2502.97	0.0840541
	41.52	2510	0.073701
	41.625	2517.03	0.0905466
	41.73	2524.07	0.0668598
	41.835	2531.11	0.0494168
	41.94	2538.16	0.0648625
	42.045	2545.2	0.0478684
	42.15	2552.25	0.0599256
	42.255	2559.3	0.0655867
	42.36	2566.35	0.0694085
	42.465	2573.41	0.0673483
	42.57	2580.47	0.113165
	42.675	2587.53	0.0994385
	42.78	2594.59	0.0818483
	42.885	2601.66	0.0988947
	42.99	2608.73	0.0771608
	43.095	2615.8	0.0973913
	43.2	2622.88	0.116486
	43.305	2629.95	0.0916719
	43.41	2637.03	0.102841
	43.515	2644.11	0.0729311
	43.62	2651.2	0.064907
	43.725	2658.28	0.0842105
	43.83	2665.37	0.072493
	43.935	2672.47	0.077816
	44.04	2679.56	0.104379
	44.145	2686.66	0.0882385
	44.25	2693.76	0.0923388
	44.355	2700.86	0.105379
	44.46	2707.97	0.137087
	44.565	2715.07	0.118702
	44.67	2722.18	0.111005
	44.775	2729.3	0.113434
	44.88	2736.41	0.088
	44.985	2743.53	0.0838363
	45.09	2750.65	0.080644
	45.195	2757.77	0.0834123
	45.3	2764.9	0.0817735
	45.405	2772.03	0.0817882
	45.51	2779.16	0.0738146
	45.615	2786.29	0.0784056
	45.72	2793.43	0.0697497
	45.825	2800.57	0.0732195
	45.93	2807.71	0.0581686
	46.035	2814.85	0.0497237
	46.14	2822	0.0783759
	46.245	2829.15	0.0873495
	46.35	2836.3	0.0777863
	46.455	2843.45	0.0899479
	46.56	2850.61	0.0893212
	46.665	2857.77	0.0721395
	46.77	2864.93	0.0807881
	46.875	2872.09	0.0862747
	46.98	2879.26	0.0999618
	47.085	2886.43	0.0767582
	47.19	2893.6	0.0932512
	47.295	2900.78	0.0903008
	47.4	2907.96	0.0996448
	47.505	2915.14	0.0997512
	47.61	2922.32	0.100383
	47.715	2929.5	0.103916
	47.82	2936.69	0.104605
	47.925	2943.88	0.0919556
	48.03	2951.07	0.0975812
	48.135	2958.27	0.0765902
	48.24	2965.47	0.0907636
	48.345	2972.67	0.100988
	48.45	2979.87	0.0917563
	48.555	2987.08	0.0868656
	48.66	2994.28	0.0848875
	48.765	3001.49	0.0918713
	48.87	3008.71	0.105537
	48.975	3015.92	0.0952831
	49.08	3023.14	0.0913579
	49.185	3030.36	0.101163
	49.29	3037.59	0.10336
	49.395	3044.81	0.0999076
	49.5	3052.04	0.127236
	49.605	3059.27	0.118309
	49.71	3066.51	0.105066
	49.815	3073.74	0.0959664
	49.92	3080.98	0.107743
	50.025	3088.22	0.114491
	50.13	3095.47	0.106115
	50.235	3102.72	0.0994239
	50.34	3109.97	0.0949405
	50.445	3117.22	0.103074
	50.55	3124.47	0.110618
	50.655	3131.73	0.105832
	50.76	3138.99	0.135248
	50.865	3146.25	0.0846776
	50.97	3153.52	0.108325
	51.075	3160.78	0.0825623
	51.18	3168.05	0.120982
	51.285	3175.33	0.120938
	51.39	3182.6	0.113104
	51.495	3189.88	0.112404
	51.6	3197.16	0.126528
	51.705	3204.44	0.121316
	51.81	3211.73	0.116408
	51.915	3219.02	0.131688
	52.02	3226.31	0.144292
	52.125	3233.6	0.117418
	52.23	3240.9	0.118006
	52.335	3248.19	0.127236
	52.44	3255.49	0.103565
	52.545	3262.8	0.10078
	52.65	3270.1	0.0952011
	52.755	3277.41	0.120459
	52.86	3284.72	0.135229
	52.965	3292.04	0.154829
	53.07	3299.36	0.136615
	53.175	3306.67	0.0863165
	53.28	3314	0.115292
	53.385	3321.32	0.119073
	53.49	3328.65	0.134565
	53.595	3335.98	0.171379
	53.7	3343.31	0.121357
	53.805	3350.64	0.146268
	53.91	3357.98	0.122389
	54.015	3365.32	0.122966
	54.12	3372.66	0.0993604
	54.225	3380.01	0.165712
	54.33	3387.35	0.089485
	54.435	3394.7	0.114573
	54.54	3402.06	0.112545
	54.645	3409.41	0.113702
	54.75	3416.77	0.121931
	54.855	3424.13	0.12123
	54.96	3431.49	0.123497
	55.065	3438.86	0.115305
	55.17	3446.23	0.142145
	55.275	3453.6	0.105943
	55.38	3460.97	0.0998835
	55.485	3468.34	0.118533
	55.59	3475.72	0.134053
	55.695	3483.1	0.116276
	55.8	3490.49	0.0985135
	55.905	3497.87	0.111863
	56.01	3505.26	0.100311
	56.115	3512.65	0.108346
	56.22	3520.05	0.11574
	56.325	3527.44	0.116023
	56.43	3534.84	0.127402
	56.535	3542.24	0.116412
	56.64	3549.65	0.121113
	56.745	3557.05	0.10306
	56.85	3564.46	0.114713
	56.955	3571.88	0.122926
	57.06	3579.29	0.104425
	57.165	3586.71	0.126352
	57.27	3594.13	0.108431
	57.375	3601.55	0.118238
	57.48	3608.97	0.12305
	57.585	3616.4	0.12179
	57.69	3623.83	0.126507
	57.795	3631.26	0.129184
	57.9	3638.7	0.146624
	58.005	3646.14	0.116952
	58.11	3653.58	0.109878
	58.215	3661.02	0.114514
	58.32	3668.46	0.135776
	58.425	3675.91	0.120123
	58.53	3683.36	0.125266
	58.635	3690.82	0.11604
	58.74	3698.27	0.139848
	58.845	3705.73	0.135208
	58.95	3713.19	0.127984
	59.055	3720.65	0.118276
	59.16	3728.12	0.142705
	59.265	3735.59	0.124591
	59.37	3743.06	0.129546
	59.475	3750.53	0.150518
	59.58	3758.01	0.145818
	59.685	3765.49	0.131852
	59.79	3772.97	0.135055
	59.895	3780.45	0.120227
	60	3787.94	0.124642
	60.105	3795.43	0.0951539
	60.21	3802.92	0.130622
	60.315	3810.42	0.139851
	60.42	3817.91	0.133426
	60.525	3825.41	0.113713
	60.63	3832.91	0.139747
	60.735	3840.42	0.134576
	60.84	3847.93	0.134836
	60.945	3855.44	0.144324
	61.05	3862.95	0.144553
	61.155	3870.46	0.121415
	61.26	3877.98	0.129462
	61.365	3885.5	0.131139
	61.47	3893.02	0.121399
	61.575	3900.55	0.131117
	61.68	3908.08	0.139526
	61.785	3915.61	0.136234
	61.89	3923.14	0.129249
	61.995	3930.67	0.148964
	62.1	3938.21	0.156952
	62.205	3945.75	0.12831
	62.31	3953.3	0.133789
	62.415	3960.84	0.131364
	62.52	3968.39	0.156
	62.625	3975.94	0.152945
	62.73	3983.5	0.153815
	62.835	3991.05	0.130911
	62.94	3998.61	0.13867
	63.045	4006.17	0.151374
	63.15	4013.74	0.137248
	63.255	4021.3	0.163629
	63.36	4028.87	0.133845
	63.465	4036.44	0.128169
	63.57	4044.02	0.111684
	63.675	4051.59	0.142417
	63.78	4059.17	0.135601
	63.885	4066.76	0.13492
	63.99	4074.34	0.135681
	64.095	4081.93	0.159761
	64.2	4089.52	0.134311
	64.305	4097.11	0.116186
	64.41	4104.7	0.145471
	64.515	4112.3	0.155216
	64.62	4119.9	0.171865
	64.725	4127.5	0.136918
	64.83	4135.11	0.147872
	64.935	4142.72	0.142176
	65.04	4150.33	0.117164
	65.145	4157.94	0.130904
	65.25	4165.56	0.146667
	65.355	4173.17	0.138999
	65.46	4180.79	0.160451
	65.565	4188.42	0.170616
	65.67	4196.04	0.182095
	65.775	4203.67	0.147613
	65.88	4211.3	0.171041
	65.985	4218.94	0.159028
	66.09	4226.57	0.171872
	66.195	4234.21	0.190622
	66.3	4241.85	0.167723
	66.405	4249.5	0.176
	66.51	4257.14	0.193198
	66.615	4264.79	0.17642
	66.72	4272.44	0.148323
	66.825	4280.1	0.174039
	66.93	4287.75	0.162675
	67.035	4295.41	0.155408
	67.14	4303.07	0.165369
	67.245	4310.74	0.154692
	67.35	4318.41	0.191941
	67.455	4326.08	0.160225
	67.56	4333.75	0.1438
	67.665	4341.42	0.178041
	67.77	4349.1	0.138301
	67.875	4356.78	0.140163
	67.98	4364.46	0.138443
	68.085	4372.15	0.144759
	68.19	4379.83	0.162145
	68.295	4387.52	0.176907
	68.4	4395.22	0.126278
	68.505	4402.91	0.136898
	68.61	4410.61	0.158311
	68.715	4418.31	0.182298
	68.82	4426.01	0.171638
	68.925	4433.72	0.202071
	69.03	4441.43	0.156624
	69.135	4449.14	0.14015
	69.24	4456.85	0.177968
	69.345	4464.57	0.169034
	69.45	4472.29	0.207172
	69.555	4480.01	0.190854
	69.66	4487.73	0.129266
	69.765	4495.46	0.158433
	69.87	4503.19	0.20043
	69.975	4510.92	0.17439
	70.08	4518.65	0.146868
	70.185	4526.39	0.153414
	70.29	4534.13	0.15213
	70.395	4541.87	0.181154
	70.5	4549.61	0.196381
	70.605	4557.36	0.191732
	70.71	4565.11	0.137725
	70.815	4572.86	0.215942
	70.92	4580.62	0.167907
	71.025	4588.38	0.177447
	71.13	4596.13	0.192547
	71.235	4603.9	0.193808
	71.34	4611.66	0.144224
	71.445	4619.43	0.165843
	71.55	4627.2	0.140137
	71.655	4634.97	0.134518
	71.76	4642.75	0.169083
	71.865	4650.53	0.178479
	71.97	4658.31	0.189852
	72.075	4666.09	0.183333
	72.18	4673.87	0.179557
	72.285	4681.66	0.160329
	72.39	4689.45	0.197186
	72.495	4697.25	0.183403
	72.6	4705.04	0.19335
	72.705	4712.84	0.18671
	72.81	4720.64	0.161341
	72.915	4728.45	0.137827
	73.02	4736.25	0.169629
	73.125	4744.06	0.177826
	73.23	4751.87	0.146464
	73.335	4759.69	0.179592
	73.44	4767.5	0.185394
	73.545	4775.32	0.16007
	73.65	4783.14	0.200682
	73.755	4790.97	0.160148
	73.86	4798.79	0.222807
	73.965	4806.62	0.156149
	74.07	4814.46	0.186563
	74.175	4822.29	0.221399
	74.28	4830.13	0.202236
	74.385	4837.97	0.154313
	74.49	4845.81	0.210048
	74.595	4853.65	0.19844
	74.7	4861.5	0.235894
	74.805	4869.35	0.201846
	74.91	4877.2	0.193131
	75.015	4885.06	0.210435
	75.12	4892.92	0.202071
	75.225	4900.78	0.183383
	75.33	4908.64	0.160354
	75.435	4916.51	0.159382
	75.54	4924.37	0.198151
	75.645	4932.25	0.155921
	75.75	4940.12	0.168654
	75.855	4947.99	0.167075
	75.96	4955.87	0.143474
	76.065	4963.75	0.12459
	76.17	4971.64	0.162295
	76.275	4979.52	0.135326
	76.38	4987.41	0.156874
	76.485	4995.3	0.137218
	76.59	5003.2	0.168082
	76.695	5011.09	0.139554
	76.8	5018.99	0.156947
	76.905	5026.89	0.147986
	77.01	5034.8	0.165442
	77.115	5042.7	0.160423
	77.22	5050.61	0.1584
	77.325	5058.53	0.151685
	77.43	5066.44	0.160267
	77.535	5074.36	0.140887
	77.64	5082.28	0.172221
	77.745	5090.2	0.187625
	77.85	5098.12	0.130532
	77.955	5106.05	0.144819
	78.06	5113.98	0.124244
	78.165	5121.91	0.165577
	78.27	5129.85	0.151724
	78.375	5137.79	0.13561
	78.48	5145.73	0.168479
	78.585	5153.67	0.18157
	78.69	5161.62	0.140656
	78.795	5169.56	0.152235
	78.9	5177.51	0.160901
	79.005	5185.47	0.156979
	79.11	5193.42	0.155621
	79.215	5201.38	0.154501
	79.32	5209.34	0.144538
	79.425	5217.3	0.160203
	79.53	5225.27	0.156594
	79.635	5233.24	0.164205
	79.74	5241.21	0.160878
	79.845	5249.18	0.16791
	79.95	5257.16	0.185433
	80.055	5265.14	0.148202
	80.16	5273.12	0.151208
	80.265	5281.11	0.177629
	80.37	5289.09	0.16866
	80.475	5297.08	0.163883
	80.58	5305.07	0.170123
	80.685	5313.07	0.165024
	80.79	5321.06	0.149991
	80.895	5329.06	0.174795
	81	5337.07	0.134943
	81.105	5345.07	0.131841
	81.21	5353.08	0.183432
	81.315	5361.09	0.17195
	81.42	5369.1	0.169035
	81.525	5377.12	0.180181
	81.63	5385.13	0.214595
	81.735	5393.15	0.20245
	81.84	5401.18	0.148395
	81.945	5409.2	0.190407
	82.05	5417.23	0.196276
	82.155	5425.26	0.1936
	82.26	5433.29	0.2024
	82.365	5441.33	0.2112
	82.47	5449.37	0.21296
	82.575	5457.41	0.216938
	82.68	5465.45	0.176
	82.785	5473.5	0.170904
	82.89	5481.54	0.182331
	82.995	5489.6	0.172284
	83.1	5497.65	0.210815
	83.205	5505.71	0.224257
	83.31	5513.76	0.200225
	83.415	5521.83	0.203996
	83.52	5529.89	0.218752
	83.625	5537.96	0.209
	83.73	5546.03	0.216525
	83.835	5554.1	0.205372
	83.94	5562.17	0.191942
	84.045	5570.25	0.198646
	84.15	5578.33	0.204632
	84.255	5586.41	0.209588
	84.36	5594.49	0.188866
	84.465	5602.58	0.221834
	84.57	5610.67	0.220439
	84.675	5618.76	0.209068
	84.78	5626.86	0.220496
	84.885	5634.96	0.203585
	84.99	5643.06	0.228549
	85.095	5651.16	0.208669
	85.2	5659.26	0.193891
	85.305	5667.37	0.195556
	85.41	5675.48	0.17685
	85.515	5683.59	0.190473
	85.62	5691.71	0.173327
	85.725	5699.83	0.176254
	85.83	5707.95	0.185439
	85.935	5716.07	0.153424
	86.04	5724.2	0.199654
	86.145	5732.33	0.187161
	86.25	5740.46	0.168283
	86.355	5748.59	0.177231
	86.46	5756.73	0.195208
	86.565	5764.87	0.167001
	86.67	5773.01	0.178219
	86.775	5781.15	0.176062
	86.88	5789.3	0.13503
	86.985	5797.45	0.159934
	87.09	5805.6	0.18123
	87.195	5813.75	0.193494
	87.3	5821.91	0.179255
	87.405	5830.07	0.176408
	87.51	5838.23	0.192582
	87.615	5846.4	0.146627
	87.72	5854.56	0.143121
	87.825	5862.73	0.196349
	87.93	5870.9	0.17614
	88.035	5879.08	0.188566
	88.14	5887.26	0.201356
	88.245	5895.44	0.169463
	88.35	5903.62	0.181796
	88.455	5911.8	0.182942
	88.56	5919.99	0.189229
	88.665	5928.18	0.178222
	88.77	5936.37	0.162137
	88.875	5944.57	0.165888
	88.98	5952.77	0.182689
	89.085	5960.97	0.212453
	89.19	5969.17	0.183676
	89.295	5977.38	0.223146
	89.4	5985.59	0.175996
	89.505	5993.8	0.192944
	89.61	6002.01	0.178021
	89.715	6010.23	0.190405
	89.82	6018.44	0.204286
	89.925	6026.67	0.230346
	90.03	6034.89	0.241709
	90.135	6043.12	0.195526
	90.24	6051.35	0.203546
	90.345	6059.58	0.183476
	90.45	6067.81	0.1848
	90.555	6076.05	0.183455
	90.66	6084.29	0.174732
	90.765	6092.53	0.212498
	90.87	6100.77	0.196886
	90.975	6109.02	0.209478
	91.08	6117.27	0.153747
	91.185	6125.52	0.121097
	91.29	6133.78	0.193032
	91.395	6142.03	0.192991
	91.5	6150.29	0.216964
	91.605	6158.56	0.214413
	91.71	6166.82	0.228028
	91.815	6175.09	0.206591
	91.92	6183.36	0.189594
	92.025	6191.63	0.195107
	92.13	6199.91	0.196023
	92.235	6208.18	0.185024
	92.34	6216.47	0.196103
	92.445	6224.75	0.19194
	92.55	6233.03	0.187926
	92.655	6241.32	0.177333
	92.76	6249.61	0.207701
	92.865	6257.91	0.181153
	92.97	6266.2	0.180391
	93.075	6274.5	0.166925
	93.18	6282.8	0.166843
	93.285	6291.11	0.16374
	93.39	6299.41	0.157947
	93.495	6307.72	0.190575
	93.6	6316.03	0.210991
	93.705	6324.35	0.152327
	93.81	6332.66	0.163276
	93.915	6340.98	0.174644
	94.02	6349.3	0.15155
	94.125	6357.63	0.162589
	94.23	6365.95	0.152846
	94.335	6374.28	0.17017
	94.44	6382.62	0.166868
	94.545	6390.95	0.188414
	94.65	6399.29	0.19008
	94.755	6407.63	0.186658
	94.86	6415.97	0.163351
	94.965	6424.32	0.168444
	95.07	6432.66	0.123924
	95.175	6441.01	0.133968
	95.28	6449.37	0.118462
	95.385	6457.72	0.0830543
	95.49	6466.08	0.157206
	95.595	6474.44	0.142848
	95.7	6482.8	0.187833
	95.805	6491.17	0.19957
	95.91	6499.54	0.20385
	96.015	6507.91	0.185916
	96.12	6516.28	0.217626
	96.225	6524.66	0.166792
	96.33	6533.03	0.14945
	96.435	6541.41	0.185539
	96.54	6549.8	0.195902
	96.645	6558.18	0.184517
	96.75	6566.57	0.161904
	96.855	6574.96	0.1672
	96.96	6583.36	0.181226
	97.065	6591.76	0.157696
	97.17	6600.15	0.146229
	97.275	6608.56	0.145558
	97.38	6616.96	0.151209
	97.485	6625.37	0.165912
	97.59	6633.78	0.142423
	97.695	6642.19	0.170304
	97.8	6650.6	0.203415
	97.905	6659.02	0.195136
	98.01	6667.44	0.155906
	98.115	6675.86	0.171923
	98.22	6684.29	0.159288
	98.325	6692.71	0.113888
	98.43	6701.14	0.149292
	98.535	6709.58	0.148989
	98.64	6718.01	0.152575
	98.745	6726.45	0.151666
	98.85	6734.89	0.170879
	98.955	6743.33	0.157842
	99.06	6751.78	0.168183
	99.165	6760.23	0.154458
	99.27	6768.68	0.155548
	99.375	6777.13	0.168733
	99.48	6785.59	0.160883
	99.585	6794.04	0.183148
	99.69	6802.51	0.145738
	99.795	6810.97	0.168819
	99.9	6819.43	0.147806
	100.005	6827.9	0.162697
	100.11	6836.37	0.164267
	100.215	6844.85	0.148766
	100.32	6853.32	0.165374
	100.425	6861.8	0.179807
	100.53	6870.29	0.231287
	100.635	6878.77	0.213258
	100.74	6887.26	0.196087
	100.845	6895.75	0.166126
	100.95	6904.24	0.204998
	101.055	6912.73	0.157348
	101.16	6921.23	0.191826
	101.265	6929.73	0.19217
	101.37	6938.23	0.174632
	101.475	6946.74	0.164906
	101.58	6955.24	0.186071
	101.685	6963.75	0.18483
	101.79	6972.26	0.205855
	101.895	6980.78	0.174044
	102	6989.3	0.183904
	102.105	6997.82	0.157735
	102.21	7006.34	0.173672
	102.315	7014.87	0.205656
	102.42	7023.39	0.196621
	102.525	7031.92	0.167298
	102.63	7040.46	0.178893
	102.735	7048.99	0.188938
	102.84	7057.53	0.187981
	102.945	7066.07	0.195407
	103.05	7074.62	0.199199
	103.155	7083.16	0.178638
	103.26	7091.71	0.133998
	103.365	7100.26	0.124629
	103.47	7108.82	0.128015
	103.575	7117.37	0.143276
	103.68	7125.93	0.143971
	103.785	7134.49	0.172325
	103.89	7143.06	0.127985
	103.995	7151.62	0.159192
	104.1	7160.19	0.184186
	104.205	7168.76	0.159928
	104.31	7177.34	0.118787
	104.415	7185.91	0.162879
	104.52	7194.49	0.186154
	104.625	7203.08	0.163216
	104.73	7211.66	0.167948
	104.835	7220.25	0.176
	104.94	7228.84	0.195831
	105.045	7237.43	0.193407
	105.15	7246.03	0.202549
	105.255	7254.62	0.225146
	105.36	7263.22	0.167582
	105.465	7271.83	0.135989
	105.57	7280.43	0.170795
	105.675	7289.04	0.137587
	105.78	7297.65	0.175578
	105.885	7306.26	0.177479
	105.99	7314.88	0.183352
	106.095	7323.5	0.194694
	106.2	7332.12	0.183704
	106.305	7340.74	0.163922
	106.41	7349.37	0.168623
	106.515	7357.99	0.163582
	106.62	7366.63	0.171312
	106.725	7375.26	0.152152
	106.83	7383.9	0.155078
	106.935	7392.53	0.159677
	107.04	7401.18	0.176253
	107.145	7409.82	0.166306
	107.25	7418.47	0.164256
	107.355	7427.11	0.180436
	107.46	7435.77	0.186849
	107.565	7444.42	0.156209
	107.67	7453.08	0.169404
	107.775	7461.74	0.18924
	107.88	7470.4	0.153169
	107.985	7479.06	0.17397
	108.09	7487.73	0.205631
	108.195	7496.4	0.143345
	108.3	7505.07	0.132786
	108.405	7513.75	0.116781
	108.51	7522.43	0.163597
	108.615	7531.11	0.174154
	108.72	7539.79	0.16959
	108.825	7548.47	0.202761
	108.93	7557.16	0.210284
	109.035	7565.85	0.186653
	109.14	7574.54	0.167254
	109.245	7583.24	0.133767
	109.35	7591.94	0.165977
	109.455	7600.64	0.175429
	109.56	7609.34	0.140986
	109.665	7618.05	0.162919
	109.77	7626.76	0.168554
	109.875	7635.47	0.186881
	109.98	7644.18	0.180838
	110.085	7652.9	0.155457
	110.19	7661.61	0.171483
	110.295	7670.34	0.144863
	110.4	7679.06	0.155471
	110.505	7687.79	0.148531
	110.61	7696.52	0.149004
	110.715	7705.25	0.159205
	110.82	7713.98	0.16869
	110.925	7722.72	0.141352
	111.03	7731.46	0.137341
	111.135	7740.2	0.158373
	111.24	7748.94	0.1232
	111.345	7757.69	0.121039
	111.45	7766.44	0.142367
	111.555	7775.19	0.168571
	111.66	7783.95	0.16274
	111.765	7792.7	0.179106
	111.87	7801.46	0.160177
	111.975	7810.23	0.136258
	112.08	7818.99	0.125939
	112.185	7827.76	0.139032
	112.29	7836.53	0.127128
	112.395	7845.3	0.130212
	112.5	7854.08	0.135545
	112.605	7862.86	0.140552
	112.71	7871.64	0.187129
	112.815	7880.42	0.134784
	112.92	7889.21	0.135595
	113.025	7897.99	0.173612
	113.13	7906.78	0.151051
	113.235	7915.58	0.158895
	113.34	7924.37	0.138233
	113.445	7933.17	0.139424
	113.55	7941.97	0.152012
	113.655	7950.78	0.182642
	113.76	7959.58	0.140379
	113.865	7968.39	0.163239
	113.97	7977.2	0.128029
	114.075	7986.02	0.130168
	114.18	7994.84	0.142965
	114.285	8003.65	0.166642
	114.39	8012.48	0.131737
	114.495	8021.3	0.143229
	114.6	8030.13	0.129088
	114.705	8038.96	0.150022
	114.81	8047.79	0.123312
	114.915	8056.62	0.160757
	115.02	8065.46	0.172534
	115.125	8074.3	0.145098
	115.23	8083.14	0.128935
	115.335	8091.99	0.137794
	115.44	8100.84	0.181677
	115.545	8109.69	0.168229
	115.65	8118.54	0.164014
	115.755	8127.39	0.185138
	115.86	8136.25	0.20614
	115.965	8145.11	0.124382
	116.07	8153.98	0.151724
	116.175	8162.84	0.162192
	116.28	8171.71	0.142743
	116.385	8180.58	0.183206
	116.49	8189.45	0.197844
	116.595	8198.33	0.157344
	116.7	8207.21	0.161805
	116.805	8216.09	0.18107
	116.91	8224.97	0.12184
	117.015	8233.86	0.150637
	117.12	8242.75	0.191602
	117.225	8251.64	0.120049
	117.33	8260.53	0.149509
	117.422	8268.37	0.138683
	117.527	8277.27	0.133403
	117.632	8286.17	0.155837
	117.737	8295.07	0.142969
	117.842	8303.98	0.146495
	117.947	8312.89	0.121891
	118.052	8321.8	0.140829
	118.145	8329.65	0.149164
	118.25	8338.57	0.118612
	118.355	8347.49	0.124962
	118.46	8356.41	0.128804
	118.565	8365.34	0.109445
	118.67	8374.26	0.100085
	118.775	8383.19	0.0654244
	118.88	8392.12	0.114032
	118.985	8401.06	0.117906
	119.09	8410	0.122451
	119.195	8418.94	0.128898
	119.3	8427.88	0.0902317
	119.405	8436.82	0.0931969
	119.51	8445.77	0.143783
	119.615	8454.72	0.12833
	119.72	8463.67	0.120448
	119.825	8472.63	0.121475
	119.93	8481.59	0.159963
	120.035	8490.55	0.136106
	120.14	8499.51	0.145122
	120.245	8508.48	0.143545
	120.35	8517.44	0.133135
	120.455	8526.41	0.13018
	120.56	8535.39	0.131627
	120.665	8544.36	0.132747
	120.77	8553.34	0.13255
	120.875	8562.32	0.128613
	120.98	8571.31	0.128466
	121.085	8580.29	0.135357
	121.19	8589.28	0.146332
	121.295	8598.27	0.151083
	121.4	8607.27	0.147599
	121.505	8616.26	0.146869
	121.61	8625.26	0.159864
	121.715	8634.26	0.180185
	121.82	8643.27	0.166256
	121.925	8652.27	0.154935
	122.03	8661.28	0.165016
	122.135	8670.3	0.140541
	122.24	8679.31	0.142671
	122.345	8688.33	0.17042
	122.45	8697.35	0.141447
	122.555	8706.37	0.155879
	122.66	8715.39	0.126914
	122.765	8724.42	0.1659
	122.87	8733.45	0.136802
	122.975	8742.48	0.150083
	123.08	8751.52	0.173264
	123.185	8760.56	0.18021
	123.29	8769.6	0.196888
	123.395	8778.64	0.206315
	123.5	8787.69	0.180379
	123.605	8796.73	0.161695
	123.71	8805.78	0.164891
	123.815	8814.84	0.220193
	123.92	8823.89	0.19649
	124.025	8832.95	0.190358
	124.13	8842.01	0.16721
	124.235	8851.08	0.181584
	124.34	8860.14	0.167982
	124.445	8869.21	0.19588
	124.55	8878.28	0.195316
	124.655	8887.36	0.170228
	124.76	8896.43	0.147173
	124.865	8905.51	0.179592
	124.97	8914.59	0.165537
	125.075	8923.68	0.162028
	125.18	8932.76	0.16155
	125.285	8941.85	0.203886
	125.39	8950.94	0.192575
	125.495	8960.04	0.170532
	125.6	8969.14	0.173253
	125.705	8978.24	0.183414
	125.81	8987.34	0.157604
	125.915	8996.44	0.144833
	126.02	9005.55	0.175182
	126.125	9014.66	0.148733
	126.23	9023.77	0.15968
	126.335	9032.89	0.13605
	126.44	9042	0.128775
	126.545	9051.12	0.123749
	126.65	9060.25	0.142374
	126.755	9069.37	0.153003
	126.86	9078.5	0.160394
	126.965	9087.63	0.129735
	127.07	9096.76	0.118042
	127.175	9105.9	0.129602
	127.28	9115.04	0.126276
	127.385	9124.18	0.129959
	127.49	9133.32	0.142613
	127.595	9142.47	0.12475
	127.7	9151.62	0.123588
	127.805	9160.77	0.129042
	127.91	9169.92	0.132073
	128.015	9179.08	0.139458
	128.12	9188.24	0.132603
	128.225	9196.64	0.151585
	128.33	9202.85	0.134195
	128.435	9209.81	0.152846
	128.54	9216.76	0.1759
	128.645	9223.71	0.128081
	128.75	9230.66	0.181733
	128.855	9237.6	0.154936
	128.96	9244.54	0.177568
	129.065	9251.47	0.161132
	129.17	9258.4	0.161339
	129.275	9265.32	0.147944
	129.38	9272.24	0.128859
	129.485	9279.16	0.143408
	129.59	9286.07	0.130626
	129.695	9292.98	0.119818
	129.8	9299.88	0.116985
	129.905	9306.77	0.126336
	130.01	9313.67	0.146679
	130.115	9320.55	0.156368
	130.22	9327.44	0.133577
	130.325	9334.32	0.148904
	130.43	9341.19	0.170377
	130.535	9348.06	0.164324
	130.64	9354.93	0.140958
	130.745	9361.79	0.131961
	130.85	9368.64	0.140558
	130.955	9375.49	0.163895
	131.06	9382.34	0.142829
	131.165	9389.18	0.160475
	131.27	9396.02	0.156201
	131.375	9402.86	0.151058
	131.48	9409.68	0.129328
	131.585	9416.51	0.139912
	131.69	9423.33	0.127663
	131.795	9430.14	0.128636
	131.9	9436.96	0.117466
	132.005	9443.76	0.130865
	132.11	9450.56	0.121741
	132.215	9457.36	0.112715
	132.32	9464.15	0.132819
	132.425	9470.94	0.101884
	132.53	9477.73	0.104188
	132.635	9484.51	0.0967281
	132.74	9491.28	0.0948068
	132.845	9498.05	0.094909
	132.95	9504.82	0.102961
	133.055	9511.58	0.0737163
	133.16	9518.33	0.0977798
	133.265	9525.09	0.101211
	133.39	9533.12	0.0792825
	133.495	9539.86	0.0762761
	133.6	9546.6	0.101409
	133.705	9553.33	0.117628
	133.81	9560.06	0.0881647
	133.915	9566.78	0.105627
	134.02	9573.5	0.0967971
	134.145	9581.5	0.0723218
	134.25	9588.21	0.0830241
	134.355	9594.91	0.0825704
	134.46	9601.61	0.0861162
	134.565	9608.31	0.071784
	134.67	9615	0.0531012
	134.775	9621.69	0.0776317
	134.88	9628.37	0.0705497
	134.985	9635.05	0.0930663
	135.09	9641.72	0.150712
	135.195	9648.39	0.152598
	135.3	9655.06	0.158818
	135.405	9661.72	0.165083
	135.51	9668.37	0.154621
	135.615	9675.02	0.144681
	135.72	9681.67	0.129394
	135.825	9688.31	0.130885
	135.93	9694.95	0.129603
	136.035	9701.58	0.127063
	136.14	9708.21	0.13826
	136.245	9714.83	0.186387
	136.35	9721.45	0.178559
	136.432	9726.65	0.158416
	136.537	9733.26	0.136641
	136.642	9739.87	0.148808
	136.747	9746.47	0.15098
	136.852	9753.07	0.151715
	136.957	9759.66	0.158926
	137.062	9766.25	0.17579
	137.167	9772.83	0.167539
	137.272	9779.41	0.1746
	137.377	9785.99	0.177294
	137.482	9792.56	0.169302
	137.587	9799.12	0.181467
	137.692	9805.69	0.172704
	137.797	9812.24	0.158366
	137.902	9818.8	0.166524
	138.007	9825.34	0.152926
	138.112	9831.89	0.168197
	138.217	9838.43	0.176987
	138.322	9844.96	0.179334
	138.427	9851.49	0.167618
	138.532	9858.01	0.191063
	138.637	9864.54	0.166281
	138.742	9871.05	0.165589
	138.847	9877.56	0.16042
	138.952	9884.07	0.176786
	139.057	9890.57	0.159166
	139.162	9897.07	0.166236
	139.267	9903.57	0.177141
	139.372	9910.05	0.155191
	139.477	9916.54	0.160651
	139.582	9923.02	0.134152
	139.687	9929.49	0.157671
	139.792	9935.97	0.148914
	139.897	9942.43	0.167556
	140.002	9948.89	0.158802
	140.107	9955.35	0.147958
	140.212	9961.8	0.152647
	140.317	9968.25	0.168334
	140.422	9974.7	0.17862
	140.505	9979.76	0.145405
	140.61	9986.19	0.182783
	140.715	9992.62	0.151597
	140.842	10000.4	0.13628
	140.947	10006.8	0.140619
	141.052	10013.3	0.106338
	141.157	10019.7	0.133647
	141.262	10026.1	0.126579
	141.367	10032.5	0.12079
	141.472	10038.9	0.149659
	141.577	10045.3	0.134809
	141.682	10051.7	0.117283
	141.787	10058.1	0.130382
	141.892	10064.4	0.125068
	141.997	10070.8	0.132492
	142.125	10078.5	0.178692
	142.23	10084.9	0.13879
	142.335	10091.3	0.130095
	142.417	10096.3	0.147895
	142.522	10102.6	0.138698
	142.627	10109	0.1407
	142.732	10115.3	0.163345
	142.837	10121.7	0.144235
	142.965	10129.3	0.168197
	143.07	10135.7	0.160794
	143.175	10142	0.135113
	143.257	10147	0.143736
	143.362	10153.3	0.13566
	143.467	10159.6	0.134865
	143.572	10165.9	0.129897
	143.677	10172.2	0.140933
	143.782	10178.5	0.126659
	143.887	10184.8	0.16224
	143.992	10191.1	0.114889
	144.097	10197.4	0.108324
	144.202	10203.7	0.135126
	144.307	10209.9	0.13444
	144.412	10216.2	0.138266
	144.517	10222.5	0.124994
	144.622	10228.7	0.162472
	144.727	10235	0.152994
	144.832	10241.3	0.139141
	144.937	10247.5	0.135437
	145.042	10253.7	0.141074
	145.147	10260	0.142057
	145.252	10266.2	0.13592
	145.357	10272.5	0.14936
	145.462	10278.7	0.132259
	145.567	10284.9	0.158113
	145.672	10291.1	0.148027
	145.777	10297.3	0.15928
	145.882	10303.5	0.134746
	145.987	10309.8	0.162095
	146.092	10315.9	0.132947
	146.197	10322.1	0.134071
	146.302	10328.3	0.1306
	146.407	10334.5	0.150134
	146.512	10340.7	0.136369
	146.617	10346.9	0.125373
	146.722	10353.1	0.115628
	146.827	10359.2	0.124836
	146.932	10365.4	0.108614
	147.037	10371.5	0.125248
	147.142	10377.7	0.131961
	147.247	10383.8	0.143179
	147.352	10390	0.131329
	147.435	10394.8	0.130566
	147.54	10401	0.160122
	147.645	10407.1	0.116308
	147.75	10413.2	0.149209
	147.855	10419.3	0.134134
	147.96	10425.5	0.144124
	148.065	10431.6	0.157442
	148.17	10437.7	0.160849
	148.275	10443.8	0.131951
	148.38	10449.9	0.149292
	148.485	10456	0.154895
	148.59	10462.1	0.158993
	148.695	10468.2	0.123806
	148.8	10474.3	0.148928
	148.905	10480.3	0.153976
	149.01	10486.4	0.167197
	149.137	10493.8	0.157831
	149.242	10499.8	0.162464
	149.347	10505.9	0.156299
	149.452	10512	0.124473
	149.557	10518	0.129069
	149.64	10522.8	0.150463
	149.745	10528.8	0.157592
	149.85	10534.8	0.173375
	149.955	10540.9	0.155119
	150.06	10546.9	0.130693
	150.165	10552.9	0.160204
	150.27	10558.9	0.165182
	150.375	10565	0.129868
	150.48	10571	0.147973
	150.585	10577	0.140878
	150.69	10583	0.150276
	150.795	10589	0.13814
	150.9	10595	0.126169
	151.005	10600.9	0.136949
	151.11	10606.9	0.131385
	151.215	10612.9	0.14631
	151.32	10618.9	0.14689
	151.425	10624.9	0.1248
	151.53	10630.8	0.162771
	151.635	10636.8	0.159938
	151.74	10642.7	0.159938
	151.845	10648.7	0.159938
	151.95	10654.6	0.157106
	152.055	10660.6	0.12904
	152.16	10666.5	0.13765
	152.265	10672.5	0.149111
	152.37	10678.4	0.150536
	152.475	10684.3	0.151961
	152.58	10690.2	0.179387
	152.685	10696.1	0.149232
	152.79	10702.1	0.131984
	152.895	10708	0.144963
	153	10713.9	0.176564
	153.105	10719.8	0.136419
	153.21	10725.7	0.12344
