# Supplementary material
Source: Research Square preprint supplement (doi:10.21203/rs.3.rs-9540103/v1)
Supplement: Supplementary file 3 [file 3724caeb92e1d830093ef1b2.xlsx]

## Sheet: Tann_anom_meteo
Mean annual temperatures and temperature anomalies (meteorological data). Temperatures were converted to anomalies relative to the 1961–1990 baseline, based on the annual temperatures from Kara‑Tyurek and Ust‑Koksa. Anom_Altai is the mean of the two stations (for the period 2016–2008, based solely on Kara‑Tyurek).	Year AD	T_Kara-Tyurek	Anom_K-T	Mean 1961-1990	Year AD	T_Ust-Koksa	Anom_U-K	Mean 1961-1990		Year AD	Anom_Altai
	2016	-4.51667	1.24925	-5.76592	2008	0.466667	1.25699	-0.790323		2016	1.21117
	2015	-4.36667	1.39925		2007	0.833333	1.62366			2015	1.36117
	2014	-5.61667	0.149249		2006	1.1	1.89032			2014	0.111168
	2013	-4.55	1.21592		2005	-0.566667	0.223656			2013	1.17783
	2012	-5.05833	0.707582		2004	-0.075	0.715323			2012	0.669501
	2011	-4.575	1.19092		2003	-0.0333333	0.756989			2011	1.15283
	2010	-5.825	-0.0590848		2002	1.58333	2.37366			2010	-0.0971654
	2009	-4.78854	0.977374		2001	0.2	0.990323			2009	0.939293
	2008	-4.36667	1.39925		2000	0.075	0.865323			2008	1.29031
	2007	-3.875	1.89092		1999	0.433333	1.22366			2007	1.71947
	2006	-4.975	0.790915		1998	1.11667	1.90699			2006	1.30281
	2005	-5.08333	0.682582		1997	1.51667	2.30699			2005	0.415306
	2004	-4.56667	1.19925		1996	-1.125	-0.334677			2004	0.919473
	2003	-5.35	0.415915		1995	0.425	1.21532			2003	0.54864
	2002	-4.38333	1.38258		1994	0.616667	1.40699			2002	1.84031
	2001	-4.88333	0.882582		1993	-1.03333	-0.243011			2001	0.89864
	2000	-5.45833	0.307582		1992	0.025	0.815323			2000	0.54864
	1999	-4.675	1.09092		1991	0.683333	1.47366			1999	1.11947
	1998	-4.38333	1.38258		1990	0.7	1.49032			1998	1.60697
	1997	-3.38333	2.38258		1989	0.485417	1.27574			1997	2.30697
	1996	-6.25833	-0.492418		1988	0.491667	1.28199			1996	-0.45136
	1995	-4.61667	1.14925		1987	-0.4	0.390323			1995	1.14447
	1994	-5.36667	0.399249		1986	-0.833333	-0.0430108			1994	0.865306
	1993	-5.98333	-0.217418		1985	-1.4	-0.609677			1993	-0.268027
	1992	-5.08333	0.682582		1984	-2.8	-2.00968			1992	0.71114
	1991	-5.25833	0.507582		1983	-0.241667	0.548656			1991	0.952806
	1990	-4.24545	1.52046		1982	0.439583	1.22991			1990	1.46758
	1989	-4.43333	1.33258		1981	-1.34167	-0.551344			1989	1.26635
	1988	-5.325	0.440915		1980	-1.05	-0.259677			1988	0.82364
	1987	-6.125	-0.359085		1979	-0.383333	0.406989			1987	-0.0221938
	1986	-6.34375	-0.577835		1978	0.383333	1.17366			1986	-0.348235
	1985	-7.6375	-1.87158		1977	-0.3	0.490323			1985	-1.27844
	1984	-7.525	-1.75908		1976	-1.89167	-1.10134			1984	-1.92219
	1983	-5.3875	0.378415		1975	-0.883333	-0.0930108			1983	0.425723
	1982	-4.72083	1.04508		1974	-0.775	0.0153226			1982	1.09968
	1981	-5.09167	0.674249		1973	0	0.790323			1981	0.0236395
	1980	-5.1	0.665915		1972	-0.666667	0.123656			1980	0.165306
	1979	-5.525	0.240915		1971	-1.125	-0.334677			1979	0.28614
	1978	-4.93333	0.832582		1970	-1.40833	-0.618011			1978	0.965306
	1977	-5.25833	0.507582		1969	-2.94167	-2.15134			1977	0.46114
	1976	-6.45833	-0.692418		1968	-0.816667	-0.0263441			1976	-0.934694
	1975	-6.04167	-0.275751		1967	-2.35833	-1.56801			1975	-0.222194
	1974	-6.225	-0.459085		1966	-1.18333	-0.393011			1974	-0.259694
	1973	-5.66667	0.0992485		1965	0.325	1.11532			1973	0.406973
	1972	-6.56667	-0.800751		1964	-0.708333	0.0819892			1972	-0.37636
	1971	-5.575	0.190915		1963	-0.35	0.440323			1971	-0.109694
	1970	-6.65	-0.884085		1962	-0.0833333	0.706989			1970	-0.78886
	1969	-7.38333	-1.61742		1961	-1.46667	-0.676344			1969	-1.92219
	1968	-6.40833	-0.642418		1960	-1.91667	-1.12634			1968	-0.372194
	1967	-5.06667	0.699249		1959	-1.70833	-0.918011			1967	-0.472194
	1966	-6.29167	-0.525751		1958	-1.875	-1.08468			1966	-0.497194
	1965	-4.75833	1.00758		1957	-0.975	-0.184677			1965	1.02364
	1964	-6.075	-0.309085		1956	-2.60833	-1.81801			1964	-0.15136
	1963	-4.52083	1.24508		1955	-0.533333	0.256989			1963	0.80489
	1962	-4.77083	0.995082		1954	-2.825	-2.03468			1962	0.813223
	1961	-5.725	0.0409152		1953	-0.383333	0.406989			1961	-0.355527
	1960	-6.90833	-1.14242		1952	-2.61667	-1.82634			1960	-1.17219
	1959	-6.03333	-0.267418		1951	-0.825	-0.0346774			1959	-0.630527
	1958	-6.25	-0.484085		1950	-2.3	-1.50968			1958	-0.822194
	1957	-6.40833	-0.642418		1949	-1.39167	-0.601344			1957	-0.45136
	1956	-5.81667	-0.0507515		1948	-1.025	-0.234677			1956	-0.972194
	1955	-5.35833	0.407582		1947	-1.69583	-0.905511			1955	0.294473
	1954	-7.2	-1.43408		1946	-1.51042	-0.720094			1954	-1.77219
	1953	-5.1	0.665915		1945	-1.23333	-0.443011			1953	0.49864
	1952	-6.58333	-0.817418		1944	-2.34167	-1.55134			1952	-1.35969
	1951	-5.75833	0.00758187		1943	-1.725	-0.934677			1951	-0.0513605
	1950	-6.2	-0.434085		1942	-1.54167	-0.751344			1950	-1.00969
	1949	-6.29167	-0.525751		1941	-0.458333	0.331989			1949	-0.60136
	1948	-5.875	-0.109085		1940	-0.725	0.0653226			1948	-0.209694
	1947	-6	-0.234085							1947	-0.60761
	1946	-6.51667	-0.750751							1946	-0.773235
	1945	-5.225	0.540915							1945	0.0111395
	1944	-6.01667	-0.250751							1944	-0.93886
	1943	-5.85833	-0.0924181							1943	-0.55136
	1942	-5.84167	-0.0757515							1942	-0.45136
	1941	-5.11667	0.649249							1941	0.452806
	1940	-5.475	0.290915							1940	0.140306

## Sheet: Ust-Koksa
Mean monthly and annual temperatures, open-water and ice-covered season temperatures for Lake Multa, and temperature anomalies (based on Ust-Koksa weather station data).	Year	January	February	March	April	May	June	July	August	September	October	November	December	Annual mean	MJJASO mean	Anom_MJJASO	NDJFMA mean	Anom_ NDJFMA
	2008	-27	-17.8	-2.4	3.5	12.3	16.2	18.4	15.6	7.8	2.6	-6.1	-17.5	0.466667	12.15	1.59889	-9.01667	-9.01667
	2007	-17.5	-10.9	-8.5	6.4	9.6	14.4	17.9	15	9.8	0.4	-9.6	-17	0.833333	11.1833	0.632222	-10.1167	-10.1167
	2006	-18	-15.3	-4.3	3.5	8.9	15.3	16.2	13.7	8.9	2.2	-5.5	-12.4	1.1	10.8667	0.315556	-10.7333	-10.7333
	2005	-23.1	-22.5	-5.4	4.5	10	15	17.1	14.7	9.6	2.5	-7.6	-21.6	-0.566667	11.4833	0.932222	-11.75	-11.75
	2004	-25	-12.9	-7.1	3.7	12.1	15.2	16.5	13.9	8.9	1.5	-11.4	-16.3	-0.075	11.35	0.798889	-11.1833	-11.1833
	2003	-17.3	-15.9	-7.9	1.7	11.1	16.1	15.4	14.2	9.7	2	-10.6	-18.9	-0.0333333	11.4167	0.865556	-8.65	-8.65
	2002	-11.9	-10	-2.9	2.4	10.1	14.4	15.7	15.1	8.5	0.9	-5.1	-18.2	1.58333	10.7833	0.232222	-10.6167	-10.6167
	2001	-19.5	-16.2	-6.7	2	12.4	15.9	15.1	15.6	8.2	1.3	-5	-20.7	0.2	11.4167	0.865556	-10.2	-10.2
	2000	-21.2	-14.4	-6.1	6.2	10.5	15.2	16.6	15	9.4	-1.8	-15.2	-13.3	0.075	10.8167	0.265556	-11.8	-11.8
	1999	-18.6	-14.6	-12.6	3.5	12.3	14	18	15	8.1	2.3	-9.1	-13.1	0.433333	11.6167	1.06556	-10.6167	-10.6167
	1998	-24.8	-12.2	-6.8	2.3	10.3	16.6	17.9	18.1	9.6	3	-5.7	-14.9	1.11667	12.5833	2.03222	-7.86667	-7.86667
	1997	-16.3	-14.9	-4.1	8.7	12.5	15.7	16.9	14.5	9.8	3.6	-10.8	-17.4	1.51667	12.1667	1.61556	-13.2333	-13.2333
	1996	-23.3	-19	-9.8	0.9	10.3	14.2	17.5	14.1	7.7	-0.6	-10.2	-15.3	-1.125	10.5333	-0.0177778	-10.3167	-10.3167
	1995	-21	-14.7	-4.6	3.9	8.6	13.1	16.6	14.9	9.2	2.3	-8.2	-15	0.425	10.7833	0.232222	-10.7833	-10.7833
	1994	-19.6	-16.8	-8.1	3	9.8	16.4	16.4	13.3	7.2	0.7	-2.4	-12.5	0.616667	10.6333	0.0822222	-8.3	-8.3
	1993	-18	-12.3	-6.5	1.9	7.6	13.9	16.3	14.6	8.2	0.5	-17.1	-21.5	-1.03333	10.1833	-0.367778	-12.6167	-12.6167
	1992	-14.4	-18	-8.7	4	10.2	13.5	17.7	12.7	5.1	0.1	-8.6	-13.3	0.025	9.88333	-0.667778	-9.78333	-9.78333
	1991	-17.2	-15.9	-8.1	4.4	9.8	15.2	17.6	14.1	9.4	3.9	-7.3	-17.7	0.683333	11.6667	1.11556	-10.6	-10.6
	1990	-20.5	-15.5	-5.6	3	11.5	16	16	13.4	9.7	3.2	-8	-14.8	0.7	11.6333	1.08222	-9.75	-9.75
	1989	-16.1	-17	-4.9	2.3	9.6	14	15	14	9	2	-7	-13	0.658333	10.6	0.0488889	-9.61667	-9.61667
	1988	-20	-10.9	-9.6	2.8	8.2	13.8	15.5	13.9	10.5	1.3	-6	-13.6	0.491667	10.5333	-0.0177778	-9.25	-9.25
	1987	-16.1	-12.6	-9	1.8	9.5	12.7	17.4	15	8.9	-2.5	-14.4	-15.5	-0.4	10.1667	-0.384444	-12.1333	-12.1333
	1986	-20.6	-18.7	-6.3	2.7	10.7	13.8	16.5	14.2	9.8	-0.4	-16.4	-15.3	-0.833333	10.7667	0.215556	-13.05	-13.05
	1985	-21.7	-17.1	-11.8	4	8	12.2	16.1	13.2	7.5	0.1	-8.5	-18.8	-1.4	9.51667	-1.03444	-14.1667	-14.1667
	1984	-25.4	-23.4	-8.1	-0.8	9.8	13.5	14.3	13.1	8.7	1.4	-9.5	-27.2	-2.8	10.1333	-0.417778	-12.6167	-12.6167
	1983	-19.9	-16	-5.4	2.3	7.8	14	15.9	14.2	6.6	2.7	-6.6	-18.5	-0.241667	10.2	-0.351111	-10.0833	-10.0833
	1982	-15.9	-15.7	-9.2	5.4	11.5	16.1	16	14.3	9.5	1	-12	-18.3	0.225	11.4	0.848889	-12.05	-12.05
	1981	-22.4	-17.2	-7.1	4.7	11	14	15	14.5	8.5	-0.5	-15.9	-21.4	-1.4	10.4167	-0.134444	-14.6	-14.6
	1980	-21	-20.3	-11.6	2.6	11.6	13.3	15.2	14.4	9.3	0.9	-6.2	-20.8	-1.05	10.7833	0.232222	-12.05	-12.05
	1979	-19.2	-13.8	-10.7	-1.6	9.6	15.1	16.7	13.5	8.8	2.7	-9.5	-16.2	-0.383333	11.0667	0.515556	-10.7167	-10.7167
	1978	-21	-16	-6.4	4.8	9.2	16	16.5	11.5	10.1	0.7	-5.3	-15.5	0.383333	10.6667	0.115556	-11.65	-11.65
	1977	-28	-16	-9.1	4	9.4	16.5	15.7	13.4	10.3	2.4	-8.5	-13.7	-0.3	11.2833	0.732222	-11.15	-11.15
	1976	-20.8	-15	-11.8	2.9	10.4	15.6	13.6	13.9	8.1	-0.5	-16.1	-23	-1.89167	10.1833	-0.367778	-13.7167	-13.7167
	1975	-19.6	-17.3	-6.7	0.4	7.3	13.9	16.5	13.3	8.6	1.3	-9.2	-19.1	-0.883333	10.15	-0.401111	-11.4667	-11.4667
	1974	-20.5	-17.4	-7.5	4.9	12	14.9	19.4	15.4	7.4	-0.6	-10.1	-27.2	-0.775	11.4167	0.865556	-12.4	-12.4
	1973	-16.3	-17.4	-7.8	4.4	7.8	14.9	15.3	14	9.1	0.8	-7.1	-17.7	0	10.3167	-0.234444	-10.9833	-10.9833
	1972	-18.3	-18.3	-8.7	4.2	9.4	14.6	13.4	13.4	7.1	-0.1	-9	-15.7	-0.666667	9.63333	-0.917778	-11.9333	-11.9333
	1971	-18.6	-19.2	-11.9	2.8	7.8	14.6	15	13.1	8.6	1.6	-12.8	-14.5	-1.125	10.1167	-0.434444	-12.1333	-12.1333
	1970	-20.5	-15.2	-12.2	2.4	8.3	13.1	14.7	13.5	8.2	0.4	-10.8	-18.8	-1.40833	9.7	-0.851111	-15.3	-15.3
	1969	-29.3	-25	-10.6	2.7	7.8	14.8	17	11.6	6.9	0.4	-9.8	-21.8	-2.94167	9.75	-0.801111	-12.8333	-12.8333
	1968	-22.7	-17.9	-5.2	0.4	11.4	15.3	16.5	14.6	5.3	-0.1	-8.7	-18.7	-0.816667	10.5	-0.0511111	-12.9833	-12.9833
	1967	-25.7	-19.6	-8.9	3.7	12.7	13.7	15.3	11.9	6.4	1.9	-16	-23.7	-2.35833	10.3167	-0.234444	-13.3	-13.3
	1966	-18.3	-15.8	-7.3	1.3	8.3	14.4	16.1	15.4	11.3	0.1	-10.7	-29	-1.18333	10.9333	0.382222	-13.35	-13.35
	1965	-17.5	-18.1	-7.6	2.8	12.4	15.1	19.3	14.2	8.6	1.8	-6.8	-20.3	0.325	11.9	1.34889	-12.5667	-12.5667
	1964	-18.6	-25.8	-6.5	2.6	9.5	15	17.1	14	8.9	-2.4	-6.7	-15.6	-0.708333	10.35	-0.201111	-10.6	-10.6
	1963	-21.5	-15.8	-2.7	-1.3	9.3	14.1	16.3	14.5	7.3	1.5	-8.1	-17.8	-0.35	10.5	-0.0511111	-11.85	-11.85
	1962	-24	-18.2	-6.2	3.2	12.9	16	17.4	16.2	10.2	1.5	-13.3	-16.7	-0.0833333	12.3667	1.81556	-12.3833	-12.3833
	1961	-22.3	-16.1	-11	5.1	9.7	12	15.3	12.9	8.3	-2.8	-9.5	-19.2	-1.46667	9.23333	-1.31778	-11.9	-11.9
	1960	-18.7	-14.9	-10.8	1.7	6.7	13.3	13.9	12.8	7.9	-1.9	-12.4	-20.6	-1.91667	8.78333	-1.76778	-13.2167	-13.2167
	1959	-24.9	-17.2	-7.3	3.1	8.5	14.8	15.6	13.8	10.6	1.7	-16	-23.2	-1.70833	10.8333	0.282222	-15.15	-15.15
	1958	-24.1	-16.8	-10.9	0.1	8.4	10.4	14.7	14.2	7.3	1.1	-9.7	-17.2	-1.875	9.35	-1.20111	-12.7667	-12.7667
	1957	-22.9	-18.6	-8.9	0.7	7.3	15.5	14	12.3	8.7	1.3	-7.4	-13.7	-0.975	9.85	-0.701111	-13.3333	-13.3333
	1956	-28.2	-22.5	-11.1	2.9	9.5	12	16.2	13.7	7.8	2.2	-13.1	-20.7	-2.60833	10.2333	-0.317778	-14	-14
	1955	-23.3	-17	-10.9	1	11.2	17.6	16.5	15	7.6	-0.3	-7.8	-16	-0.533333	11.2667	0.715556	-13.2167	-13.2167
	1954	-24.9	-19.2	-13	1.6	5.3	14.4	14.8	15.1	8.7	0.7	-9.7	-27.7	-2.825	9.83333	-0.717778	-13.7333	-13.7333
	1953	-22.1	-18.6	-7.1	2.8	11.6	15.7	17.6	13.9	11.3	0.5	-12.1	-18.1	-0.383333	11.7667	1.21556	-15.1167	-15.1167
	1952	-22.6	-26	-11.8	-0.1	10.1	13.8	15.8	14.3	9.1	-0.5	-13.7	-19.8	-2.61667	10.4333	-0.117778	-14.2833	-14.2833
	1951	-24.7	-20.4	-10.4	3.3	12.5	15.5	17.7	12.5	10	0.6	-12.6	-13.9	-0.825	11.4667	0.915556	-13.25	-13.25
	1950	-19.5	-23.1	-8.1	-2.3	10.5	14.8	16.2	13	7.9	-1.3	-16.2	-19.5	-2.3	10.1833	-0.367778	-12.9	-12.9
	1949	-18.8	-16.4	-10.9	4.4	9.4	14.9	15.3	13.8	5.7	0.9	-12.1	-22.9	-1.39167	10	-0.551111	-13.15	-13.15
	1948	-19.3	-20.8	-7.5	3.7	9.1	12.9	17.3	13.8	7.4	0.8	-15.7	-14	-1.025	10.2167	-0.334444	-11.95	-11.95
	1947	-19	-16	-10	3	8.8	11	14.4	13	7.8	-0.5	-10	-21.8	-1.60833	9.08333	-1.46778	-12.3167	-12.3167
	1946	-18	-14.6	-12.7	3.2	8.8	12	16	12.1	7.3	1	-10	-20	-1.24167	9.53333	-1.01778	-14.3167	-14.3167
	1945	-22.3	-26	-11.7	4.1	12.9	15.6	15.3	15.5	8.9	2.5	-10.3	-19.3	-1.23333	11.7833	1.23222	-12.7833	-12.7833
	1944	-23.8	-21.3	-5.1	3.1	9.4	15.1	14.4	13.4	7.3	0.2	-14.3	-26.5	-2.34167	9.96667	-0.584444	-15.5167	-15.5167
	1943	-26.1	-18.1	-11.1	3	10.2	13.4	16.5	16.1	8.6	-0.3	-15.2	-17.7	-1.725	10.75	0.198889	-14.3167	-14.3167
	1942	-23.9	-23.2	-6.5	0.6	7.7	15.3	15.3	13.5	8.5	0.6	-8.3	-18.1	-1.54167	10.15	-0.401111	-11.2167	-11.2167
	1941	-18.8	-18.2	-6.7	2.8	9.3	15.5	15.2	13.8	8.8	2	-11.5	-17.7	-0.458333	10.7667	0.215556	-13.1667	-13.1667
	1940	-24.2	-18.8	-9.3	2.5	8.5	15	16.6	13.8	6.1	0.7	-8.7	-10.9	-0.725	10.1167	-0.434444	-9.8	-9.8

## Sheet: Kara-Tyurek
Mean monthly and annual temperatures; temperatures during the open-water season and ice-covered season of Lake Multa, based on data from the Kara-Tyurek weather station.	Year	January	February	March	April	May	June	July	August	September	October	November	December	Annual mean	MJJASO mean	Anom_MJJASO	NDJFMA mean	Anom_ NDJFMA
	2016	-14	-12.9	-8.5	-3.6	-2	6.4	8.6	6.3	4.4	-10.9	-14.3	-13.7	-4.51667	2.13333	14.2	-12.0667	-12.0667
	2015	-14.6	-13.3	-12.2	-4.3	0.9	7.1	8.8	7.1	-1.8	-4.5	-12.5	-13.1	-4.36667	2.93333	15	-12.7833	-12.7833
	2014	-16.3	-20.9	-9.6	-4.3	-1.2	4.8	6.9	7.3	0.1	-6.5	-12.9	-14.8	-5.61667	1.9	13.9667	-11.8333	-11.8333
	2013	-15.5	-17.3	-7	-3.5	-3	3.6	6.3	6	1	-3.9	-9	-12.3	-4.55	1.66667	13.7333	-11.5667	-11.5667
	2012	-17.8	-16.8	-10.3	-3.2	0.1	8.6	9.1	6.1	2.6	-6	-14.2	-18.9	-5.05833	3.41667	15.4833	-13.4667	-13.4667
	2011	-19.3	-14.2	-12	-2.2	-0.7	6.6	7.3	6.5	1.8	-3	-12.3	-13.4	-4.575	3.08333	15.15	-14.3667	-14.3667
	2010	-17.7	-20.5	-14.9	-7.4	-2.4	6.1	7.2	6.8	2.1	-3.5	-9.4	-16.3	-5.825	2.71667	14.7833	-12.5083	-12.5083
	2009	-17.6	-16.8375	-10.3	-4.6125	-0.8625	6.0125	7.975	6.1625	1.65	-4.3375	-10.2125	-14.5	-4.78854	2.76667	14.8333	-12.4521	-12.4521
	2008	-18.3	-17.4	-8.4	-5.9	2.2	6.9	9	6.6	-0.2	-3.4	-9.4	-14.1	-4.36667	3.51667	15.5833	-10.6333	-10.6333
	2007	-12.4	-13	-12.4	-2.5	-0.2	5	9.2	6.3	2.7	-6.5	-8.1	-14.6	-3.875	2.75	14.8167	-12.3167	-12.3167
	2006	-20.9	-13.8	-9.7	-6.8	-2.2	6.1	7	4.6	1.5	-4.9	-7.7	-12.9	-4.975	2.01667	14.0833	-12.3833	-12.3833
	2005	-18.9	-21.7	-7.7	-5.4	-0.7	5.2	8.7	6.4	1.7	-3.5	-11.6	-13.5	-5.08333	2.96667	15.0333	-11.9333	-11.9333
	2004	-14	-13.5	-14.2	-4.8	2.5	5.5	7.7	6.2	0.1	-4.4	-9.4	-16.5	-4.56667	2.93333	15	-12.7833	-12.7833
	2003	-12.8	-14.9	-13.8	-9.3	0.1	6.9	5.9	5.2	1.2	-4.5	-15.2	-13	-5.35	2.46667	14.5333	-11.9833	-11.9833
	2002	-13.6	-12.3	-10	-7.8	0.1	5.1	7.3	8	2.4	-5.1	-9.6	-17.1	-4.38333	2.96667	15.0333	-13.0667	-13.0667
	2001	-20.1	-16.3	-8.9	-6.4	3.2	6.8	6.2	7.9	-0.5	-5.3	-8.3	-16.9	-4.88333	3.05	15.1167	-12.1167	-12.1167
	2000	-18	-14.9	-11.2	-3.4	0.8	6	7.5	6.8	2.1	-9.7	-15.7	-15.8	-5.45833	2.25	14.3167	-13.8167	-13.8167
	1999	-16.1	-10.1	-19	-6.2	2.9	4.8	9.5	6.6	-0.7	-4.8	-10.1	-12.9	-4.675	3.05	15.1167	-12.0167	-12.0167
	1998	-17.2	-12.5	-12.2	-7.2	-0.3	6.9	8.4	9.4	1.2	-4.7	-11.5	-12.9	-4.38333	3.48333	15.55	-10.1	-10.1
	1997	-14.3	-15.5	-7.2	0.8	3.2	6	7	5.2	2.6	1.2	-14.1	-15.5	-3.38333	4.2	16.2667	-15	-15
	1996	-21.5	-14.4	-15.5	-9	0.3	4.3	8.8	5.5	-0.3	-6.8	-11.9	-14.6	-6.25833	1.96667	14.0333	-11.9167	-11.9167
	1995	-15.6	-11.8	-10.7	-6.9	-2.3	3.2	7.9	5.8	1.7	-5	-7.7	-14	-4.61667	1.88333	13.95	-12.4667	-12.4667
	1994	-16.1	-19	-11.1	-6.9	0	6.9	7.1	4.6	-1.9	-5.2	-7.8	-15	-5.36667	1.91667	13.9833	-11.8833	-11.8833
	1993	-15.7	-14.3	-11.6	-6.9	-3.6	3.9	6.9	5.4	-0.4	-5.4	-15.4	-14.7	-5.98333	1.13333	13.2	-12.4333	-12.4333
	1992	-12.2	-13.1	-13.6	-5.6	0	4.1	8	3.9	-4	-5.5	-8.3	-14.7	-5.08333	1.08333	13.15	-12.75	-12.75
	1991	-17	-15.9	-14.7	-5.9	-0.3	5.3	8.7	5.2	1.5	-2.9	-12.7	-14.4	-5.25833	2.91667	14.9833	-13.05	-13.05
	1990	-18.2	-15.3	-11.4	-6.3	1.5	6	6.8	4.2	1.7	-2.8		-12.9	-4.24545	2.9	14.9667	-12.9	-12.9
	1989	-15.9	-18	-9.7	-8	0.1	4.9	6.3	4.75	2.9	-5.15	-3.45	-11.95	-4.43333	2.3	14.3667	-11.6833	-11.6833
	1988	-16.5	-19.6	-12.7	-5.9	-2.8	3.8	5.8	5.3	4.1	-7.5	-6.9	-11	-5.325	1.45	13.5167	-11.1167	-11.1167
	1987	-14.2	-13.2	-14.3	-7.1	-1.6	2.2	7.9	6.5	0	-10.9	-16.2	-12.6	-6.125	0.683333	12.75	-12.9333	-12.9333
	1986	-12.6	-15.8	-12.9	-7.5	3.2	7.7	5.3	2.5	-6.6	-11.9	-15.3	-12.225	-6.34375	0.0333333	12.1	-14.1208	-14.1208
	1985	-16.5	-17.8	-16.8	-6.1	-2.6	6.8	5.1	0.9	-6.9	-12.9	-13	-11.85	-7.6375	-1.6	10.4667	-14.075	-14.075
	1984	-17.8	-20.4	-11.6	-9.8	-0.8	3.7	4.5	5.6	0.4	-6.1	-14.3	-23.7	-7.525	1.21667	13.2833	-13.8	-13.8
	1983	-13.2	-13.2	-9.8	-8.6	-2.8	3.2	6.3	6.1	-2.2	-3.6	-8.3	-18.55	-5.3875	1.16667	13.2333	-12.3583	-12.3583
	1982	-13.9	-15.1	-14.7	-3.6	1.3	6.6	6.3	5.45	-1.15	-4.6	-9.85	-13.4	-4.72083	2.31667	14.3833	-11.825	-11.825
	1981	-16.3	-17.1	-9.7	-4.6	1.35	5.2	6.45	4.8	-0.1	-7.9	-11.4	-11.8	-5.09167	1.63333	13.7	-13.1667	-13.1667
	1980	-17.3	-15.3	-15.8	-7.4	1.4	3.8	6.6	7	2.3	-5.2	-9.4	-11.9	-5.1	2.65	14.7167	-12.85	-12.85
	1979	-19.2	-12.3	-15.1	-9.2	-0.8	6.2	7.6	4.6	0.6	-3.9	-12.5	-12.3	-5.525	2.38333	14.45	-12.15	-12.15
	1978	-15	-16.6	-11.8	-4.7	-1.1	6.5	7.2	3	2.9	-5.4	-11.1	-13.1	-4.93333	2.18333	14.25	-13.0667	-13.0667
	1977	-19.9	-16.8	-12.6	-4.9	-1.7	7	6.5	5.1	3.1	-5.3	-8	-15.6	-5.25833	2.45	14.5167	-12.6333	-12.6333
	1976	-11.8	-17.2	-16	-7.2	0.4	6.1	4.6	4.3	-0.4	-8.3	-14.2	-17.8	-6.45833	1.11667	13.1833	-13.8	-13.8
	1975	-14.2	-14.7	-11.3	-10.6	-3.2	3.9	7.7	5.3	-0.3	-7.4	-13.4	-14.3	-6.04167	1	13.0667	-14.5333	-14.5333
	1974	-20.7	-19	-15.2	-4.6	1.9	4.9	9.9	6.9	-1.6	-6.5	-14.1	-16.6	-6.225	2.58333	14.65	-13.6333	-13.6333
	1973	-17.3	-17.8	-11	-5	-3	5	6.1	5.4	1.8	-5.6	-10.2	-16.4	-5.66667	1.61667	13.6833	-14.0333	-14.0333
	1972	-19	-21.4	-13.2	-4	-0.6	5.3	4.2	4.9	-1.7	-6.5	-10.6	-16.2	-6.56667	0.933333	13	-13.6333	-13.6333
	1971	-17.5	-18.1	-14	-5.4	-2.8	4.3	5.2	4.6	1.1	-3.6	-8.2	-12.5	-5.575	1.46667	13.5333	-12.55	-12.55
	1970	-15.4	-16.4	-16.1	-6.7	-2.5	3.4	6	5.5	0.3	-7	-14	-16.9	-6.65	0.95	13.0167	-16.6167	-16.6167
	1969	-24.9	-25.2	-13.2	-5.5	-2.6	4.9	8.1	3	-1.5	-7.6	-10.9	-13.2	-7.38333	0.716667	12.7833	-12.5667	-12.5667
	1968	-15.4	-17.3	-9.9	-8.7	1	5.1	6.8	5.4	-3.8	-6.6	-14.5	-19	-6.40833	1.31667	13.3833	-13.3833	-13.3833
	1967	-15.1	-16	-9.8	-5.9	2.9	3.8	5.9	2.6	-1.5	-5.2	-12.6	-9.9	-5.06667	1.41667	13.4833	-12.95	-12.95
	1966	-17.6	-16.5	-12.3	-8.8	-2.9	5.2	7	7.3	5	-6.1	-15.6	-20.2	-6.29167	2.58333	14.65	-13.6833	-13.6833
	1965	-15.4	-14	-10.1	-6.8	2	5.6	9	4.6	0.3	-5.7	-11.5	-15.1	-4.75833	2.63333	14.7	-14.1167	-14.1167
	1964	-15.9	-21.6	-13	-7.6	-1.3	5.6	7.7	5.7	1	-9.8	-9.8	-13.9	-6.075	1.48333	13.55	-10.9167	-10.9167
	1963	-10.4	-11.4	-7.9	-12.1	-1.7	4.3	6.9	5.4	1.55	-6.2	-10	-12.7	-4.52083	1.70833	13.775	-11.3	-11.3
	1962	-14.6	-13.5	-9.55	-7.45	-0.95	6.2	7.2	7.6	2.1	-6.4	-14.4	-13.5	-4.77083	2.625	14.6917	-12.3667	-12.3667
	1961	-16.7	-15.6	-11.2	-2.8	-0.2	2.2	6.2	4.6	0.9	-11.4	-10.6	-14.1	-5.725	0.383333	12.45	-12.8833	-12.8833
	1960	-16.8	-14.2	-15.2	-6.4	-4.6	3.3	4.5	4.5	-0.1	-7.2	-15	-15.7	-6.90833	0.0666667	12.1333	-13.35	-13.35
	1959	-14.9	-16.3	-12.1	-6.1	-2.2	4.9	6.6	5.2	4.4	-6.1	-16.8	-19	-6.03333	2.13333	14.2	-14.4333	-14.4333
	1958	-16.1	-13.6	-12.9	-8.2	-2	0.1	5.7	5.6	-0.1	-6.6	-13.2	-13.7	-6.25	0.45	12.5167	-14.4667	-14.4667
	1957	-19.4	-19.5	-11.3	-9.7	-3	6.5	5	3.4	2.6	-5.1	-12	-14.4	-6.40833	1.56667	13.6333	-13.5333	-13.5333
	1956	-18	-17.1	-13.7	-6	-1	1.6	7.7	5.4	0	-4.5	-8.3	-15.9	-5.81667	1.53333	13.6	-13.1333	-13.1333
	1955	-16	-16.1	-13.2	-9.3	0.8	6.9	7	7.7	-1.1	-5.3	-9.5	-16.2	-5.35833	2.66667	14.7333	-13.8167	-13.8167
	1954	-18.1	-17.7	-13.6	-7.8	-6.4	4.1	4.7	7.3	1.3	-5	-15	-20.2	-7.2	1	13.0667	-13.8167	-13.8167
	1953	-16.3	-14	-10.6	-6.8	0.8	6.3	8.7	4.5	5.3	-8.1	-15.9	-15.1	-5.1	2.91667	14.9833	-14.15	-14.15
	1952	-15	-17	-12.7	-9.2	0	4.1	6.7	6.9	1.6	-7.9	-19.3	-17.2	-6.58333	1.9	13.9667	-16.15	-16.15
	1951	-17	-24.5	-13.3	-5.6	2.9	5.9	8	3.1	2.9	-6.2	-13.3	-12	-5.75833	2.76667	14.8333	-13.1333	-13.1333
	1950	-15	-16.5	-11.3	-10.7	0.8	5.3	7.8	4.9	1.1	-6.9	-16.5	-17.4	-6.2	2.16667	14.2333	-13.6167	-13.6167
	1949	-15.6	-14.2	-14.2	-3.8	-1	5	5.7	6.4	-3.6	-4.2	-16.2	-19.8	-6.29167	1.38333	13.45	-14.0667	-14.0667
	1948	-14.7	-17.1	-10.2	-6.4	-1.7	3	8.5	4.9	-0.5	-4.8	-13.5	-18	-5.875	1.56667	13.6333	-13.65	-13.65
	1947	-20.3	-16.6	-9.1	-4.4	-1.9	4.3	5.9	4.7	0.6	-5.8	-10.9	-18.5	-6	1.3	13.3667	-13.25	-13.25
	1946	-17.6	-10.9	-16.7	-4.9	-2.2	2.7	7.1	3.3	-2.4	-3.2	-13.5	-19.9	-6.51667	0.883333	12.95	-14.7167	-14.7167
	1945	-17.8	-21	-14.1	-2	3.9	5.7	6.1	7.1	0.4	-2.5	-15	-13.5	-5.225	3.45	15.5167	-12.0833	-12.0833
	1944	-16.9	-12.5	-8.1	-6.5	-1	6.3	5.9	5.5	-0.8	-6.7	-15.7	-21.7	-6.01667	1.53333	13.6	-15	-15
	1943	-17	-15.9	-15.2	-4.5	-0.5	3.6	7.2	7.5	0.8	-7.8	-14.1	-14.4	-5.85833	1.8	13.8667	-13.45	-13.45
	1942	-13.5	-20.5	-10.7	-7.5	-3.3	5.5	5.7	5	1.6	-7	-9.1	-16.3	-5.84167	1.25	13.3167	-12.4333	-12.4333
	1941	-14.7	-18.1	-10.8	-5.6	-0.2	6.9	5.7	5.3	0.9	-4	-13.1	-13.7	-5.11667	2.43333	14.5	-12.35	-12.35
	1940	-18.5	-15	-9	-4.8	-1.6	5	8.2	5	-2.8	-6.8	-12.7	-12.7	-5.475	1.16667	13.2333	-12.7	-12.7

## Sheet: 4yr_anomaly_Altai
Four‑year mean temperature anomalies of the Altai region (Kara‑Tyurek and Ust‑Koksa average). Temperatures were converted to anomalies relative to 1961–1990 and averaged into 4‑year means (1 mm scan step = 4 years). Linear fits to 4‑year anomaly data: Tann:y = 48.915x – 4.3244 (r=0.82, SE=0.387); MJJASO: y = 46.787x – 4.1566 (r=0.75, SE=0.412); NDJFMA: y = 44.102x – 3.7684 (r=0.66, SE=0.445). Err…	Year AD	4‑year Tann anomaly	Br/Rb	Reconstructed (based Br/Rb)	Error +	Error –					Year AD	4‑year MJJASO anomaly	Br/Rb	Reconstructed (based Br/Rb)	Error +	Error –			Year AD	4‑year NDJFMA anomaly	Br/Rb	Reconstructed (based Br/Rb)	Error +	Error –
	2016	0.965335	0.111676	1.13824	1.52524	0.751242					2016	0.615	0.111676	1.0684	1.4804	0.656395			2016	0.992361	0.111676	1.15674	1.60174	0.711745
	2012	0.666116	0.11297	1.20153	1.58853	0.814527					2012	1.4525	0.11297	1.12893	1.54093	0.716927			2012	-0.143576	0.11297	1.2138	1.6588	0.768803
	2008	1.18197	0.113115	1.20861	1.59561	0.821607					2008	1.06944	0.113115	1.1357	1.5477	0.723699			2008	1.46007	0.113115	1.22019	1.66519	0.775186
	2004	1.05176	0.103743	0.750209	1.13721	0.363209					2004	1.00069	0.103743	0.697243	1.10924	0.285243			2004	1.24549	0.103743	0.806892	1.25189	0.361892
	2000	1.39551	0.0982437	0.481191	0.868191	0.094191					2000	1.47361	0.0982437	0.439928	0.851928	0.0279284			2000	0.764236	0.0982437	0.564344	1.00934	0.119344
	1996	0.322598	0.0964913	0.395474	0.782474	0.00847424					1996	0.0819444	0.0964913	0.357941	0.769941	-0.0540593			1996	1.2309	0.0964913	0.487061	0.932061	0.0420614
	1992	1.09947	0.098078	0.473083	0.860083	0.0860833					1992	0.575694	0.098078	0.432173	0.844173	0.0201734			1992	1.30382	0.098078	0.557034	1.00203	0.112034
	1988	-0.206308	0.0886161	0.0102558	0.397256	-0.376744					1988	-0.853472	0.0886161	-0.0105193	0.401481	-0.422519			1988	-0.0352431	0.0886161	0.139747	0.584747	-0.305253
	1985	-0.418808	0.0774294	-0.536942	-0.149942	-0.923942					1985	-0.503472	0.0774294	-0.533911	-0.121911	-0.945911			1985	-0.0513889	0.0774294	-0.353609	0.0913908	-0.798609
	1981	0.360098	0.0924295	0.196787	0.583787	-0.190213					1981	0.425694	0.0924295	0.167897	0.579897	-0.244103			1981	0.0392361	0.0924295	0.307924	0.752924	-0.137076
	1977	-0.23886	0.0889341	0.0258117	0.412812	-0.361188					1977	0.225694	0.0889341	0.00435996	0.41636	-0.40764			1977	-0.346181	0.0889341	0.153772	0.598772	-0.291228
	1973	-0.216985	0.0838389	-0.223419	0.163581	-0.610419					1973	-0.455556	0.0838389	-0.234028	0.177972	-0.646028			1973	-0.827431	0.0838389	-0.0709357	0.374064	-0.515936
	1969	-0.815944	0.0834948	-0.240251	0.146749	-0.627251					1969	-0.105556	0.0834948	-0.250128	0.161872	-0.662128			1969	-0.560764	0.0834948	-0.0861116	0.358888	-0.531112
	1965	0.622598	0.0897142	0.0639696	0.45097	-0.32303					1965	0.648611	0.0897142	0.0408578	0.452858	-0.371142			1965	0.557986	0.0897142	0.188175	0.633175	-0.256825
	1961	-0.74511	0.0720228	-0.801404	-0.414404	-1.1884					1961	-0.893056	0.0720228	-0.786868	-0.374868	-1.19887			1961	-0.950347	0.0720228	-0.59205	-0.14705	-1.03705
	1957	-0.725319	0.0826223	-0.282929	0.104071	-0.669929					1957	-0.0534722	0.0826223	-0.290949	0.121051	-0.702949			1957	-1.00243	0.0826223	-0.12459	0.32041	-0.56959
	1954	-0.671152	0.0748081	-0.665159	-0.278159	-1.05216					1954	0.463194	0.0748081	-0.656551	-0.244551	-1.06855			1954	-1.63368	0.0748081	-0.469211	-0.024211	-0.914211
	1950	-0.60709	0.0826358	-0.28227	0.10473	-0.66927					1950	-0.309722	0.0826358	-0.290319	0.121681	-0.702319			1950	-0.542014	0.0826358	-0.123997	0.321003	-0.568997
	1946	-0.563079	0.0906681	0.110628	0.497628	-0.276372					1946	0.165278	0.0906681	0.0854866	0.497487	-0.326513			1946	-1.45243	0.0906681	0.230243	0.675243	-0.214757
	1942	0.0472506	0.0777787	-0.519855	-0.132855	-0.906855					1942	-0.0666667	0.0777787	-0.517568	-0.105568	-0.929568			1942	0.626042	0.0777787	-0.338204	0.106796	-0.783204
