# Supplementary material
Source: Research Square preprint supplement (doi:10.21203/rs.3.rs-9540103/v1)
Supplement: Supplementary file 4 [file a0cca1beec1043222d4c6b81.xlsx]

## Sheet: Reconstructed_MAAT
Four‑year mean temperature anomalies based on Br/Rb reconstruction (10726 BP). Reconstruction equation: y=34.476x−2.9687. The reconstruction (blue line) represents 4‑year mean annual temperature anomalies (°C) relative to the 1961–1990 baseline. The orange line shows a 25‑year smoothing window.	Depth, cm	Br/Rb	Year, BP	4‑year anomaly	25‑year smoothed	Br/Rb
	0	0.12041	-70	1.18256	0.415187	0.12041
	0.1071	0.111676	-63.8634	0.881449	0.379093	0.111676
	0.2142	0.11297	-57.7242	0.926054	0.362106	0.11297
	0.3213	0.113115	-51.5823	0.931044	0.373764	0.113115
	0.4284	0.103743	-45.4377	0.607958	0.364986	0.103743
	0.5355	0.0982437	-39.2904	0.41835	0.323064	0.0982437
	0.6426	0.0964913	-33.1404	0.357936	0.299758	0.0964913
	0.7497	0.098078	-26.9877	0.412636	0.292629	0.098078
	0.8568	0.0886161	-20.8324	0.0864281	0.265018	0.0886161
	0.9639	0.0674294	-14.6744	-0.644004	0.239599	0.0674294
	1.071	0.0924295	-8.51368	0.217898	0.20343	0.0924295
	1.1781	0.0889341	-2.35029	0.0973922	0.20024	0.0889341
	1.2852	0.0838389	3.81577	-0.0782692	0.186414	0.0838389
	1.3923	0.0834948	9.98452	-0.0901327	0.099132	0.0834948
	1.4994	0.0897142	16.1559	0.124286	0.0543541	0.0897142
	1.6065	0.102023	22.3301	0.548639	-0.00859196	0.102023
	1.7136	0.0926223	28.5068	0.224548	-0.0901986	0.0926223
	1.8207	0.0748081	34.6863	-0.389614	-0.149067	0.0748081
	1.9278	0.0826358	40.8685	-0.119749	-0.193972	0.0826358
	2.0349	0.0906681	47.0533	0.157172	-0.251141	0.0906681
	2.142	0.0777787	53.2408	-0.287202	-0.318419	0.0777787
	2.2491	0.0775755	59.431	-0.294206	-0.36703	0.0775755
	2.3562	0.0689295	65.6239	-0.592286	-0.383532	0.0689295
	2.4633	0.0897894	71.8195	0.12688	-0.446118	0.0897894
	2.5704	0.0818911	78.0177	-0.145421	-0.492142	0.0818911
	2.6775	0.0571184	84.2186	-0.999485	-0.540344	0.0571184
	2.7846	0.0792058	90.4223	-0.237999	-0.587387	0.0792058
	2.8917	0.0673252	96.6285	-0.647597	-0.650446	0.0673252
	2.9919	0.0539383	102.437	-1.10912	-0.72846	0.0539383
	3.09795	0.0610554	108.588	-0.863753	-0.785041	0.0610554
	3.204	0.0656815	114.741	-0.704264	-0.834984	0.0656815
	3.31005	0.0550353	120.897	-1.0713	-0.902257	0.0550353
	3.4161	0.0492916	127.055	-1.26932	-0.988354	0.0492916
	3.52215	0.0533665	133.217	-1.12884	-1.04568	0.0533665
	3.6282	0.0554628	139.38	-1.05656	-1.10128	0.0554628
	3.73425	0.0470459	145.547	-1.34674	-1.15782	0.0470459
	3.8403	0.0555605	151.716	-1.0532	-1.23893	0.0555605
	3.94635	0.0488856	157.887	-1.28332	-1.30885	0.0488856
	4.0524	0.049382	164.061	-1.26621	-1.35927	0.049382
	4.15845	0.0439875	170.238	-1.45219	-1.44265	0.0439875
	4.2645	0.0454512	176.418	-1.40172	-1.51606	0.0454512
	4.37055	0.0515931	182.6	-1.18998	-1.57236	0.0515931
	4.4766	0.0385921	188.785	-1.6382	-1.6203	0.0385921
	4.58265	0.0338536	194.972	-1.80156	-1.68611	0.0338536
	4.6887	0.0282359	201.162	-1.99524	-1.74584	0.0282359
	4.79475	0.036212	207.355	-1.72025	-1.79988	0.036212
	4.9008	0.0372557	213.55	-1.68427	-1.86446	0.0372557
	5.00685	0.0279282	219.748	-2.00585	-1.92863	0.0279282
	5.085	0.0309725	224.317	-1.90089	-1.97726	0.0309725
	5.19	0.0311912	230.458	-1.89335	-2.03589	0.0311912
	5.295	0.0205595	236.602	-2.25989	-2.08341	0.0205595
	5.4	0.0187415	242.748	-2.32257	-2.13154	0.0187415
	5.505	0.0140887	248.897	-2.48298	-2.14464	0.0140887
	5.61	0.0131148	255.048	-2.51656	-2.17774	0.0131148
	5.715	0.0262922	261.202	-2.06225	-2.21466	0.0262922
	5.82	0.0179592	267.358	-2.34954	-2.22339	0.0179592
	5.925	0.0117262	273.517	-2.56443	-2.24503	0.0117262
	6.03	0.0101058	279.679	-2.62029	-2.25277	0.0101058
	6.135	0.00653154	285.843	-2.74352	-2.27105	0.00653154
	6.24	0.00892868	292.01	-2.66087	-2.3088	0.00892868
	6.345	0.011788	298.18	-2.5623	-2.31703	0.011788
	6.45	0.0130448	304.352	-2.51897	-2.30901	0.0130448
	6.555	0.0144219	310.526	-2.47149	-2.30178	0.0144219
	6.66	0.0144856	316.703	-2.46929	-2.28781	0.0144856
	6.765	0.034489	322.883	-1.77966	-2.28004	0.034489
	6.87	0.0214503	329.065	-2.22918	-2.27429	0.0214503
	6.975	0.0248205	335.25	-2.11299	-2.2626	0.0248205
	7.08	0.0322554	341.438	-1.85666	-2.25504	0.0322554
	7.185	0.0181614	347.628	-2.34257	-2.24821	0.0181614
	7.29	0.0226236	353.82	-2.18873	-2.21686	0.0226236
	7.395	0.0229588	360.015	-2.17717	-2.1762	0.0229588
	7.5	0.00988456	366.213	-2.62792	-2.14513	0.00988456
	7.605	0.0219543	372.413	-2.2118	-2.10649	0.0219543
	7.71	0.0367889	378.616	-1.70037	-2.07178	0.0367889
	7.815	0.0364379	384.822	-1.71247	-2.03637	0.0364379
	7.92	0.0306915	391.03	-1.91058	-2.00108	0.0306915
	8.025	0.0243724	397.241	-2.12844	-1.92895	0.0243724
	8.13	0.0182614	403.454	-2.33912	-1.92068	0.0182614
	8.235	0.0215919	409.67	-2.2243	-1.88944	0.0215919
	8.34	0.0317709	415.888	-1.87337	-1.8732	0.0317709
	8.445	0.0229152	422.109	-2.17868	-1.90291	0.0229152
	8.55	0.0344594	428.332	-1.78068	-1.91242	0.0344594
	8.655	0.03959	434.559	-1.6038	-1.90742	0.03959
	8.76	0.0290614	440.787	-1.96678	-1.92806	0.0290614
	8.865	0.0369455	447.018	-1.69497	-1.91742	0.0369455
	8.97	0.03696	453.252	-1.69447	-1.94412	0.03696
	9.075	0.03872	459.489	-1.63379	-1.98817	0.03872
	9.18	0.0400117	465.728	-1.58926	-2.01114	0.0400117
	9.285	0.0667913	471.969	-0.666004	-2.02241	0.0667913
	9.39	0.0404885	478.213	-1.57282	-2.03979	0.0404885
	9.495	0.0441015	484.46	-1.44825	-2.02932	0.0441015
	9.6	0.0365941	490.71	-1.70708	-2.04557	0.0365941
	9.705	0.0107099	496.961	-2.59946	-2.07326	0.0107099
	9.81	0.0112695	503.216	-2.58017	-2.09919	0.0112695
	9.915	0.0262465	509.473	-2.06383	-2.11758	0.0262465
	10.02	0.00799031	515.733	-2.69323	-2.16793	0.00799031
	10.125	0.0176	521.995	-2.36192	-2.18206	0.0176
	10.23	0.00259358	528.259	-2.87928	-2.20861	0.00259358
	10.335	0.004847	534.527	-2.80159	-2.23873	0.004847
	10.44	0.0197813	540.797	-2.28672	-2.27273	0.0197813
	10.545	0.0225182	547.069	-2.19236	-2.29569	0.0225182
	10.65	0.0117745	553.344	-2.56276	-2.36665	0.0117745
	10.755	0.0258493	559.622	-2.07752	-2.40897	0.0258493
	10.86	0.00981221	565.902	-2.63041	-2.44992	0.00981221
	10.965	0.0116893	572.185	-2.5657	-2.48008	0.0116893
	11.07	0.00411576	578.47	-2.82681	-2.48029	0.00411576
	11.175	0.02112	584.758	-2.24057	-2.48576	0.02112
	11.28	0.00308231	591.049	-2.86243	-2.50253	0.00308231
	11.385	0.0188124	597.342	-2.32013	-2.48928	0.0188124
	11.49	0.0176965	603.638	-2.35859	-2.47332	0.0176965
	11.595	0.0151166	609.936	-2.44754	-2.41823	0.0151166
	11.7	0.0140633	616.237	-2.48385	-2.38842	0.0140633
	11.805	0.0233628	622.54	-2.16324	-2.35004	0.0233628
	11.91	0.0153377	628.846	-2.43992	-2.33802	0.0153377
	12.015	0.00979592	635.155	-2.63098	-2.29613	0.00979592
	12.12	0.0144136	641.466	-2.47178	-2.26298	0.0144136
	12.225	0.0147217	647.78	-2.46116	-2.21172	0.0147217
	12.33	0.01056	654.096	-2.60463	-2.17411	0.01056
	12.435	0.0073029	660.415	-2.71693	-2.1254	0.0073029
	12.54	0.01408	666.737	-2.48328	-2.09214	0.01408
	12.645	0.0176	673.061	-2.36192	-2.05761	0.0176
	12.75	0.0291742	679.387	-1.96289	-2.0105	0.0291742
	12.855	0.0425445	685.717	-1.50193	-1.95696	0.0425445
	12.96	0.0264582	692.048	-2.05653	-1.92088	0.0264582
	13.065	0.0476114	698.383	-1.32725	-1.88833	0.0476114
	13.17	0.0312391	704.72	-1.8917	-1.84739	0.0312391
	13.275	0.0421485	711.059	-1.51559	-1.7836	0.0421485
	13.38	0.0498888	717.401	-1.24873	-1.71384	0.0498888
	13.485	0.0469803	723.746	-1.34901	-1.65588	0.0469803
	13.59	0.0389648	730.093	-1.62535	-1.60909	0.0389648
	13.695	0.0394366	736.443	-1.60908	-1.55908	0.0394366
	13.8	0.045235	742.795	-1.40918	-1.47232	0.045235
	13.905	0.0281279	749.15	-1.99896	-1.41977	0.0281279
	14.01	0.0529685	755.508	-1.14256	-1.38736	0.0529685
	14.115	0.0565247	761.868	-1.01996	-1.36338	0.0565247
	14.22	0.0412769	768.231	-1.54564	-1.32704	0.0412769
	14.325	0.0376675	774.596	-1.67008	-1.28963	0.0376675
	14.43	0.0530507	780.964	-1.13972	-1.28467	0.0530507
	14.535	0.0615918	787.334	-0.84526	-1.25448	0.0615918
	14.64	0.0603868	793.708	-0.886806	-1.22414	0.0603868
	14.745	0.0564384	800.083	-1.02293	-1.22276	0.0564384
	14.85	0.0486553	806.461	-1.29126	-1.25418	0.0486553
	14.955	0.0468205	812.842	-1.35452	-1.23566	0.0468205
	15.06	0.0702158	819.225	-0.547939	-1.22565	0.0702158
	15.165	0.0521893	825.611	-1.16942	-1.21243	0.0521893
	15.27	0.0411004	832	-1.55172	-1.18494	0.0411004
	15.375	0.0465608	838.391	-1.36347	-1.175	0.0465608
	15.48	0.0688968	844.785	-0.593414	-1.17724	0.0688968
	15.585	0.0535859	851.181	-1.12127	-1.15438	0.0535859
	15.69	0.0512081	857.58	-1.20325	-1.14349	0.0512081
	15.795	0.0531365	863.981	-1.13676	-1.14723	0.0531365
	15.9	0.0641458	870.385	-0.75721	-1.15246	0.0641458
	16.005	0.0508873	876.792	-1.21431	-1.16194	0.0508873
	16.11	0.0241964	883.201	-2.1345	-1.17985	0.0241964
	16.215	0.0523983	889.612	-1.16222	-1.15761	0.0523983
	16.32	0.046696	896.027	-1.35881	-1.14367	0.046696
	16.425	0.0548186	902.443	-1.07878	-1.15657	0.0548186
	16.53	0.0480644	908.863	-1.31163	-1.15401	0.0480644
	16.635	0.0601756	915.285	-0.894086	-1.13497	0.0601756
	16.74	0.0548996	921.71	-1.07598	-1.11464	0.0548996
	16.845	0.0578536	928.137	-0.97414	-1.12748	0.0578536
	16.95	0.0455667	934.566	-1.39774	-1.13524	0.0455667
	17.055	0.0503364	940.999	-1.2333	-1.13234	0.0503364
	17.16	0.0578024	947.434	-0.975905	-1.1327	0.0578024
	17.265	0.0535097	953.871	-1.1239	-1.16942	0.0535097
	17.37	0.0434494	960.311	-1.47074	-1.18473	0.0434494
	17.475	0.064785	966.754	-0.735171	-1.1709	0.064785
	17.58	0.0569303	973.199	-1.00597	-1.16626	0.0569303
	17.685	0.0608574	979.647	-0.87058	-1.17519	0.0608574
	17.79	0.0540479	986.097	-1.10535	-1.21085	0.0540479
	17.895	0.054908	992.55	-1.07569	-1.23783	0.054908
	18	0.0612982	999.006	-0.855383	-1.26147	0.0612982
	18.105	0.0595878	1005.46	-0.914352	-1.27838	0.0595878
	18.21	0.0479598	1011.92	-1.31524	-1.30477	0.0479598
	18.315	0.0533139	1018.39	-1.13065	-1.30214	0.0533139
	18.42	0.0528755	1024.85	-1.14576	-1.33916	0.0528755
	18.525	0.0375122	1031.32	-1.67543	-1.36647	0.0375122
	18.63	0.0397881	1037.79	-1.59697	-1.36493	0.0397881
	18.735	0.0342279	1044.27	-1.78866	-1.37221	0.0342279
	18.84	0.0557611	1050.74	-1.04628	-1.4166	0.0557611
	18.945	0.0402216	1057.22	-1.58202	-1.44521	0.0402216
	19.05	0.0289557	1063.7	-1.97042	-1.49739	0.0289557
	19.155	0.0285045	1070.19	-1.98598	-1.54249	0.0285045
	19.26	0.0430333	1076.67	-1.48508	-1.57269	0.0430333
	19.365	0.0426339	1083.16	-1.49885	-1.57561	0.0426339
	19.47	0.0387225	1089.65	-1.6337	-1.6033	0.0387225
	19.575	0.0474689	1096.15	-1.33216	-1.60493	0.0474689
	19.68	0.0234908	1102.64	-2.15883	-1.59807	0.0234908
	19.785	0.0380035	1109.14	-1.65849	-1.5984	0.0380035
	19.89	0.0546272	1115.65	-1.08537	-1.56733	0.0546272
	19.995	0.0381672	1122.15	-1.65285	-1.53527	0.0381672
	20.1	0.0325926	1128.66	-1.84504	-1.47829	0.0325926
	20.205	0.0361892	1135.17	-1.72104	-1.45777	0.0361892
	20.31	0.0230145	1141.68	-2.17525	-1.46307	0.0230145
	20.415	0.0213438	1148.19	-2.23285	-1.43183	0.0213438
	20.52	0.033015	1154.71	-1.83047	-1.3792	0.033015
	20.625	0.0591796	1161.23	-0.928426	-1.36627	0.0591796
	20.73	0.0395089	1167.75	-1.60659	-1.34826	0.0395089
	20.835	0.0467753	1174.28	-1.35607	-1.32885	0.0467753
	20.94	0.0582906	1180.81	-0.959073	-1.33425	0.0582906
	21.045	0.0526331	1187.34	-1.15412	-1.31427	0.0526331
	21.15	0.0600414	1193.87	-0.898714	-1.30199	0.0600414
	21.255	0.0630372	1200.41	-0.795428	-1.31843	0.0630372
	21.36	0.0755445	1206.94	-0.364227	-1.25553	0.0755445
	21.465	0.0706436	1213.48	-0.533191	-1.22706	0.0706436
	21.57	0.0363809	1220.03	-1.71443	-1.20228	0.0363809
	21.675	0.051604	1226.57	-1.1896	-1.17324	0.051604
	21.78	0.0666711	1233.12	-0.670146	-1.12868	0.0666711
	21.885	0.0524069	1239.67	-1.16192	-1.10418	0.0524069
	21.99	0.0556962	1246.23	-1.04852	-1.10279	0.0556962
	22.095	0.0528	1252.78	-1.14837	-1.10083	0.0528
	22.2	0.043549	1259.34	-1.46731	-1.08903	0.043549
	22.305	0.0379814	1265.9	-1.65925	-1.08488	0.0379814
	22.41	0.046909	1272.46	-1.35147	-1.11506	0.046909
	22.515	0.0427036	1279.03	-1.49645	-1.13901	0.0427036
	22.62	0.0837802	1285.6	-0.0802942	-1.12297	0.0837802
	22.725	0.0532384	1292.17	-1.13325	-1.15863	0.0532384
	22.83	0.0541538	1298.75	-1.10169	-1.16548	0.0541538
	22.935	0.0440755	1305.32	-1.44915	-1.14914	0.0440755
	23.04	0.0536549	1311.9	-1.11889	-1.13561	0.0536549
	23.145	0.0507807	1318.48	-1.21798	-1.14745	0.0507807
	23.25	0.0601859	1325.07	-0.89373	-1.14064	0.0601859
	23.355	0.0409302	1331.65	-1.55759	-1.1516	0.0409302
	23.46	0.0553325	1338.24	-1.06106	-1.14308	0.0553325
	23.565	0.0612998	1344.84	-0.855327	-1.09011	0.0612998
	23.67	0.0307503	1351.43	-1.90855	-1.04273	0.0307503
	23.775	0.0426741	1358.03	-1.49747	-1.00466	0.0426741
	23.88	0.0746667	1364.63	-0.394492	-0.982902	0.0746667
	23.985	0.0496926	1371.23	-1.2555	-1.01792	0.0496926
	24.09	0.0656716	1377.84	-0.704604	-1.03007	0.0656716
	24.195	0.0482275	1384.44	-1.30601	-1.01721	0.0482275
	24.3	0.0614177	1391.05	-0.851265	-1.02466	0.0614177
	24.405	0.0580858	1397.67	-0.966134	-1.02004	0.0580858
	24.51	0.0573449	1404.28	-0.991678	-1.00512	0.0573449
	24.615	0.0477496	1410.9	-1.32249	-0.98174	0.0477496
	24.72	0.0589804	1417.52	-0.935292	-0.883551	0.0589804
	24.825	0.0819579	1424.14	-0.143121	-0.837765	0.0819579
	24.93	0.0723376	1430.77	-0.474788	-0.81231	0.0723376
	25.035	0.0745174	1437.4	-0.399638	-0.731495	0.0745174
	25.14	0.05848	1444.03	-0.952543	-0.685008	0.05848
	25.245	0.0583858	1450.66	-0.955792	-0.675956	0.0583858
	25.35	0.044426	1457.3	-1.43707	-0.646384	0.044426
	25.455	0.0634795	1463.94	-0.780181	-0.635075	0.0634795
	25.56	0.038675	1470.58	-1.63534	-0.636448	0.038675
	25.665	0.057004	1477.22	-1.00343	-0.628177	0.057004
	25.77	0.0616	1483.87	-0.844978	-0.626108	0.0616
	25.875	0.0771418	1490.52	-0.309159	-0.600071	0.0771418
	25.98	0.112131	1497.17	0.897133	-0.570772	0.112131
	26.085	0.0885337	1503.82	0.0835883	-0.535675	0.0885337
	26.19	0.0797583	1510.48	-0.218953	-0.549598	0.0797583
	26.295	0.0893529	1517.14	0.11183	-0.552271	0.0893529
	26.4	0.0763834	1523.8	-0.335307	-0.563227	0.0763834
	26.505	0.0812308	1530.46	-0.168188	-0.558302	0.0812308
	26.61	0.0711368	1537.13	-0.516189	-0.53585	0.0711368
	26.715	0.073872	1543.8	-0.42189	-0.512167	0.073872
	26.82	0.0472316	1550.47	-1.34034	-0.503832	0.0472316
	26.925	0.0674154	1557.15	-0.644487	-0.483564	0.0674154
	27.03	0.0595866	1563.82	-0.914392	-0.483577	0.0595866
	27.135	0.0762254	1570.5	-0.340755	-0.476623	0.0762254
	27.24	0.0689954	1577.19	-0.590013	-0.486301	0.0689954
	27.345	0.0844303	1583.87	-0.0578798	-0.551937	0.0844303
	27.45	0.0718616	1590.56	-0.4912	-0.600178	0.0718616
	27.555	0.0704	1597.25	-0.54159	-0.635166	0.0704
	27.66	0.0665721	1603.94	-0.67356	-0.675336	0.0665721
	27.765	0.0620513	1610.64	-0.82942	-0.705938	0.0620513
	27.87	0.0746667	1617.33	-0.394492	-0.731973	0.0746667
	27.975	0.0616	1624.03	-0.844978	-0.771709	0.0616
	28.08	0.0695231	1630.74	-0.571821	-0.8248	0.0695231
	28.185	0.0533728	1637.44	-1.12862	-0.837056	0.0533728
	28.29	0.056994	1644.15	-1.00377	-0.865253	0.056994
	28.395	0.0666426	1650.86	-0.671129	-0.862749	0.0666426
	28.5	0.0701245	1657.57	-0.551087	-0.912705	0.0701245
	28.605	0.0645354	1664.29	-0.743777	-0.937312	0.0645354
	28.71	0.0535521	1671.01	-1.12244	-0.987925	0.0535521
	28.815	0.0543874	1677.73	-1.09364	-1.0155	0.0543874
	28.92	0.0602235	1684.45	-0.892436	-1.02244	0.0602235
	29.025	0.0541926	1691.18	-1.10036	-1.01346	0.0541926
	29.13	0.0623521	1697.91	-0.81905	-1.02313	0.0623521
	29.235	0.0423222	1704.64	-1.5096	-1.00232	0.0423222
	29.34	0.0353738	1711.37	-1.74915	-0.985468	0.0353738
	29.445	0.0383442	1718.11	-1.64674	-0.974392	0.0383442
	29.55	0.0469681	1724.85	-1.34943	-0.963076	0.0469681
	29.655	0.0614029	1731.59	-0.851775	-0.944405	0.0614029
	29.76	0.04	1738.33	-1.58966	-0.952549	0.04
	29.865	0.0511518	1745.08	-1.20519	-0.975013	0.0511518
	29.97	0.0477288	1751.83	-1.3232	-0.995469	0.0477288
	30.075	0.0518625	1758.58	-1.18069	-0.994116	0.0518625
	30.18	0.0653732	1765.34	-0.714892	-0.972152	0.0653732
	30.285	0.0730796	1772.09	-0.449208	-0.97216	0.0730796
	30.39	0.0550414	1778.85	-1.07109	-0.93551	0.0550414
	30.495	0.0897546	1785.62	0.12568	-0.914006	0.0897546
	30.6	0.073822	1792.38	-0.423612	-0.870322	0.073822
	30.705	0.0775546	1799.15	-0.294928	-0.819477	0.0775546
	30.81	0.0615785	1805.92	-0.845719	-0.747752	0.0615785
	30.915	0.0705331	1812.69	-0.537001	-0.707332	0.0705331
	31.02	0.0607367	1819.47	-0.874741	-0.685207	0.0607367
	31.125	0.0538353	1826.24	-1.11267	-0.652899	0.0538353
	31.23	0.0497021	1833.02	-1.25517	-0.603071	0.0497021
	31.335	0.0545328	1839.81	-1.08863	-0.55277	0.0545328
	31.44	0.0703148	1846.59	-0.544527	-0.497256	0.0703148
	31.545	0.0602176	1853.38	-0.892638	-0.467893	0.0602176
	31.65	0.0807687	1860.17	-0.18412	-0.442517	0.0807687
	31.755	0.0779457	1866.96	-0.281444	-0.384461	0.0779457
	31.86	0.0739992	1873.76	-0.417502	-0.384456	0.0739992
	31.965	0.0722434	1880.56	-0.478035	-0.369609	0.0722434
	32.07	0.0903556	1887.36	0.146399	-0.362016	0.0903556
	32.175	0.076278	1894.16	-0.338941	-0.358651	0.076278
	32.28	0.0774467	1900.97	-0.298647	-0.370828	0.0774467
	32.385	0.0634284	1907.78	-0.781942	-0.358669	0.0634284
	32.49	0.0872841	1914.59	0.0405071	-0.326052	0.0872841
	32.595	0.084204	1921.4	-0.0656839	-0.303867	0.084204
	32.7	0.0921182	1928.22	0.207168	-0.268747	0.0921182
	32.805	0.0866652	1935.04	0.0191692	-0.234844	0.0866652
	32.91	0.091481	1941.86	0.185199	-0.207952	0.091481
	33.015	0.09714	1948.68	0.380299	-0.200923	0.09714
	33.12	0.0897588	1955.51	0.125823	-0.211162	0.0897588
	33.225	0.0845877	1962.34	-0.0524559	-0.197633	0.0845877
	33.33	0.0830606	1969.17	-0.105103	-0.197384	0.0830606
	33.435	0.0640185	1976.01	-0.761599	-0.207601	0.0640185
	33.54	0.0617036	1982.84	-0.841405	-0.205362	0.0617036
	33.645	0.0695533	1989.68	-0.570782	-0.200681	0.0695533
	33.75	0.0774874	1996.53	-0.297245	-0.188657	0.0774874
	33.855	0.0657895	2003.37	-0.700542	-0.223875	0.0657895
	33.96	0.08	2010.22	-0.21062	-0.257474	0.08
	34.065	0.0948993	2017.07	0.303048	-0.302496	0.0948993
	34.17	0.0797176	2023.92	-0.220354	-0.324406	0.0797176
	34.275	0.0858661	2030.77	-0.00838203	-0.335974	0.0858661
	34.38	0.0705209	2037.63	-0.537422	-0.360204	0.0705209
	34.485	0.0838095	2044.49	-0.0792829	-0.366359	0.0838095
	34.59	0.0724239	2051.36	-0.471814	-0.378838	0.0724239
	34.695	0.0829469	2058.22	-0.109022	-0.381496	0.0829469
	34.8	0.0779016	2065.09	-0.282963	-0.372444	0.0779016
	34.905	0.0808412	2071.96	-0.18162	-0.344138	0.0808412
	35.01	0.0721478	2078.83	-0.481332	-0.319191	0.0721478
	35.115	0.0617457	2085.71	-0.839955	-0.296948	0.0617457
	35.22	0.05984	2092.59	-0.905656	-0.297127	0.05984
	35.325	0.0594708	2099.47	-0.918384	-0.301769	0.0594708
	35.43	0.0707775	2106.35	-0.528576	-0.295108	0.0707775
	35.535	0.0830924	2113.24	-0.104008	-0.307735	0.0830924
	35.64	0.07957	2120.12	-0.225444	-0.343848	0.07957
	35.745	0.0852955	2127.02	-0.0280521	-0.334461	0.0852955
	35.85	0.0755387	2133.91	-0.364428	-0.310025	0.0755387
	35.955	0.0811329	2140.81	-0.171563	-0.315238	0.0811329
	36.06	0.0705828	2147.7	-0.535287	-0.339705	0.0705828
	36.165	0.0822291	2154.61	-0.133769	-0.29999	0.0822291
	36.27	0.0876433	2161.51	0.0528908	-0.265176	0.0876433
	36.375	0.093617	2168.42	0.25884	-0.214951	0.093617
	36.48	0.0656597	2175.33	-0.705017	-0.206275	0.0656597
	36.585	0.0766335	2182.24	-0.326682	-0.172952	0.0766335
	36.69	0.0997299	2189.15	0.469588	-0.0977002	0.0997299
	36.795	0.0705613	2196.07	-0.536029	-0.0524926	0.0705613
	36.9	0.0596788	2202.99	-0.911215	-0.0403344	0.0596788
	37.005	0.0773277	2209.91	-0.30275	-0.0127879	0.0773277
	37.11	0.101529	2216.84	0.531618	-0.0061109	0.101529
	37.215	0.0686435	2223.76	-0.602146	0.0160591	0.0686435
	37.32	0.0652048	2230.69	-0.720699	0.031509	0.0652048
	37.425	0.106701	2237.62	0.709913	0.0518008	0.106701
	37.53	0.106086	2244.56	0.688736	0.0674978	0.106086
	37.635	0.108568	2251.5	0.774297	0.0417327	0.108568
	37.74	0.0680372	2258.44	-0.623051	0.0158657	0.0680372
	37.845	0.084004	2265.38	-0.0725789	0.0169214	0.084004
	37.95	0.114039	2272.33	0.962904	0.0183549	0.114039
	38.055	0.103559	2279.27	0.601615	0.0137469	0.103559
	38.16	0.0919088	2286.22	0.199947	0.0391321	0.0919088
	38.265	0.0995452	2293.18	0.46322	0.0646072	0.0995452
	38.37	0.0901373	2300.13	0.138873	0.0855682	0.0901373
	38.475	0.0916151	2307.09	0.189822	0.0580395	0.0916151
	38.58	0.0923362	2314.05	0.214684	0.0737347	0.0923362
	38.685	0.0852973	2321.01	-0.0279914	0.1123	0.0852973
	38.79	0.0936117	2327.98	0.258656	0.10203	0.0936117
	38.895	0.06896	2334.95	-0.591237	0.0793352	0.06896
	39	0.0748597	2341.92	-0.387836	0.0570087	0.0748597
	39.105	0.0664253	2348.89	-0.678622	0.0770454	0.0664253
	39.21	0.077673	2355.87	-0.290845	0.125854	0.077673
	39.315	0.0963884	2362.85	0.354386	0.115292	0.0963884
	39.42	0.0889692	2369.83	0.0986028	0.0935318	0.0889692
	39.525	0.0781518	2376.81	-0.274338	0.0856447	0.0781518
	39.63	0.0925274	2383.8	0.221275	0.0568773	0.0925274
	39.735	0.0815669	2390.79	-0.1566	0.0870462	0.0815669
	39.84	0.0800247	2397.78	-0.209767	0.094466	0.0800247
	39.945	0.0931701	2404.78	0.243434	0.0650523	0.0931701
	40.05	0.0992534	2411.77	0.453159	0.0339876	0.0992534
	40.155	0.0896296	2418.77	0.121371	0.0208073	0.0896296
	40.26	0.0923783	2425.77	0.216136	0.0273454	0.0923783
	40.365	0.0825666	2432.78	-0.122134	0.0489782	0.0825666
	40.47	0.119397	2439.79	1.14763	0.0495775	0.119397
	40.575	0.10638	2446.79	0.698848	0.0106111	0.10638
	40.68	0.0877805	2453.81	0.0576222	-0.0328644	0.0877805
	40.785	0.0861895	2460.82	0.00276956	-0.089544	0.0861895
	40.89	0.0786847	2467.84	-0.255965	-0.114679	0.0786847
	40.995	0.112014	2474.86	0.893093	-0.151831	0.112014
	41.1	0.0969956	2481.88	0.375319	-0.168598	0.0969956
	41.205	0.0710071	2488.91	-0.52066	-0.186079	0.0710071
	41.31	0.0627709	2495.94	-0.80461	-0.158506	0.0627709
	41.415	0.0840541	2502.97	-0.07085	-0.15825	0.0840541
	41.52	0.073701	2510	-0.427785	-0.168981	0.073701
	41.625	0.0905466	2517.03	0.152985	-0.159995	0.0905466
	41.73	0.0668598	2524.07	-0.663642	-0.16745	0.0668598
	41.835	0.0494168	2531.11	-1.265	-0.197796	0.0494168
	41.94	0.0648625	2538.16	-0.732501	-0.183859	0.0648625
	42.045	0.0478684	2545.2	-1.31839	-0.178493	0.0478684
	42.15	0.0599256	2552.25	-0.902705	-0.15553	0.0599256
	42.255	0.0655867	2559.3	-0.707533	-0.163465	0.0655867
	42.36	0.0694085	2566.35	-0.575774	-0.228427	0.0694085
	42.465	0.0673483	2573.41	-0.646801	-0.246058	0.0673483
	42.57	0.113165	2580.47	0.932777	-0.244009	0.113165
	42.675	0.0994385	2587.53	0.459541	-0.223261	0.0994385
	42.78	0.0818483	2594.59	-0.146897	-0.195233	0.0818483
	42.885	0.0988947	2601.66	0.440794	-0.175185	0.0988947
	42.99	0.0771608	2608.73	-0.308506	-0.172714	0.0771608
	43.095	0.0973913	2615.8	0.388963	-0.119594	0.0973913
	43.2	0.116486	2622.88	1.04728	0.00130669	0.116486
	43.305	0.0916719	2629.95	0.191782	0.0755529	0.0916719
	43.41	0.102841	2637.03	0.576833	0.162621	0.102841
	43.515	0.0729311	2644.11	-0.454326	0.23641	0.0729311
	43.62	0.064907	2651.2	-0.730965	0.267319	0.064907
	43.725	0.0842105	2658.28	-0.0654579	0.287216	0.0842105
	43.83	0.072493	2665.37	-0.46943	0.305551	0.072493
	43.935	0.077816	2672.47	-0.285915	0.264521	0.077816
	44.04	0.104379	2679.56	0.629855	0.24016	0.104379
	44.145	0.0882385	2686.66	0.0734099	0.240077	0.0882385
	44.25	0.0923388	2693.76	0.214773	0.205491	0.0923388
	44.355	0.105379	2700.86	0.664357	0.207207	0.105379
	44.46	0.137087	2707.97	1.7575	0.169089	0.137087
	44.565	0.118702	2715.07	1.12365	0.109422	0.118702
	44.67	0.111005	2722.18	0.858309	0.0632196	0.111005
	44.775	0.113434	2729.3	0.942034	-0.0100307	0.113434
	44.88	0.088	2736.41	0.065188	-0.00252219	0.088
	44.985	0.0838363	2743.53	-0.0783591	0.0284269	0.0838363
	45.09	0.080644	2750.65	-0.188419	0.0195677	0.080644
	45.195	0.0834123	2757.77	-0.0929768	0.0436386	0.0834123
	45.3	0.0817735	2764.9	-0.149478	0.0595047	0.0817735
	45.405	0.0817882	2772.03	-0.148969	0.0150457	0.0817882
	45.51	0.0738146	2779.16	-0.42387	0.00477138	0.0738146
	45.615	0.0784056	2786.29	-0.265588	-0.00359128	0.0784056
	45.72	0.0697497	2793.43	-0.564009	-0.0110623	0.0697497
	45.825	0.0732195	2800.57	-0.444385	-0.0942578	0.0732195
	45.93	0.0581686	2807.71	-0.96328	-0.129355	0.0581686
	46.035	0.0497237	2814.85	-1.25443	-0.157907	0.0497237
	46.14	0.0783759	2822	-0.266612	-0.176922	0.0783759
	46.245	0.0873495	2829.15	0.0427622	-0.160717	0.0873495
	46.35	0.0777863	2836.3	-0.286939	-0.137898	0.0777863
	46.455	0.0899479	2843.45	0.132344	-0.105805	0.0899479
	46.56	0.0893212	2850.61	0.110738	-0.0765788	0.0893212
	46.665	0.0721395	2857.77	-0.481619	-0.0625371	0.0721395
	46.77	0.0807881	2864.93	-0.183449	-0.0407581	0.0807881
	46.875	0.0862747	2872.09	0.00570643	-0.0369304	0.0862747
	46.98	0.0999618	2879.26	0.477582	-0.0198882	0.0999618
	47.085	0.0767582	2886.43	-0.322384	0.0231912	0.0767582
	47.19	0.0932512	2893.6	0.246228	0.0487542	0.0932512
	47.295	0.0903008	2900.78	0.144511	0.0883284	0.0903008
	47.4	0.0996448	2907.96	0.466653	0.136821	0.0996448
	47.505	0.0997512	2915.14	0.470323	0.155431	0.0997512
	47.61	0.100383	2922.32	0.492115	0.180512	0.100383
	47.715	0.103916	2929.5	0.613902	0.204641	0.103916
	47.82	0.104605	2936.69	0.637675	0.206586	0.104605
	47.925	0.0919556	2943.88	0.201562	0.222917	0.0919556
	48.03	0.0975812	2951.07	0.395508	0.26597	0.0975812
	48.135	0.0765902	2958.27	-0.328178	0.292337	0.0765902
	48.24	0.0907636	2965.47	0.160467	0.348824	0.0907636
	48.345	0.100988	2972.67	0.512976	0.374127	0.100988
	48.45	0.0917563	2979.87	0.194689	0.413164	0.0917563
	48.555	0.0868656	2987.08	0.0260771	0.416909	0.0868656
	48.66	0.0848875	2994.28	-0.0421199	0.440962	0.0848875
	48.765	0.0918713	3001.49	0.198655	0.461436	0.0918713
	48.87	0.105537	3008.71	0.669787	0.470211	0.105537
	48.975	0.0952831	3015.92	0.316281	0.468888	0.0952831
	49.08	0.0913579	3023.14	0.180953	0.456511	0.0913579
	49.185	0.101163	3030.36	0.519011	0.454399	0.101163
	49.29	0.10336	3037.59	0.594725	0.480135	0.10336
	49.395	0.0999076	3044.81	0.475714	0.491512	0.0999076
	49.5	0.127236	3052.04	1.4179	0.572404	0.127236
	49.605	0.118309	3059.27	1.11014	0.564011	0.118309
	49.71	0.105066	3066.51	0.653554	0.574127	0.105066
	49.815	0.0959664	3073.74	0.339839	0.561449	0.0959664
	49.92	0.107743	3080.98	0.745834	0.608496	0.107743
	50.025	0.114491	3088.22	0.978504	0.658212	0.114491
	50.13	0.106115	3095.47	0.689716	0.687493	0.106115
	50.235	0.0994239	3102.72	0.459037	0.696964	0.0994239
	50.34	0.0949405	3109.97	0.304468	0.740052	0.0949405
	50.445	0.103074	3117.22	0.584872	0.781366	0.103074
	50.55	0.110618	3124.47	0.844965	0.802389	0.110618
	50.655	0.105832	3131.73	0.679947	0.841455	0.105832
	50.76	0.135248	3138.99	1.6941	0.902663	0.135248
	50.865	0.0846776	3146.25	-0.0493557	0.889123	0.0846776
	50.97	0.108325	3153.52	0.765896	0.888705	0.108325
	51.075	0.0825623	3160.78	-0.122283	0.919278	0.0825623
	51.18	0.120982	3168.05	1.20228	0.929757	0.120982
	51.285	0.120938	3175.33	1.20077	0.920155	0.120938
	51.39	0.113104	3182.6	0.930687	0.893553	0.113104
	51.495	0.112404	3189.88	0.906553	0.913334	0.112404
	51.6	0.126528	3197.16	1.39348	0.962711	0.126528
	51.705	0.121316	3204.44	1.2138	1.0453	0.121316
	51.81	0.116408	3211.73	1.0446	1.09155	0.116408
	51.915	0.131688	3219.02	1.57137	1.05804	0.131688
	52.02	0.144292	3226.31	2.00591	1.07109	0.144292
	52.125	0.117418	3233.6	1.07939	1.04878	0.117418
	52.23	0.118006	3240.9	1.09969	1.11758	0.118006
	52.335	0.127236	3248.19	1.41789	1.20453	0.127236
	52.44	0.103565	3255.49	0.601815	1.25803	0.103565
	52.545	0.10078	3262.8	0.505777	1.2929	0.10078
	52.65	0.0952011	3270.1	0.313453	1.2949	0.0952011
	52.755	0.120459	3277.41	1.18423	1.3085	0.120459
	52.86	0.135229	3284.72	1.69347	1.29051	0.135229
	52.965	0.154829	3292.04	2.3692	1.34455	0.154829
	53.07	0.136615	3299.36	1.74124	1.30065	0.136615
	53.175	0.0863165	3306.67	0.0071484	1.29812	0.0863165
	53.28	0.115292	3314	1.00612	1.27172	0.115292
	53.385	0.119073	3321.32	1.13645	1.22954	0.119073
	53.49	0.134565	3328.65	1.67055	1.23576	0.134565
	53.595	0.171379	3335.98	2.93975	1.24021	0.171379
	53.7	0.121357	3343.31	1.2152	1.23505	0.121357
	53.805	0.146268	3350.64	2.07403	1.25124	0.146268
	53.91	0.122389	3357.98	1.25077	1.30829	0.122389
	54.015	0.122966	3365.32	1.27069	1.3231	0.122966
	54.12	0.0993604	3372.66	0.456851	1.29473	0.0993604
	54.225	0.165712	3380.01	2.74439	1.2717	0.165712
	54.33	0.089485	3387.35	0.116384	1.24305	0.089485
	54.435	0.114573	3394.7	0.981308	1.215	0.114573
	54.54	0.112545	3402.06	0.9114	1.23182	0.112545
	54.645	0.113702	3409.41	0.9513	1.22709	0.113702
	54.75	0.121931	3416.77	1.23499	1.20122	0.121931
	54.855	0.12123	3424.13	1.21082	1.16506	0.12123
	54.96	0.123497	3431.49	1.28898	1.08833	0.123497
	55.065	0.115305	3438.86	1.00655	1.08098	0.115305
	55.17	0.142145	3446.23	1.9319	1.05496	0.142145
	55.275	0.105943	3453.6	0.683777	1.04672	0.105943
	55.38	0.0998835	3460.97	0.474882	1.04416	0.0998835
	55.485	0.118533	3468.34	1.11786	1.04926	0.118533
	55.59	0.134053	3475.72	1.65291	0.978934	0.134053
	55.695	0.116276	3483.1	1.04004	1.02505	0.116276
	55.8	0.0985135	3490.49	0.427653	1.01106	0.0985135
	55.905	0.111863	3497.87	0.887902	1.0301	0.111863
	56.01	0.100311	3505.26	0.489616	1.02283	0.100311
	56.115	0.108346	3512.65	0.76662	1.01773	0.108346
	56.22	0.11574	3520.05	1.02154	1.02024	0.11574
	56.325	0.116023	3527.44	1.03129	1.01789	0.116023
	56.43	0.127402	3534.84	1.42361	1.03334	0.127402
	56.535	0.116412	3542.24	1.04471	1.01547	0.116412
	56.64	0.121113	3549.65	1.20678	1.07157	0.121113
	56.745	0.10306	3557.05	0.584386	1.09511	0.10306
	56.85	0.114713	3564.46	0.986138	1.08317	0.114713
	56.955	0.122926	3571.88	1.2693	1.05622	0.122926
	57.06	0.104425	3579.29	0.631463	1.08312	0.104425
	57.165	0.126352	3586.71	1.3874	1.11292	0.126352
	57.27	0.108431	3594.13	0.769559	1.1314	0.108431
	57.375	0.118238	3601.55	1.10766	1.15309	0.118238
	57.48	0.12305	3608.97	1.27359	1.19653	0.12305
	57.585	0.12179	3616.4	1.23015	1.22338	0.12179
	57.69	0.126507	3623.83	1.39277	1.23988	0.126507
	57.795	0.129184	3631.26	1.48505	1.22729	0.129184
	57.9	0.146624	3638.7	2.0863	1.26355	0.146624
	58.005	0.116952	3646.14	1.06335	1.26835	0.116952
	58.11	0.109878	3653.58	0.819441	1.30487	0.109878
	58.215	0.114514	3661.02	0.979293	1.35425	0.114514
	58.32	0.135776	3668.46	1.71231	1.38582	0.135776
	58.425	0.120123	3675.91	1.17267	1.42364	0.120123
	58.53	0.125266	3683.36	1.34999	1.43564	0.125266
	58.635	0.11604	3690.82	1.03189	1.45191	0.11604
	58.74	0.139848	3698.27	1.8527	1.46074	0.139848
	58.845	0.135208	3705.73	1.69274	1.42227	0.135208
	58.95	0.127984	3713.19	1.44368	1.43445	0.127984
	59.055	0.118276	3720.65	1.10897	1.45285	0.118276
	59.16	0.142705	3728.12	1.95118	1.4587	0.142705
	59.265	0.124591	3735.59	1.32669	1.41332	0.124591
	59.37	0.129546	3743.06	1.49752	1.44475	0.129546
	59.475	0.150518	3750.53	2.22056	1.47881	0.150518
	59.58	0.145818	3758.01	2.05851	1.50684	0.145818
	59.685	0.131852	3765.49	1.57704	1.51862	0.131852
	59.79	0.135055	3772.97	1.68744	1.55231	0.135055
	59.895	0.120227	3780.45	1.17626	1.547	0.120227
	60	0.124642	3787.94	1.32845	1.56551	0.124642
	60.105	0.0951539	3795.43	0.311826	1.5535	0.0951539
	60.21	0.130622	3802.92	1.53464	1.53446	0.130622
	60.315	0.139851	3810.42	1.8528	1.53878	0.139851
	60.42	0.133426	3817.91	1.63129	1.56808	0.133426
	60.525	0.113713	3825.41	0.951681	1.55916	0.113713
	60.63	0.139747	3832.91	1.84923	1.56558	0.139747
	60.735	0.134576	3840.42	1.67094	1.59236	0.134576
	60.84	0.134836	3847.93	1.6799	1.60123	0.134836
	60.945	0.144324	3855.44	2.00702	1.57709	0.144324
	61.05	0.144553	3862.95	2.01491	1.57976	0.144553
	61.155	0.121415	3870.46	1.21719	1.57467	0.121415
	61.26	0.129462	3877.98	1.49462	1.624	0.129462
	61.365	0.131139	3885.5	1.55243	1.66303	0.131139
	61.47	0.121399	3893.02	1.21664	1.74393	0.121399
	61.575	0.131117	3900.55	1.55169	1.74433	0.131117
	61.68	0.139526	3908.08	1.84159	1.7427	0.139526
	61.785	0.136234	3915.61	1.72809	1.76745	0.136234
	61.89	0.129249	3923.14	1.48728	1.79991	0.129249
	61.995	0.148964	3930.67	2.16699	1.83284	0.148964
	62.1	0.156952	3938.21	2.44237	1.83183	0.156952
	62.205	0.12831	3945.75	1.45492	1.82264	0.12831
	62.31	0.133789	3953.3	1.64382	1.77763	0.133789
	62.415	0.131364	3960.84	1.56022	1.77468	0.131364
	62.52	0.156	3968.39	2.40954	1.79424	0.156
	62.625	0.152945	3975.94	2.30425	1.80177	0.152945
	62.73	0.153815	3983.5	2.33423	1.80804	0.153815
	62.835	0.130911	3991.05	1.54459	1.86094	0.130911
	62.94	0.13867	3998.61	1.81209	1.86534	0.13867
	63.045	0.151374	4006.17	2.25006	1.83316	0.151374
	63.15	0.137248	4013.74	1.76306	1.8459	0.137248
	63.255	0.163629	4021.3	2.67259	1.8817	0.163629
	63.36	0.133845	4028.87	1.64574	1.91329	0.133845
	63.465	0.128169	4036.44	1.45007	1.88566	0.128169
	63.57	0.111684	4044.02	0.881706	1.91263	0.111684
	63.675	0.142417	4051.59	1.94127	1.9242	0.142417
	63.78	0.135601	4059.17	1.70627	1.90462	0.135601
	63.885	0.13492	4066.76	1.6828	1.87001	0.13492
	63.99	0.135681	4074.34	1.70905	1.86135	0.135681
	64.095	0.159761	4081.93	2.53922	1.84092	0.159761
	64.2	0.134311	4089.52	1.66179	1.88166	0.134311
	64.305	0.116186	4097.11	1.03692	1.92571	0.116186
	64.41	0.145471	4104.7	2.04655	1.96808	0.145471
	64.515	0.155216	4112.3	2.38252	1.98237	0.155216
	64.62	0.171865	4119.9	2.95651	1.99259	0.171865
	64.725	0.136918	4127.5	1.7517	2.02732	0.136918
	64.83	0.147872	4135.11	2.12932	2.08759	0.147872
	64.935	0.142176	4142.72	1.93297	2.19645	0.142176
	65.04	0.117164	4150.33	1.07063	2.23134	0.117164
	65.145	0.130904	4157.94	1.54434	2.28706	0.130904
	65.25	0.146667	4165.56	2.08778	2.36742	0.146667
	65.355	0.138999	4173.17	1.82343	2.4236	0.138999
	65.46	0.160451	4180.79	2.56301	2.40783	0.160451
	65.565	0.170616	4188.42	2.91346	2.46262	0.170616
	65.67	0.182095	4196.04	3.3092	2.52673	0.182095
	65.775	0.147613	4203.67	2.1204	2.54043	0.147613
	65.88	0.171041	4211.3	2.92812	2.55443	0.171041
	65.985	0.159028	4218.94	2.51395	2.53075	0.159028
	66.09	0.171872	4226.57	2.95677	2.60663	0.171872
	66.195	0.190622	4234.21	3.60318	2.62367	0.190622
	66.3	0.167723	4241.85	2.81371	2.62591	0.167723
	66.405	0.176	4249.5	3.09908	2.70986	0.176
	66.51	0.193198	4257.14	3.69198	2.72006	0.193198
	66.615	0.17642	4264.79	3.11356	2.71109	0.17642
	66.72	0.148323	4272.44	2.14487	2.71032	0.148323
	66.825	0.174039	4280.1	3.03147	2.68868	0.174039
	66.93	0.162675	4287.75	2.63969	2.677	0.162675
	67.035	0.155408	4295.41	2.38916	2.66985	0.155408
	67.14	0.165369	4303.07	2.73257	2.64043	0.165369
	67.245	0.154692	4310.74	2.36446	2.59334	0.154692
	67.35	0.191941	4318.41	3.64865	2.59235	0.191941
	67.455	0.160225	4326.08	2.55523	2.60673	0.160225
	67.56	0.1438	4333.75	1.98894	2.58055	0.1438
	67.665	0.178041	4341.42	3.16943	2.62792	0.178041
	67.77	0.138301	4349.1	1.79936	2.6012	0.138301
	67.875	0.140163	4356.78	1.86356	2.52804	0.140163
	67.98	0.138443	4364.46	1.80426	2.53017	0.138443
	68.085	0.144759	4372.15	2.022	2.55874	0.144759
	68.19	0.162145	4379.83	2.62142	2.60443	0.162145
	68.295	0.176907	4387.52	3.13035	2.64329	0.176907
	68.4	0.126278	4395.22	1.38486	2.60723	0.126278
	68.505	0.136898	4402.91	1.75101	2.59767	0.136898
	68.61	0.158311	4410.61	2.48922	2.66074	0.158311
	68.715	0.182298	4418.31	3.31619	2.63654	0.182298
	68.82	0.171638	4426.01	2.94869	2.61812	0.171638
	68.925	0.202071	4433.72	3.99789	2.63138	0.202071
	69.03	0.156624	4441.43	2.43106	2.59565	0.156624
	69.135	0.14015	4449.14	1.8631	2.65474	0.14015
	69.24	0.177968	4456.85	3.16692	2.73227	0.177968
	69.345	0.169034	4464.57	2.85891	2.80576	0.169034
	69.45	0.207172	4472.29	4.17375	2.79606	0.207172
	69.555	0.190854	4480.01	3.61117	2.87025	0.190854
	69.66	0.129266	4487.73	1.48786	2.85783	0.129266
	69.765	0.158433	4495.46	2.49343	2.9284	0.158433
	69.87	0.20043	4503.19	3.94133	3.00514	0.20043
	69.975	0.17439	4510.92	3.04358	3.05409	0.17439
	70.08	0.146868	4518.65	2.09474	3.00159	0.146868
	70.185	0.153414	4526.39	2.3204	2.9936	0.153414
	70.29	0.15213	4534.13	2.27613	2.90819	0.15213
	70.395	0.181154	4541.87	3.27675	2.8777	0.181154
	70.5	0.196381	4549.61	3.80172	2.9176	0.196381
	70.605	0.191732	4557.36	3.64145	2.91831	0.191732
	70.71	0.137725	4565.11	1.77951	2.94702	0.137725
	70.815	0.215942	4572.86	4.4761	2.91414	0.215942
	70.92	0.167907	4580.62	2.82007	2.89856	0.167907
	71.025	0.177447	4588.38	3.14896	2.9414	0.177447
	71.13	0.192547	4596.13	3.66955	2.99484	0.192547
	71.235	0.193808	4603.9	3.71304	2.97136	0.193808
	71.34	0.144224	4611.66	2.00358	2.99751	0.144224
	71.445	0.165843	4619.43	2.74891	3.05245	0.165843
	71.55	0.140137	4627.2	1.86266	3.06338	0.140137
	71.655	0.134518	4634.97	1.66893	3.04366	0.134518
	71.76	0.169083	4642.75	2.8606	3.02776	0.169083
	71.865	0.178479	4650.53	3.18454	3.00218	0.178479
	71.97	0.189852	4658.31	3.57663	2.93975	0.189852
	72.075	0.183333	4666.09	3.3519	2.99749	0.183333
	72.18	0.179557	4673.87	3.22172	2.95536	0.179557
	72.285	0.160329	4681.66	2.55882	2.94455	0.160329
	72.39	0.197186	4689.45	3.82949	2.97659	0.197186
	72.495	0.183403	4697.25	3.35432	2.93191	0.183403
	72.6	0.19335	4705.04	3.69722	2.9719	0.19335
	72.705	0.18671	4712.84	3.46831	2.98835	0.18671
	72.81	0.161341	4720.64	2.59368	3.01692	0.161341
	72.915	0.137827	4728.45	1.78301	3.12899	0.137827
	73.02	0.169629	4736.25	2.87942	3.22237	0.169629
	73.125	0.177826	4744.06	3.16203	3.202	0.177826
	73.23	0.146464	4751.87	2.08081	3.24554	0.146464
	73.335	0.179592	4759.69	3.22291	3.25738	0.179592
	73.44	0.185394	4767.5	3.42296	3.32987	0.185394
	73.545	0.16007	4775.32	2.54987	3.3606	0.16007
	73.65	0.200682	4783.14	3.95	3.40584	0.200682
	73.755	0.160148	4790.97	2.55256	3.42411	0.160148
	73.86	0.222807	4798.79	4.71278	3.44985	0.222807
	73.965	0.156149	4806.62	2.4147	3.43611	0.156149
	74.07	0.186563	4814.46	3.46326	3.39976	0.186563
	74.175	0.221399	4822.29	4.66424	3.39706	0.221399
	74.28	0.202236	4830.13	4.00359	3.48025	0.202236
	74.385	0.154313	4837.97	2.35139	3.46135	0.154313
	74.49	0.210048	4845.81	4.27292	3.4487	0.210048
	74.595	0.19844	4853.65	3.8727	3.47712	0.19844
	74.7	0.235894	4861.5	5.16399	3.42732	0.235894
	74.805	0.201846	4869.35	3.99015	3.34346	0.201846
	74.91	0.193131	4877.2	3.6897	3.34653	0.193131
	75.015	0.210435	4885.06	4.28625	3.2564	0.210435
	75.12	0.202071	4892.92	3.9979	3.25189	0.202071
	75.225	0.183383	4900.78	3.35361	3.13386	0.183383
	75.33	0.160354	4908.64	2.55966	3.15032	0.160354
	75.435	0.159382	4916.51	2.52615	3.08549	0.159382
	75.54	0.198151	4924.37	3.86274	2.99661	0.198151
	75.645	0.155921	4932.25	2.40685	2.92179	0.155921
	75.75	0.168654	4940.12	2.84582	2.93714	0.168654
	75.855	0.167075	4947.99	2.79138	2.8687	0.167075
	75.96	0.143474	4955.87	1.97772	2.81349	0.143474
	76.065	0.12459	4963.75	1.32665	2.69736	0.12459
	76.17	0.162295	4971.64	2.62659	2.64002	0.162295
	76.275	0.135326	4979.52	1.69682	2.56797	0.135326
	76.38	0.156874	4987.41	2.4397	2.51528	0.156874
	76.485	0.137218	4995.3	1.76202	2.49535	0.137218
	76.59	0.168082	5003.2	2.8261	2.42247	0.168082
	76.695	0.139554	5011.09	1.84255	2.40105	0.139554
	76.8	0.156947	5018.99	2.44222	2.35259	0.156947
	76.905	0.147986	5026.89	2.13325	2.30767	0.147986
	77.01	0.165442	5034.8	2.73507	2.30188	0.165442
	77.115	0.160423	5042.7	2.56203	2.25631	0.160423
	77.22	0.1584	5050.61	2.4923	2.25825	0.1584
	77.325	0.151685	5058.53	2.26078	2.31079	0.151685
	77.43	0.160267	5066.44	2.55668	2.33294	0.160267
	77.535	0.140887	5074.36	1.88851	2.31907	0.140887
	77.64	0.172221	5082.28	2.9688	2.35434	0.172221
	77.745	0.187625	5090.2	3.49987	2.35448	0.187625
	77.85	0.130532	5098.12	1.5315	2.37986	0.130532
	77.955	0.144819	5106.05	2.0241	2.36113	0.144819
	78.06	0.124244	5113.98	1.31473	2.368	0.124244
	78.165	0.165577	5121.91	2.73975	2.37249	0.165577
	78.27	0.151724	5129.85	2.26214	2.38436	0.151724
	78.375	0.13561	5137.79	1.7066	2.38266	0.13561
	78.48	0.168479	5145.73	2.83977	2.38329	0.168479
	78.585	0.18157	5153.67	3.29111	2.3964	0.18157
	78.69	0.140656	5161.62	1.88055	2.44294	0.140656
	78.795	0.152235	5169.56	2.27975	2.4263	0.152235
	78.9	0.160901	5177.51	2.57853	2.44054	0.160901
	79.005	0.156979	5185.47	2.4433	2.44799	0.156979
	79.11	0.155621	5193.42	2.39649	2.42184	0.155621
	79.215	0.154501	5201.38	2.35788	2.46783	0.154501
	79.32	0.144538	5209.34	2.01438	2.50273	0.144538
	79.425	0.160203	5217.3	2.55447	2.55897	0.160203
	79.53	0.156594	5225.27	2.43004	2.53747	0.156594
	79.635	0.164205	5233.24	2.69243	2.56929	0.164205
	79.74	0.160878	5241.21	2.57771	2.56837	0.160878
	79.845	0.16791	5249.18	2.82016	2.51784	0.16791
	79.95	0.185433	5257.16	3.42428	2.52041	0.185433
	80.055	0.148202	5265.14	2.14072	2.56356	0.148202
	80.16	0.151208	5273.12	2.24435	2.58673	0.151208
	80.265	0.177629	5281.11	3.15523	2.61332	0.177629
	80.37	0.16866	5289.09	2.84603	2.69278	0.16866
	80.475	0.163883	5297.08	2.68135	2.75736	0.163883
	80.58	0.170123	5305.07	2.89646	2.74894	0.170123
	80.685	0.165024	5313.07	2.72067	2.81219	0.165024
	80.79	0.149991	5321.06	2.20239	2.86194	0.149991
	80.895	0.174795	5329.06	3.05752	2.91297	0.174795
	81	0.134943	5337.07	1.68359	2.96564	0.134943
	81.105	0.131841	5345.07	1.57666	3.03504	0.131841
	81.21	0.183432	5353.08	3.35531	3.09717	0.183432
	81.315	0.17195	5361.09	2.95944	3.14061	0.17195
	81.42	0.169035	5369.1	2.85896	3.17895	0.169035
	81.525	0.180181	5377.12	3.24323	3.20611	0.180181
	81.63	0.214595	5385.13	4.42968	3.21259	0.214595
	81.735	0.20245	5393.15	4.01098	3.21759	0.20245
	81.84	0.148395	5401.18	2.14738	3.28231	0.148395
	81.945	0.190407	5409.2	3.59577	3.35696	0.190407
	82.05	0.196276	5417.23	3.79813	3.40551	0.196276
	82.155	0.1936	5425.26	3.70585	3.47998	0.1936
	82.26	0.2024	5433.29	4.00924	3.5406	0.2024
	82.365	0.2112	5441.33	4.31263	3.64273	0.2112
	82.47	0.21296	5449.37	4.37331	3.75951	0.21296
	82.575	0.216938	5457.41	4.51047	3.78977	0.216938
	82.68	0.176	5465.45	3.09908	3.81734	0.176
	82.785	0.170904	5473.5	2.92339	3.85817	0.170904
	82.89	0.182331	5481.54	3.31734	3.89189	0.182331
	82.995	0.172284	5489.6	2.97097	3.88499	0.172284
	83.1	0.210815	5497.65	4.29936	3.86625	0.210815
	83.205	0.224257	5505.71	4.76277	3.96753	0.224257
	83.31	0.200225	5513.76	3.93425	4.00894	0.200225
	83.415	0.203996	5521.83	4.06427	4.02658	0.203996
	83.52	0.218752	5529.89	4.57301	4.06367	0.218752
	83.625	0.209	5537.96	4.23678	4.06531	0.209
	83.73	0.216525	5546.03	4.4962	4.08923	0.216525
	83.835	0.205372	5554.1	4.11171	4.08331	0.205372
	83.94	0.191942	5562.17	3.6487	4.05153	0.191942
	84.045	0.198646	5570.25	3.87981	4.0785	0.198646
	84.15	0.204632	5578.33	4.08618	4.0867	0.204632
	84.255	0.209588	5586.41	4.25705	4.09793	0.209588
	84.36	0.188866	5594.49	3.54264	4.09936	0.188866
	84.465	0.221834	5602.58	4.67926	4.0517	0.221834
	84.57	0.220439	5610.67	4.63116	3.99817	0.220439
	84.675	0.209068	5618.76	4.23912	3.93363	0.209068
	84.78	0.220496	5626.86	4.63311	3.92764	0.220496
	84.885	0.203585	5634.96	4.05011	3.88408	0.203585
	84.99	0.228549	5643.06	4.91075	3.82793	0.228549
	85.095	0.208669	5651.16	4.22536	3.77374	0.208669
	85.2	0.193891	5659.26	3.71589	3.75972	0.193891
	85.305	0.195556	5667.37	3.77327	3.72533	0.195556
	85.41	0.17685	5675.48	3.12839	3.69716	0.17685
	85.515	0.190473	5683.59	3.59803	3.65776	0.190473
	85.62	0.173327	5691.71	3.00693	3.55494	0.173327
	85.725	0.176254	5699.83	3.10784	3.51505	0.176254
	85.83	0.185439	5707.95	3.4245	3.45905	0.185439
	85.935	0.153424	5716.07	2.32073	3.42189	0.153424
	86.04	0.199654	5724.2	3.91456	3.38078	0.199654
	86.145	0.187161	5732.33	3.48386	3.31998	0.187161
	86.25	0.168283	5740.46	2.83303	3.30481	0.168283
	86.355	0.177231	5748.59	3.1415	3.19183	0.177231
	86.46	0.195208	5756.73	3.7613	3.10144	0.195208
	86.565	0.167001	5764.87	2.78884	3.10483	0.167001
	86.67	0.178219	5773.01	3.17559	3.07806	0.178219
	86.775	0.176062	5781.15	3.1012	3.09421	0.176062
	86.88	0.13503	5789.3	1.68659	3.10922	0.13503
	86.985	0.159934	5797.45	2.54519	3.10389	0.159934
	87.09	0.18123	5805.6	3.27937	3.11153	0.18123
	87.195	0.193494	5813.75	3.7022	3.10809	0.193494
	87.3	0.179255	5821.91	3.21131	3.15747	0.179255
	87.405	0.176408	5830.07	3.11314	3.12791	0.176408
	87.51	0.192582	5838.23	3.67077	3.0934	0.192582
	87.615	0.146627	5846.4	2.08642	3.0901	0.146627
	87.72	0.143121	5854.56	1.96553	3.09763	0.143121
	87.825	0.196349	5862.73	3.80064	3.12141	0.196349
	87.93	0.17614	5870.9	3.10391	3.1444	0.17614
	88.035	0.188566	5879.08	3.53231	3.20636	0.188566
	88.14	0.201356	5887.26	3.97324	3.20627	0.201356
	88.245	0.169463	5895.44	2.8737	3.28614	0.169463
	88.35	0.181796	5903.62	3.29891	3.31108	0.181796
	88.455	0.182942	5911.8	3.33841	3.32373	0.182942
	88.56	0.189229	5919.99	3.55517	3.33861	0.189229
	88.665	0.178222	5928.18	3.17567	3.40907	0.178222
	88.77	0.162137	5936.37	2.62114	3.49912	0.162137
	88.875	0.165888	5944.57	2.75047	3.50318	0.165888
	88.98	0.182689	5952.77	3.32968	3.58167	0.182689
	89.085	0.212453	5960.97	4.35583	3.63733	0.212453
	89.19	0.183676	5969.17	3.36371	3.6214	0.183676
	89.295	0.223146	5977.38	4.72447	3.63148	0.223146
	89.4	0.175996	5985.59	3.09895	3.61241	0.175996
	89.505	0.192944	5993.8	3.68325	3.62777	0.192944
	89.61	0.178021	6002.01	3.16876	3.66559	0.178021
	89.715	0.190405	6010.23	3.59569	3.70377	0.190405
	89.82	0.204286	6018.44	4.07425	3.6635	0.204286
	89.925	0.230346	6026.67	4.97271	3.56955	0.230346
	90.03	0.241709	6034.89	5.36446	3.58997	0.241709
	90.135	0.195526	6043.12	3.77224	3.63252	0.195526
	90.24	0.203546	6051.35	4.04874	3.70296	0.203546
	90.345	0.183476	6059.58	3.35682	3.74671	0.183476
	90.45	0.1848	6067.81	3.40246	3.76818	0.1848
	90.555	0.183455	6076.05	3.35609	3.79979	0.183455
	90.66	0.174732	6084.29	3.05535	3.75352	0.174732
	90.765	0.212498	6092.53	4.35739	3.77987	0.212498
	90.87	0.196886	6100.77	3.81916	3.78412	0.196886
	90.975	0.209478	6109.02	4.25327	3.79377	0.209478
	91.08	0.153747	6117.27	2.33189	3.80163	0.153747
	91.185	0.121097	6125.52	1.20625	3.78461	0.121097
	91.29	0.193032	6133.78	3.68628	3.72611	0.193032
	91.395	0.192991	6142.03	3.68486	3.63733	0.192991
	91.5	0.216964	6150.29	4.51135	3.65412	0.216964
	91.605	0.214413	6158.56	4.42341	3.62324	0.214413
	91.71	0.228028	6166.82	4.89279	3.61899	0.228028
	91.815	0.206591	6175.09	4.15373	3.59433	0.206591
	91.92	0.189594	6183.36	3.56775	3.57143	0.189594
	92.025	0.195107	6191.63	3.75781	3.55627	0.195107
	92.13	0.196023	6199.91	3.78939	3.48104	0.196023
	92.235	0.185024	6208.18	3.41019	3.47234	0.185024
	92.34	0.196103	6216.47	3.79215	3.47442	0.196103
	92.445	0.19194	6224.75	3.64863	3.47246	0.19194
	92.55	0.187926	6233.03	3.51024	3.53063	0.187926
	92.655	0.177333	6241.32	3.14503	3.50527	0.177333
	92.76	0.207701	6249.61	4.19198	3.44812	0.207701
	92.865	0.181153	6257.91	3.27672	3.37314	0.181153
	92.97	0.180391	6266.2	3.25045	3.28823	0.180391
	93.075	0.166925	6274.5	2.7862	3.20845	0.166925
	93.18	0.166843	6282.8	2.78337	3.15367	0.166843
	93.285	0.16374	6291.11	2.67641	3.15204	0.16374
	93.39	0.157947	6299.41	2.47669	3.14511	0.157947
	93.495	0.190575	6307.72	3.60157	3.13219	0.190575
	93.6	0.210991	6316.03	4.30543	3.1023	0.210991
	93.705	0.152327	6324.35	2.28294	3.06416	0.152327
	93.81	0.163276	6332.66	2.6604	2.97036	0.163276
	93.915	0.174644	6340.98	3.05233	2.89595	0.174644
	94.02	0.15155	6349.3	2.25613	2.81477	0.15155
	94.125	0.162589	6357.63	2.6367	2.64287	0.162589
	94.23	0.152846	6365.95	2.30083	2.60985	0.152846
	94.335	0.17017	6374.28	2.89809	2.55808	0.17017
	94.44	0.166868	6382.62	2.78423	2.58691	0.166868
	94.545	0.188414	6390.95	3.52705	2.63204	0.188414
	94.65	0.19008	6399.29	3.5845	2.68736	0.19008
	94.755	0.186658	6407.63	3.46652	2.72593	0.186658
	94.86	0.163351	6415.97	2.663	2.76323	0.163351
	94.965	0.168444	6424.32	2.83859	2.70228	0.168444
	95.07	0.123924	6432.66	1.3037	2.69831	0.123924
	95.175	0.133968	6441.01	1.64997	2.72901	0.133968
	95.28	0.118462	6449.37	1.11538	2.75833	0.118462
	95.385	0.0830543	6457.72	-0.10532	2.80379	0.0830543
	95.49	0.157206	6466.08	2.45112	2.80285	0.157206
	95.595	0.142848	6474.44	1.95613	2.82264	0.142848
	95.7	0.187833	6482.8	3.50702	2.83789	0.187833
	95.805	0.19957	6491.17	3.91169	2.82524	0.19957
	95.91	0.20385	6499.54	4.05922	2.76707	0.20385
	96.015	0.185916	6507.91	3.44095	2.70567	0.185916
	96.12	0.217626	6516.28	4.53419	2.65678	0.217626
	96.225	0.166792	6524.66	2.78163	2.66031	0.166792
	96.33	0.14945	6533.03	2.18372	2.62443	0.14945
	96.435	0.185539	6541.41	3.42795	2.68839	0.185539
	96.54	0.195902	6549.8	3.78522	2.78416	0.195902
	96.645	0.184517	6558.18	3.39271	2.8899	0.184517
	96.75	0.161904	6566.57	2.61311	2.99036	0.161904
	96.855	0.1672	6574.96	2.79569	3.01066	0.1672
	96.96	0.181226	6583.36	3.27925	3.03333	0.181226
	97.065	0.157696	6591.76	2.46802	2.93136	0.157696
	97.17	0.146229	6600.15	2.07269	2.86202	0.146229
	97.275	0.145558	6608.56	2.04956	2.78637	0.145558
	97.38	0.151209	6616.96	2.24439	2.74039	0.151209
	97.485	0.165912	6625.37	2.75128	2.64943	0.165912
	97.59	0.142423	6633.78	1.94148	2.65506	0.142423
	97.695	0.170304	6642.19	2.9027	2.66664	0.170304
	97.8	0.203415	6650.6	4.04423	2.6427	0.203415
	97.905	0.195136	6659.02	3.75882	2.58555	0.195136
	98.01	0.155906	6667.44	2.40632	2.5456	0.155906
	98.115	0.171923	6675.86	2.9585	2.55502	0.171923
	98.22	0.159288	6684.29	2.52293	2.54631	0.159288
	98.325	0.113888	6692.71	0.957702	2.54896	0.113888
	98.43	0.149292	6701.14	2.17831	2.53246	0.149292
	98.535	0.148989	6709.58	2.16784	2.56362	0.148989
	98.64	0.152575	6718.01	2.29147	2.56672	0.152575
	98.745	0.151666	6726.45	2.26014	2.58256	0.151666
	98.85	0.170879	6734.89	2.92253	2.58029	0.170879
	98.955	0.157842	6743.33	2.47307	2.58904	0.157842
	99.06	0.168183	6751.78	2.82959	2.58224	0.168183
	99.165	0.154458	6760.23	2.3564	2.54968	0.154458
	99.27	0.155548	6768.68	2.39398	2.59954	0.155548
	99.375	0.168733	6777.13	2.84853	2.67863	0.168733
	99.48	0.160883	6785.59	2.57791	2.71195	0.160883
	99.585	0.183148	6794.04	3.34551	2.72138	0.183148
	99.69	0.145738	6802.51	2.05575	2.84702	0.145738
	99.795	0.168819	6810.97	2.85152	2.85813	0.168819
	99.9	0.147806	6819.43	2.12705	2.91721	0.147806
	100.005	0.162697	6827.9	2.64043	2.97181	0.162697
	100.11	0.164267	6836.37	2.69456	3.00348	0.164267
	100.215	0.148766	6844.85	2.16014	2.99524	0.148766
	100.32	0.165374	6853.32	2.73275	3.03417	0.165374
	100.425	0.179807	6861.8	3.23032	3.05713	0.179807
	100.53	0.231287	6870.29	5.00516	3.12801	0.231287
	100.635	0.213258	6878.77	4.38358	3.15351	0.213258
	100.74	0.196087	6887.26	3.79159	3.17444	0.196087
	100.845	0.166126	6895.75	2.75868	3.17009	0.166126
	100.95	0.204998	6904.24	4.09879	3.15703	0.204998
	101.055	0.157348	6912.73	2.45605	3.23966	0.157348
	101.16	0.191826	6921.23	3.64468	3.278	0.191826
	101.265	0.19217	6929.73	3.65657	3.30488	0.19217
	101.37	0.174632	6938.23	3.0519	3.32721	0.174632
	101.475	0.164906	6946.74	2.7166	3.36124	0.164906
	101.58	0.186071	6955.24	3.44628	3.41531	0.186071
	101.685	0.18483	6963.75	3.40351	3.45673	0.18483
	101.79	0.205855	6972.26	4.12837	3.48347	0.205855
	101.895	0.174044	6980.78	3.03165	3.41087	0.174044
	102	0.183904	6989.3	3.37157	3.30156	0.183904
	102.105	0.157735	6997.82	2.46939	3.20302	0.157735
	102.21	0.173672	7006.34	3.01883	3.15046	0.173672
	102.315	0.205656	7014.87	4.12148	3.06535	0.205656
	102.42	0.196621	7023.39	3.80999	3.0469	0.196621
	102.525	0.167298	7031.92	2.79907	3.02001	0.167298
	102.63	0.178893	7040.46	3.19881	2.93149	0.178893
	102.735	0.188938	7048.99	3.54514	2.9102	0.188938
	102.84	0.187981	7057.53	3.51212	2.93679	0.187981
	102.945	0.195407	7066.07	3.76814	2.90074	0.195407
	103.05	0.199199	7074.62	3.89888	2.80966	0.199199
	103.155	0.178638	7083.16	3.19002	2.75039	0.178638
	103.26	0.133998	7091.71	1.65102	2.76709	0.133998
	103.365	0.124629	7100.26	1.328	2.73856	0.124629
	103.47	0.128015	7108.82	1.44476	2.75265	0.128015
	103.575	0.143276	7117.37	1.97087	2.75586	0.143276
	103.68	0.143971	7125.93	1.99483	2.74231	0.143971
	103.785	0.172325	7134.49	2.97237	2.73788	0.172325
	103.89	0.127985	7143.06	1.44372	2.78649	0.127985
	103.995	0.159192	7151.62	2.5196	2.85027	0.159192
	104.1	0.184186	7160.19	3.3813	2.82082	0.184186
	104.205	0.159928	7168.76	2.54497	2.74912	0.159928
	104.31	0.118787	7177.34	1.1266	2.71518	0.118787
	104.415	0.162879	7185.91	2.64672	2.63022	0.162879
	104.52	0.186154	7194.49	3.44914	2.626	0.186154
	104.625	0.163216	7203.08	2.65834	2.68596	0.163216
	104.73	0.167948	7211.66	2.82147	2.76694	0.167948
	104.835	0.176	7220.25	3.09908	2.85889	0.176
	104.94	0.195831	7228.84	3.78277	2.91465	0.195831
	105.045	0.193407	7237.43	3.69919	2.94216	0.193407
	105.15	0.202549	7246.03	4.01439	2.93705	0.202549
	105.255	0.225146	7254.62	4.79342	2.98614	0.225146
	105.36	0.167582	7263.22	2.80885	3.00286	0.167582
	105.465	0.135989	7271.83	1.71967	2.95868	0.135989
	105.57	0.170795	7280.43	2.91962	2.95199	0.170795
	105.675	0.137587	7289.04	1.77475	3.00838	0.137587
	105.78	0.175578	7297.65	3.08452	3.02683	0.175578
	105.885	0.177479	7306.26	3.15007	2.99945	0.177479
	105.99	0.183352	7314.88	3.35254	3.00089	0.183352
	106.095	0.194694	7323.5	3.74357	3.01811	0.194694
	106.2	0.183704	7332.12	3.36467	3.03307	0.183704
	106.305	0.163922	7340.74	2.68266	2.97843	0.163922
	106.41	0.168623	7349.37	2.84474	2.94533	0.168623
	106.515	0.163582	7357.99	2.67094	2.92697	0.163582
	106.62	0.171312	7366.63	2.93746	2.82772	0.171312
	106.725	0.152152	7375.26	2.27688	2.83653	0.152152
	106.83	0.155078	7383.9	2.37778	2.93256	0.155078
	106.935	0.159677	7392.53	2.53634	2.89471	0.159677
	107.04	0.176253	7401.18	3.1078	2.88809	0.176253
	107.145	0.166306	7409.82	2.76486	2.80701	0.166306
	107.25	0.164256	7418.47	2.69419	2.78786	0.164256
	107.355	0.180436	7427.11	3.252	2.77518	0.180436
	107.46	0.186849	7435.77	3.47312	2.74056	0.186849
	107.565	0.156209	7444.42	2.41675	2.76684	0.156209
	107.67	0.169404	7453.08	2.87166	2.83077	0.169404
	107.775	0.18924	7461.74	3.55552	2.85564	0.18924
	107.88	0.153169	7470.4	2.31196	2.8607	0.153169
	107.985	0.17397	7479.06	3.0291	2.80893	0.17397
	108.09	0.205631	7487.73	4.12063	2.82799	0.205631
	108.195	0.143345	7496.4	1.97326	2.85606	0.143345
	108.3	0.132786	7505.07	1.60922	2.83028	0.132786
	108.405	0.116781	7513.75	1.05744	2.81189	0.116781
	108.51	0.163597	7522.43	2.67147	2.81499	0.163597
	108.615	0.174154	7531.11	3.03544	2.84619	0.174154
	108.72	0.16959	7539.79	2.87807	2.84675	0.16959
	108.825	0.202761	7548.47	4.02169	2.80346	0.202761
	108.93	0.210284	7557.16	4.28104	2.82452	0.210284
	109.035	0.186653	7565.85	3.46636	2.79068	0.186653
	109.14	0.167254	7574.54	2.79754	2.74411	0.167254
	109.245	0.133767	7583.24	1.64304	2.73771	0.133767
	109.35	0.165977	7591.94	2.75353	2.70328	0.165977
	109.455	0.175429	7600.64	3.07938	2.63926	0.175429
	109.56	0.140986	7609.34	1.89193	2.67421	0.140986
	109.665	0.162919	7618.05	2.64811	2.68603	0.162919
	109.77	0.168554	7626.76	2.84237	2.71438	0.168554
	109.875	0.186881	7635.47	3.4742	2.70718	0.186881
	109.98	0.180838	7644.18	3.26588	2.63691	0.180838
	110.085	0.155457	7652.9	2.39085	2.56995	0.155457
	110.19	0.171483	7661.61	2.94334	2.48667	0.171483
	110.295	0.144863	7670.34	2.02559	2.42915	0.144863
	110.4	0.155471	7679.06	2.39132	2.39617	0.155471
	110.505	0.148531	7687.79	2.15205	2.41251	0.148531
	110.61	0.149004	7696.52	2.16836	2.44893	0.149004
	110.715	0.159205	7705.25	2.52004	2.40795	0.159205
	110.82	0.16869	7713.98	2.84706	2.3397	0.16869
	110.925	0.141352	7722.72	1.90454	2.33701	0.141352
	111.03	0.137341	7731.46	1.76627	2.28765	0.137341
	111.135	0.158373	7740.2	2.49137	2.23477	0.158373
	111.24	0.1232	7748.94	1.27874	2.16398	0.1232
	111.345	0.121039	7757.69	1.20425	2.10842	0.121039
	111.45	0.142367	7766.44	1.93954	2.1521	0.142367
	111.555	0.168571	7775.19	2.84297	2.10149	0.168571
	111.66	0.16274	7783.95	2.64191	2.08871	0.16274
	111.765	0.179106	7792.7	3.20615	2.11373	0.179106
	111.87	0.160177	7801.46	2.55355	2.1172	0.160177
	111.975	0.136258	7810.23	1.72893	2.13084	0.136258
	112.08	0.125939	7818.99	1.37318	2.10192	0.125939
	112.185	0.139032	7827.76	1.82458	2.06156	0.139032
	112.29	0.127128	7836.53	1.41418	2.07626	0.127128
	112.395	0.130212	7845.3	1.5205	2.13873	0.130212
	112.5	0.135545	7854.08	1.70435	2.11392	0.135545
	112.605	0.140552	7862.86	1.87697	2.16913	0.140552
	112.71	0.187129	7871.64	3.48277	2.17877	0.187129
	112.815	0.134784	7880.42	1.6781	2.16195	0.134784
	112.92	0.135595	7889.21	1.70606	2.12664	0.135595
	113.025	0.173612	7897.99	3.01674	2.13202	0.173612
	113.13	0.151051	7906.78	2.23894	2.0667	0.151051
	113.235	0.158895	7915.58	2.50936	2.04332	0.158895
	113.34	0.138233	7924.37	1.79701	2.03344	0.138233
	113.445	0.139424	7933.17	1.83808	2.06665	0.139424
	113.55	0.152012	7941.97	2.27207	2.04497	0.152012
	113.655	0.182642	7950.78	3.32805	2.09134	0.182642
	113.76	0.140379	7959.58	1.871	2.14971	0.140379
	113.865	0.163239	7968.39	2.65913	2.16288	0.163239
	113.97	0.128029	7977.2	1.44524	2.14686	0.128029
	114.075	0.130168	7986.02	1.51898	2.07882	0.130168
	114.18	0.142965	7994.84	1.96015	2.14349	0.142965
	114.285	0.166642	8003.65	2.77644	2.1885	0.166642
	114.39	0.131737	8012.48	1.57305	2.17526	0.131737
	114.495	0.143229	8021.3	1.96925	2.22227	0.143229
	114.6	0.129088	8030.13	1.48173	2.28742	0.129088
	114.705	0.150022	8038.96	2.20347	2.26832	0.150022
	114.81	0.123312	8047.79	1.28261	2.28528	0.123312
	114.915	0.160757	8056.62	2.57357	2.29932	0.160757
	115.02	0.172534	8065.46	2.97957	2.2443	0.172534
	115.125	0.145098	8074.3	2.0337	2.30336	0.145098
	115.23	0.128935	8083.14	1.47646	2.35108	0.128935
	115.335	0.137794	8091.99	1.78187	2.39151	0.137794
	115.44	0.181677	8100.84	3.29481	2.43514	0.181677
	115.545	0.168229	8109.69	2.83118	2.48768	0.168229
	115.65	0.164014	8118.54	2.68586	2.4259	0.164014
	115.755	0.185138	8127.39	3.41411	2.45197	0.185138
	115.86	0.20614	8136.25	4.13819	2.51867	0.20614
	115.965	0.124382	8145.11	1.31948	2.50621	0.124382
	116.07	0.151724	8153.98	2.26214	2.5055	0.151724
	116.175	0.162192	8162.84	2.62302	2.5267	0.162192
	116.28	0.142743	8171.71	1.95251	2.48898	0.142743
	116.385	0.183206	8180.58	3.3475	2.46595	0.183206
	116.49	0.197844	8189.45	3.85216	2.46302	0.197844
	116.595	0.157344	8198.33	2.45588	2.48723	0.157344
	116.7	0.161805	8207.21	2.6097	2.4653	0.161805
	116.805	0.18107	8216.09	3.27387	2.40897	0.18107
	116.91	0.12184	8224.97	1.23187	2.38268	0.12184
	117.015	0.150637	8233.86	2.22466	2.32006	0.150637
	117.12	0.191602	8242.75	3.63697	2.23708	0.191602
	117.225	0.120049	8251.64	1.1701	2.13043	0.120049
	117.33	0.149509	8260.53	2.18578	2.10983	0.149509
	117.422	0.138683	8268.37	1.81253	2.03862	0.138683
	117.527	0.133403	8277.27	1.63049	1.90517	0.133403
	117.632	0.155837	8286.17	2.40395	1.86558	0.155837
	117.737	0.142969	8295.07	1.96031	1.77553	0.142969
	117.842	0.146495	8303.98	2.08186	1.67156	0.146495
	117.947	0.121891	8312.89	1.2336	1.63233	0.121891
	118.052	0.140829	8321.8	1.88653	1.53363	0.140829
	118.145	0.149164	8329.65	2.17387	1.41245	0.149164
	118.25	0.118612	8338.57	1.12055	1.44271	0.118612
	118.355	0.124962	8347.49	1.33948	1.41195	0.124962
	118.46	0.128804	8356.41	1.47196	1.31382	0.128804
	118.565	0.109445	8365.34	0.804532	1.31579	0.109445
	118.67	0.100085	8374.26	0.481833	1.33021	0.100085
	118.775	0.0654244	8383.19	-0.713128	1.32665	0.0654244
	118.88	0.114032	8392.12	0.962674	1.34281	0.114032
	118.985	0.117906	8401.06	1.09621	1.32586	0.117906
	119.09	0.122451	8410	1.25292	1.3123	0.122451
	119.195	0.128898	8418.94	1.47519	1.2898	0.128898
	119.3	0.0902317	8427.88	0.142127	1.30323	0.0902317
	119.405	0.0931969	8436.82	0.244355	1.29208	0.0931969
	119.51	0.143783	8445.77	1.98836	1.26917	0.143783
	119.615	0.12833	8454.72	1.45561	1.28296	0.12833
	119.72	0.120448	8463.67	1.18387	1.28779	0.120448
	119.825	0.121475	8472.63	1.21926	1.29683	0.121475
	119.93	0.159963	8481.59	2.54618	1.3477	0.159963
	120.035	0.136106	8490.55	1.72368	1.41803	0.136106
	120.14	0.145122	8499.51	2.03452	1.53135	0.145122
	120.245	0.143545	8508.48	1.98016	1.57663	0.143545
	120.35	0.133135	8517.44	1.62127	1.63449	0.133135
	120.455	0.13018	8526.41	1.5194	1.71411	0.13018
	120.56	0.131627	8535.39	1.56928	1.76563	0.131627
	120.665	0.132747	8544.36	1.60787	1.85486	0.132747
	120.77	0.13255	8553.34	1.60108	1.9539	0.13255
	120.875	0.128613	8562.32	1.46536	1.94943	0.128613
	120.98	0.128466	8571.31	1.46028	1.96921	0.128466
	121.085	0.135357	8580.29	1.69787	2.03812	0.135357
	121.19	0.146332	8589.28	2.07624	2.06566	0.146332
	121.295	0.151083	8598.27	2.24002	2.06003	0.151083
	121.4	0.147599	8607.27	2.11992	2.04735	0.147599
	121.505	0.146869	8616.26	2.09474	2.07601	0.146869
	121.61	0.159864	8625.26	2.54277	2.06671	0.159864
	121.715	0.180185	8634.26	3.24336	2.09008	0.180185
	121.82	0.166256	8643.27	2.76313	2.14949	0.166256
	121.925	0.154935	8652.27	2.37285	2.21649	0.154935
	122.03	0.165016	8661.28	2.7204	2.30494	0.165016
	122.135	0.140541	8670.3	1.8766	2.40667	0.140541
	122.24	0.142671	8679.31	1.95004	2.47806	0.142671
	122.345	0.17042	8688.33	2.90669	2.52388	0.17042
	122.45	0.141447	8697.35	1.90781	2.56461	0.141447
	122.555	0.155879	8706.37	2.40537	2.66647	0.155879
	122.66	0.126914	8715.39	1.40677	2.72908	0.126914
	122.765	0.1659	8724.42	2.75087	2.78805	0.1659
	122.87	0.136802	8733.45	1.74768	2.8161	0.136802
	122.975	0.150083	8742.48	2.20557	2.84605	0.150083
	123.08	0.173264	8751.52	3.00475	2.82923	0.173264
	123.185	0.18021	8760.56	3.24421	2.87008	0.18021
	123.29	0.196888	8769.6	3.81922	2.92576	0.196888
	123.395	0.206315	8778.64	4.1442	2.93295	0.206315
	123.5	0.180379	8787.69	3.25004	2.9421	0.180379
	123.605	0.161695	8796.73	2.60589	2.99301	0.161695
	123.71	0.164891	8805.78	2.71607	2.98628	0.164891
	123.815	0.220193	8814.84	4.62267	3.01466	0.220193
	123.92	0.19649	8823.89	3.80548	3.02248	0.19649
	124.025	0.190358	8832.95	3.59408	3.12863	0.190358
	124.13	0.16721	8842.01	2.79604	3.16542	0.16721
	124.235	0.181584	8851.08	3.29157	3.21193	0.181584
	124.34	0.167982	8860.14	2.82263	3.24388	0.167982
	124.445	0.19588	8869.21	3.78446	3.25788	0.19588
	124.55	0.195316	8878.28	3.765	3.2267	0.195316
	124.655	0.170228	8887.36	2.90007	3.15492	0.170228
	124.76	0.147173	8896.43	2.10524	3.11199	0.147173
	124.865	0.179592	8905.51	3.22291	3.06834	0.179592
	124.97	0.165537	8914.59	2.73835	3.06557	0.165537
	125.075	0.162028	8923.68	2.61736	3.02579	0.162028
	125.18	0.16155	8932.76	2.60089	2.89973	0.16155
	125.285	0.203886	8941.85	4.06047	2.79941	0.203886
	125.39	0.192575	8950.94	3.67053	2.73324	0.192575
	125.495	0.170532	8960.04	2.91054	2.71365	0.170532
	125.6	0.173253	8969.14	3.00437	2.68443	0.173253
	125.705	0.183414	8978.24	3.35467	2.63168	0.183414
	125.81	0.157604	8987.34	2.46484	2.52434	0.157604
	125.915	0.144833	8996.44	2.02457	2.43372	0.144833
	126.02	0.175182	9005.55	3.07088	2.37311	0.175182
	126.125	0.148733	9014.66	2.159	2.34937	0.148733
	126.23	0.15968	9023.77	2.53644	2.29838	0.15968
	126.335	0.13605	9032.89	1.72177	2.24213	0.13605
	126.44	0.128775	9042	1.47096	2.18912	0.128775
	126.545	0.123749	9051.12	1.29769	2.14429	0.123749
	126.65	0.142374	9060.25	1.9398	2.04526	0.142374
	126.755	0.153003	9069.37	2.30622	1.97201	0.153003
	126.86	0.160394	9078.5	2.56103	1.9197	0.160394
	126.965	0.129735	9087.63	1.50405	1.88982	0.129735
	127.07	0.118042	9096.76	1.10093	1.82195	0.118042
	127.175	0.129602	9105.9	1.49947	1.81539	0.129602
	127.28	0.126276	9115.04	1.38478	1.85823	0.126276
	127.385	0.129959	9124.18	1.51177	1.79327	0.129959
	127.49	0.142613	9133.32	1.94801	1.83878	0.142613
	127.595	0.12475	9142.47	1.3322	1.83224	0.12475
	127.7	0.123588	9151.62	1.29212	1.8895	0.123588
	127.805	0.129042	9160.77	1.48017	1.93412	0.129042
	127.91	0.132073	9169.92	1.58464	1.98595	0.132073
	128.015	0.139458	9179.08	1.83927	1.99364	0.139458
	128.12	0.132603	9188.24	1.60291	1.96034	0.132603
	128.225	0.151585	9196.64	2.25733	1.93692	0.151585
	128.33	0.134195	9202.85	1.65782	1.93814	0.134195
	128.435	0.152846	9209.81	2.3008	1.94059	0.152846
	128.54	0.1759	9216.76	3.09564	1.92319	0.1759
	128.645	0.128081	9223.71	1.44701	1.92328	0.128081
	128.75	0.181733	9230.66	3.29672	1.94633	0.181733
	128.855	0.154936	9237.6	2.37289	1.9653	0.154936
	128.96	0.177568	9244.54	3.15315	1.97748	0.177568
	129.065	0.161132	9251.47	2.58647	2.01239	0.161132
	129.17	0.161339	9258.4	2.59362	2.06939	0.161339
	129.275	0.147944	9265.32	2.13183	2.11387	0.147944
	129.38	0.128859	9272.24	1.47384	2.11593	0.128859
	129.485	0.143408	9279.16	1.97543	2.11505	0.143408
	129.59	0.130626	9286.07	1.53477	2.09984	0.130626
	129.695	0.119818	9292.98	1.16216	2.1408	0.119818
	129.8	0.116985	9299.88	1.06448	2.12699	0.116985
	129.905	0.126336	9306.77	1.38685	2.10571	0.126336
	130.01	0.146679	9313.67	2.08821	2.14449	0.146679
	130.115	0.156368	9320.55	2.42224	2.10219	0.156368
	130.22	0.133577	9327.44	1.63651	2.06688	0.133577
	130.325	0.148904	9334.32	2.16491	2.01495	0.148904
	130.43	0.170377	9341.19	2.90523	1.96879	0.170377
	130.535	0.164324	9348.06	2.69653	1.92369	0.164324
	130.64	0.140958	9354.93	1.89098	1.88166	0.140958
	130.745	0.131961	9361.79	1.58079	1.88443	0.131961
	130.85	0.140558	9368.64	1.87717	1.85455	0.140558
	130.955	0.163895	9375.49	2.68174	1.82985	0.163895
	131.06	0.142829	9382.34	1.95546	1.84778	0.142829
	131.165	0.160475	9389.18	2.56382	1.82695	0.160475
	131.27	0.156201	9396.02	2.4165	1.79641	0.156201
	131.375	0.151058	9402.86	2.23918	1.72752	0.151058
	131.48	0.129328	9409.68	1.49001	1.64263	0.129328
	131.585	0.139912	9416.51	1.85491	1.5893	0.139912
	131.69	0.127663	9423.33	1.4326	1.52595	0.127663
	131.795	0.128636	9430.14	1.46617	1.39265	0.128636
	131.9	0.117466	9436.96	1.08107	1.30088	0.117466
	132.005	0.130865	9443.76	1.543	1.24607	0.130865
	132.11	0.121741	9450.56	1.22843	1.17342	0.121741
	132.215	0.112715	9457.36	0.917262	1.08477	0.112715
	132.32	0.132819	9464.15	1.61036	0.998602	0.132819
	132.425	0.101884	9470.94	0.543862	0.963849	0.101884
	132.53	0.104188	9477.73	0.623272	0.864131	0.104188
	132.635	0.0967281	9484.51	0.366099	0.794387	0.0967281
	132.74	0.0948068	9491.28	0.299858	0.719559	0.0948068
	132.845	0.094909	9498.05	0.303383	0.640945	0.094909
	132.95	0.102961	9504.82	0.580982	0.562494	0.102961
	133.055	0.0737163	9511.58	-0.427257	0.50031	0.0737163
	133.16	0.0977798	9518.33	0.402355	0.441673	0.0977798
	133.265	0.101211	9525.09	0.520639	0.378675	0.101211
	133.39	0.0792825	9533.12	-0.235357	0.271436	0.0792825
	133.495	0.0762761	9539.86	-0.339006	0.210608	0.0762761
	133.6	0.101409	9546.6	0.527463	0.15246	0.101409
	133.705	0.117628	9553.33	1.08663	0.0976403	0.117628
	133.81	0.0881647	9560.06	0.070867	0.164976	0.0881647
	133.915	0.105627	9566.78	0.67289	0.231735	0.105627
	134.02	0.0967971	9573.5	0.368478	0.31736	0.0967971
	134.145	0.0723218	9581.5	-0.475332	0.414274	0.0723218
	134.25	0.0830241	9588.21	-0.106363	0.496619	0.0830241
	134.355	0.0825704	9594.91	-0.122004	0.554153	0.0825704
	134.46	0.0861162	9601.61	0.000242385	0.630934	0.0861162
	134.565	0.071784	9608.31	-0.493874	0.676588	0.071784
	134.67	0.0531012	9615	-1.13798	0.715742	0.0531012
	134.775	0.0776317	9621.69	-0.292268	0.781634	0.0776317
	134.88	0.0705497	9628.37	-0.53643	0.867113	0.0705497
	134.985	0.0930663	9635.05	0.239855	0.984301	0.0930663
	135.09	0.150712	9641.72	2.22725	1.06833	0.150712
	135.195	0.152598	9648.39	2.29226	1.16521	0.152598
	135.3	0.158818	9655.06	2.50672	1.20798	0.158818
	135.405	0.165083	9661.72	2.72271	1.2797	0.165083
	135.51	0.154621	9668.37	2.36201	1.38818	0.154621
	135.615	0.144681	9675.02	2.01932	1.4829	0.144681
	135.72	0.129394	9681.67	1.49228	1.5882	0.129394
	135.825	0.130885	9688.31	1.5437	1.71186	0.130885
	135.93	0.129603	9694.95	1.4995	1.84391	0.129603
	136.035	0.127063	9701.58	1.41194	2.01147	0.127063
	136.14	0.13826	9708.21	1.79796	2.1489	0.13826
	136.245	0.186387	9714.83	3.45717	2.28509	0.186387
	136.35	0.178559	9721.45	3.1873	2.40699	0.178559
	136.432	0.158416	9726.65	2.49284	2.43732	0.158416
	136.537	0.136641	9733.26	1.74215	2.44528	0.136641
	136.642	0.148808	9739.87	2.16161	2.4559	0.148808
	136.747	0.15098	9746.47	2.2365	2.43914	0.15098
	136.852	0.151715	9753.07	2.26183	2.45786	0.151715
	136.957	0.158926	9759.66	2.51042	2.50241	0.158926
	137.062	0.17579	9766.25	3.09183	2.57128	0.17579
	137.167	0.167539	9772.83	2.80738	2.62194	0.167539
	137.272	0.1746	9779.41	3.05081	2.70669	0.1746
	137.377	0.177294	9785.99	3.14369	2.76078	0.177294
	137.482	0.169302	9792.56	2.86815	2.79846	0.169302
	137.587	0.181467	9799.12	3.28754	2.76265	0.181467
	137.692	0.172704	9805.69	2.98544	2.76021	0.172704
	137.797	0.158366	9812.24	2.49112	2.76124	0.158366
	137.902	0.166524	9818.8	2.7724	2.80206	0.166524
	138.007	0.152926	9825.34	2.30357	2.84113	0.152926
	138.112	0.168197	9831.89	2.83007	2.84693	0.168197
	138.217	0.176987	9838.43	3.1331	2.85926	0.176987
	138.322	0.179334	9844.96	3.214	2.82509	0.179334
	138.427	0.167618	9851.49	2.81009	2.80011	0.167618
	138.532	0.191063	9858.01	3.6184	2.77442	0.191063
	138.637	0.166281	9864.54	2.76402	2.76471	0.166281
	138.742	0.165589	9871.05	2.74015	2.7392	0.165589
	138.847	0.16042	9877.56	2.56194	2.70977	0.16042
	138.952	0.176786	9884.07	3.12616	2.67003	0.176786
	139.057	0.159166	9890.57	2.51871	2.664	0.159166
	139.162	0.166236	9897.07	2.76246	2.69193	0.166236
	139.267	0.177141	9903.57	3.13841	2.66281	0.177141
	139.372	0.155191	9910.05	2.38167	2.70398	0.155191
	139.477	0.160651	9916.54	2.56989	2.68109	0.160651
	139.582	0.134152	9923.02	1.65631	2.62495	0.134152
	139.687	0.157671	9929.49	2.46715	2.57156	0.157671
	139.792	0.148914	9935.97	2.16524	2.48706	0.148914
	139.897	0.167556	9942.43	2.80796	2.40788	0.167556
	140.002	0.158802	9948.89	2.50615	2.35313	0.158802
	140.107	0.147958	9955.35	2.13231	2.29135	0.147958
	140.212	0.152647	9961.8	2.29396	2.27651	0.152647
	140.317	0.168334	9968.25	2.83479	2.21862	0.168334
	140.422	0.17862	9974.7	3.18939	2.16086	0.17862
	140.505	0.145405	9979.76	2.0443	2.11142	0.145405
	140.61	0.182783	9986.19	3.33293	2.03961	0.182783
	140.715	0.151597	9992.62	2.25775	2.0083	0.151597
	140.842	0.13628	10000.4	1.72969	2.03318	0.13628
	140.947	0.140619	10006.8	1.87927	2.03958	0.140619
	141.052	0.106338	10013.3	0.697393	2.00155	0.106338
	141.157	0.133647	10019.7	1.63891	2.00015	0.133647
	141.262	0.126579	10026.1	1.39523	1.96035	0.126579
	141.367	0.12079	10032.5	1.19566	1.93539	0.12079
	141.472	0.149659	10038.9	2.19094	1.95661	0.149659
	141.577	0.134809	10045.3	1.67898	1.94501	0.134809
	141.682	0.117283	10051.7	1.07475	1.94482	0.117283
	141.787	0.130382	10058.1	1.52634	1.92023	0.130382
	141.892	0.125068	10064.4	1.34316	1.90604	0.125068
	141.997	0.132492	10070.8	1.5991	1.85219	0.132492
	142.125	0.178692	10078.5	3.19188	1.83022	0.178692
	142.23	0.13879	10084.9	1.81622	1.82826	0.13879
	142.335	0.130095	10091.3	1.51646	1.81348	0.130095
	142.417	0.147895	10096.3	2.13014	1.86119	0.147895
	142.522	0.138698	10102.6	1.81305	1.85155	0.138698
	142.627	0.1407	10109	1.88207	1.90073	0.1407
	142.732	0.163345	10115.3	2.66277	1.89259	0.163345
	142.837	0.144235	10121.7	2.00394	1.83559	0.144235
	142.965	0.168197	10129.3	2.83006	1.83602	0.168197
	143.07	0.160794	10135.7	2.57485	1.85968	0.160794
	143.175	0.135113	10142	1.68944	1.87056	0.135113
	143.257	0.143736	10147	1.98675	1.87045	0.143736
	143.362	0.13566	10153.3	1.70832	1.9118	0.13566
	143.467	0.134865	10159.6	1.68092	1.87636	0.134865
	143.572	0.129897	10165.9	1.50962	1.87684	0.129897
	143.677	0.140933	10172.2	1.89011	1.88421	0.140933
	143.782	0.126659	10178.5	1.39798	1.8748	0.126659
	143.887	0.16224	10184.8	2.62468	1.87944	0.16224
	143.992	0.114889	10191.1	0.992199	1.87284	0.114889
	144.097	0.108324	10197.4	0.765879	1.85356	0.108324
	144.202	0.135126	10203.7	1.68989	1.83704	0.135126
	144.307	0.13444	10209.9	1.66626	1.82314	0.13444
	144.412	0.138266	10216.2	1.79816	1.80553	0.138266
	144.517	0.124994	10222.5	1.34061	1.83886	0.124994
	144.622	0.162472	10228.7	2.63269	1.82646	0.162472
	144.727	0.152994	10235	2.30593	1.86291	0.152994
	144.832	0.139141	10241.3	1.82831	1.86027	0.139141
	144.937	0.135437	10247.5	1.70064	1.86603	0.135437
	145.042	0.141074	10253.7	1.89497	1.85178	0.141074
	145.147	0.142057	10260	1.92885	1.88415	0.142057
	145.252	0.13592	10266.2	1.71726	1.84847	0.13592
	145.357	0.14936	10272.5	2.18063	1.86293	0.14936
	145.462	0.132259	10278.7	1.59107	1.873	0.132259
	145.567	0.158113	10284.9	2.4824	1.85881	0.158113
	145.672	0.148027	10291.1	2.1347	1.8232	0.148027
	145.777	0.15928	10297.3	2.52265	1.80525	0.15928
	145.882	0.134746	10303.5	1.6768	1.81485	0.134746
	145.987	0.162095	10309.8	2.61967	1.78825	0.162095
	146.092	0.132947	10315.9	1.61477	1.75837	0.132947
	146.197	0.134071	10322.1	1.65353	1.74655	0.134071
	146.302	0.1306	10328.3	1.53387	1.78059	0.1306
	146.407	0.150134	10334.5	2.20731	1.74643	0.150134
	146.512	0.136369	10340.7	1.73276	1.7563	0.136369
	146.617	0.125373	10346.9	1.35367	1.75383	0.125373
	146.722	0.115628	10353.1	1.01769	1.74661	0.115628
	146.827	0.124836	10359.2	1.33515	1.78134	0.124836
	146.932	0.108614	10365.4	0.775871	1.78511	0.108614
	147.037	0.125248	10371.5	1.34934	1.76294	0.125248
	147.142	0.131961	10377.7	1.58078	1.74917	0.131961
	147.247	0.143179	10383.8	1.96754	1.77696	0.143179
	147.352	0.131329	10390	1.55901	1.77268	0.131329
	147.435	0.130566	10394.8	1.53269	1.76007	0.130566
	147.54	0.160122	10401	2.55166	1.78056	0.160122
	147.645	0.116308	10407.1	1.04115	1.8128	0.116308
	147.75	0.149209	10413.2	2.17542	1.83633	0.149209
	147.855	0.134134	10419.3	1.6557	1.86593	0.134134
	147.96	0.144124	10425.5	2.00012	1.91708	0.144124
	148.065	0.157442	10431.6	2.45926	1.97316	0.157442
	148.17	0.160849	10437.7	2.57675	1.97266	0.160849
	148.275	0.131951	10443.8	1.58046	2.00087	0.131951
	148.38	0.149292	10449.9	2.17829	2.03564	0.149292
	148.485	0.154895	10456	2.37148	2.07099	0.154895
	148.59	0.158993	10462.1	2.51274	2.11263	0.158993
	148.695	0.123806	10468.2	1.29964	2.14544	0.123806
	148.8	0.148928	10474.3	2.16575	2.14561	0.148928
	148.905	0.153976	10480.3	2.33976	2.14573	0.153976
	149.01	0.167197	10486.4	2.79558	2.21312	0.167197
	149.137	0.157831	10493.8	2.47269	2.18645	0.157831
	149.242	0.162464	10499.8	2.63239	2.20554	0.162464
	149.347	0.156299	10505.9	2.41985	2.20106	0.156299
	149.452	0.124473	10512	1.32263	2.19118	0.124473
	149.557	0.129069	10518	1.48108	2.15986	0.129069
	149.64	0.150463	10522.8	2.21865	2.15189	0.150463
	149.745	0.157592	10528.8	2.46443	2.13487	0.157592
	149.85	0.173375	10534.8	3.00858	2.10244	0.173375
	149.955	0.155119	10540.9	2.37917	2.08495	0.155119
	150.06	0.130693	10546.9	1.53707	2.11679	0.130693
	150.165	0.160204	10552.9	2.5545	2.08351	0.160204
	150.27	0.165182	10558.9	2.72612	2.09564	0.165182
	150.375	0.129868	10565	1.50862	2.08563	0.129868
	150.48	0.147973	10571	2.13281	2.08854	0.147973
	150.585	0.140878	10577	1.88821	2.08506	0.140878
	150.69	0.150276	10583	2.21221	2.08617	0.150276
	150.795	0.13814	10589	1.7938	2.09247	0.13814
	150.9	0.126169	10595	1.38112	2.1043	0.126169
	151.005	0.136949	10600.9	1.75276	2.10244	0.136949
	151.11	0.131385	10606.9	1.56094	2.09271	0.131385
	151.215	0.14631	10612.9	2.07548	2.06318	0.14631
	151.32	0.14689	10618.9	2.09549	2.09664	0.14689
	151.425	0.1248	10624.9	1.3339	2.12221	0.1248
	151.53	0.162771	10630.8	2.64298	2.08329	0.162771
	151.635	0.159938	10636.8	2.54533	2.05541	0.159938
	151.74	0.159938	10642.7	2.54533	2.1198	0.159938
	151.845	0.159938	10648.7	2.54533	2.10387	0.159938
	151.95	0.157106	10654.6	2.44768	2.07982	0.157106
	152.055	0.12904	10660.6	1.48009	2.07431	0.12904
	152.16	0.13765	10666.5	1.77692	2.0865	0.13765
	152.265	0.149111	10672.5	2.17205	2.11857	0.149111
	152.37	0.150536	10678.4	2.22119	2.13599	0.150536
	152.475	0.151961	10684.3	2.27032	2.16474	0.151961
	152.58	0.179387	10690.2	3.21585	2.16944	0.179387
	152.685	0.149232	10696.1	2.17622	2.17355	0.149232
	152.79	0.131984	10702.1	1.58158	2.22294	0.131984
	152.895	0.144963	10708	2.02905	2.19668	0.144963
	153	0.176564	10713.9	3.1185	2.17344	0.176564
	153.105	0.136419	10719.8	1.73449	2.14688	0.136419
	153.21	0.12344	10725.7	1.28703	2.11623	0.12344
