# Supplementary material
Source: Research Square preprint supplement (doi:10.21203/rs.3.rs-9540103/v1)

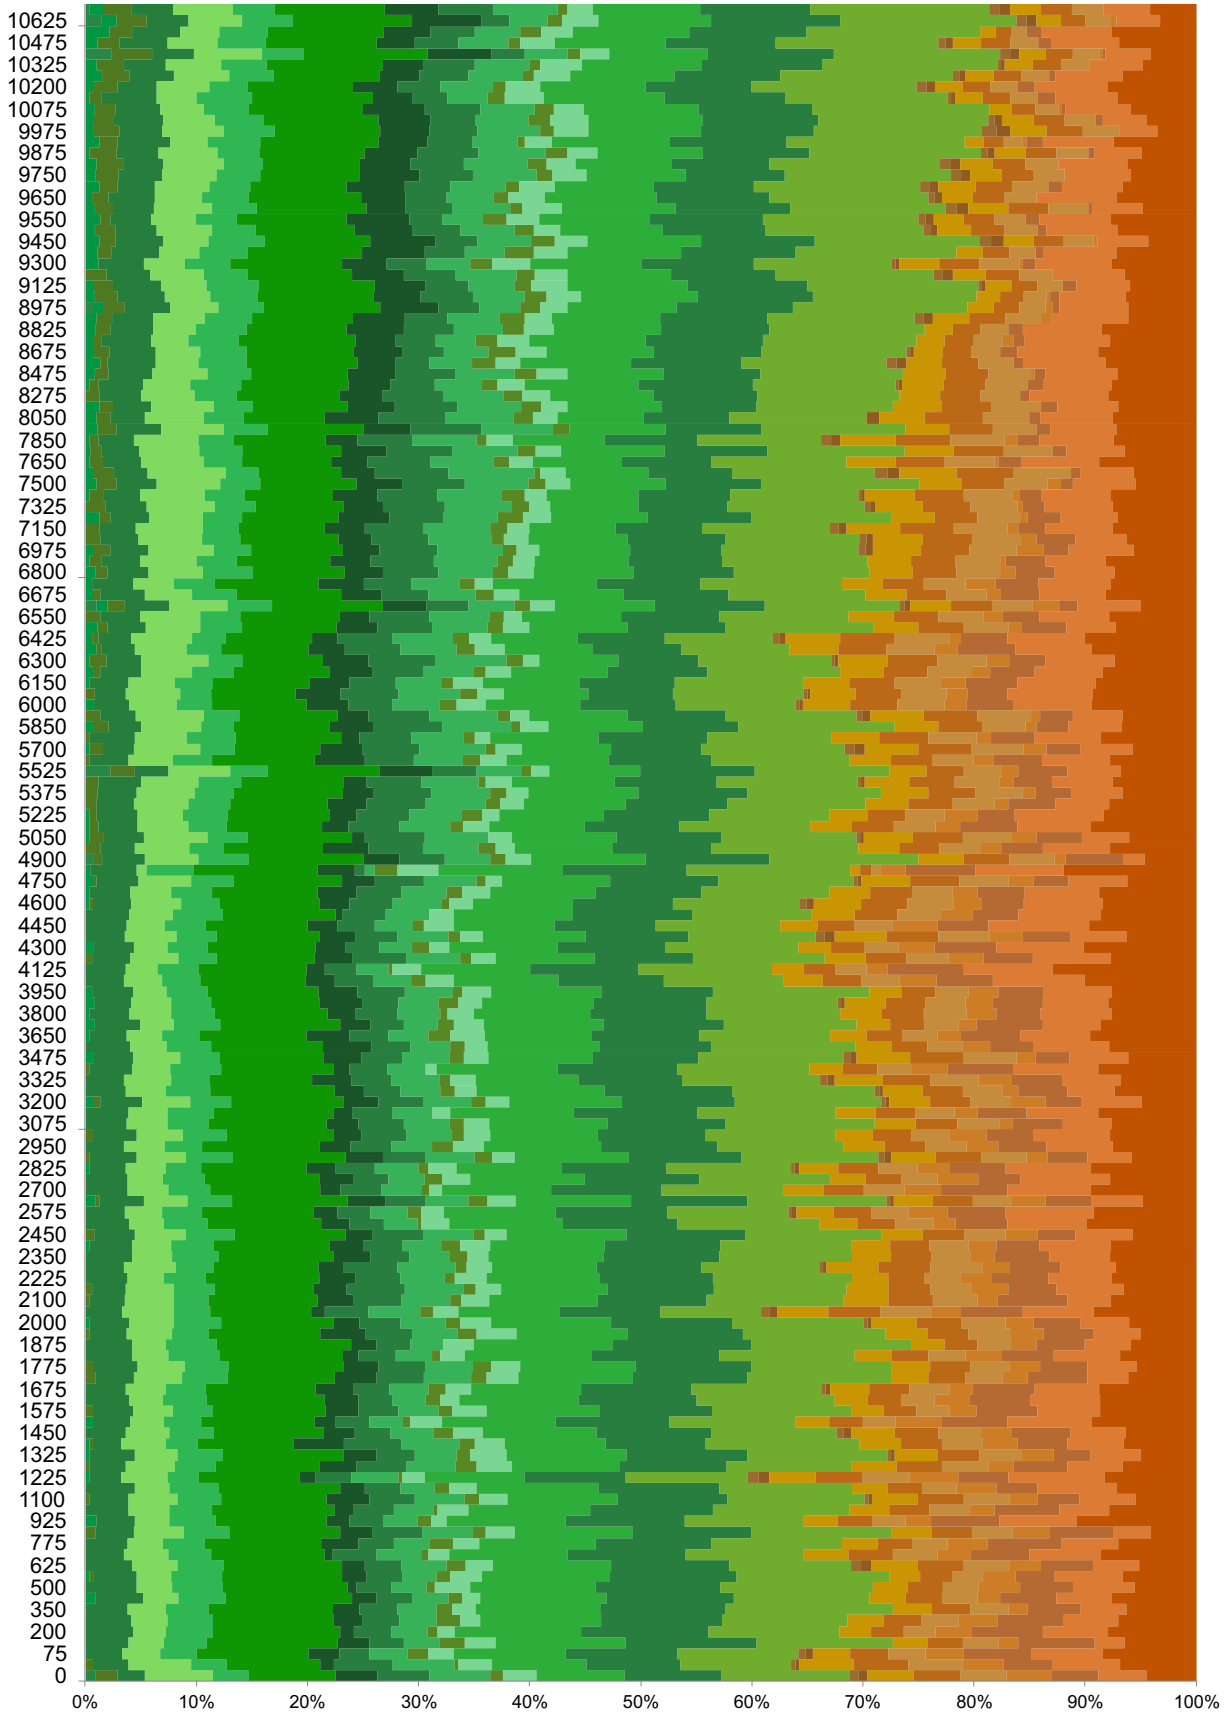

Supplement: Supplementary file 1 [file ad807d36c54b227507d98bab.pdf]

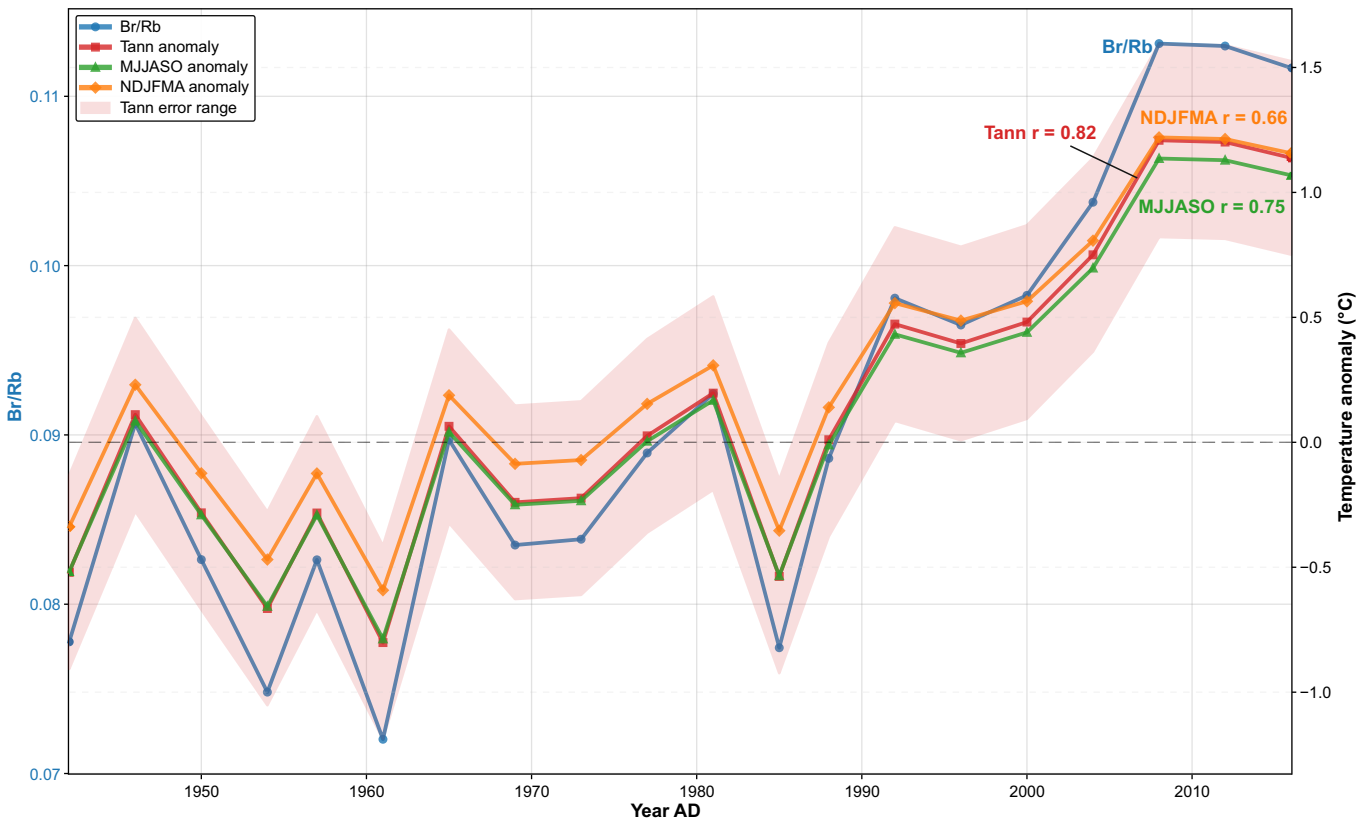

Supplement: Supplementary file 2 [file dcc442f935abb0498e550fc4.pdf]

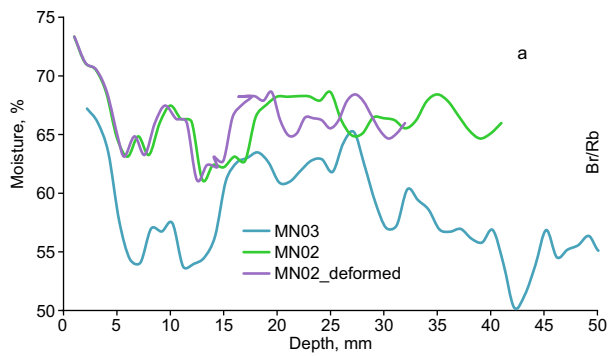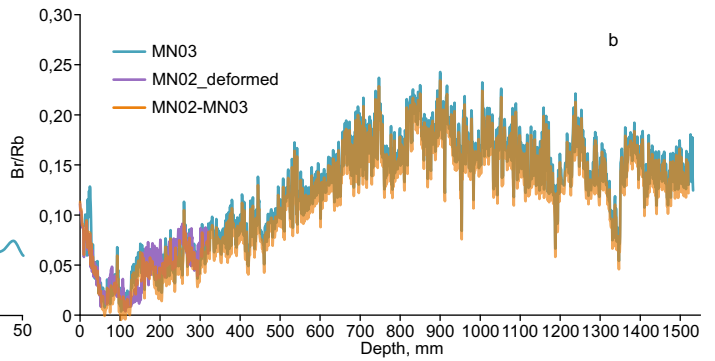

Supplement: Supplementary file 3 [file f526fbe1245e288ecce5cf1b.pdf]
